# Supplementary material for: S100A10 Is a Critical Mediator of GAS6/AXL–Induced Angiogenesis in Renal Cell Carcinoma
Source: Oxford University Press journal article supplement (doi:10.1158/0008-5472.can-19-1366), 2019-10-04
Supplement: 00085472can191366-sup-221540_3_supp_5788561_py3mc9.docx [file 00085472can191366-sup-221540_3_supp_5788561_py3mc9.docx]

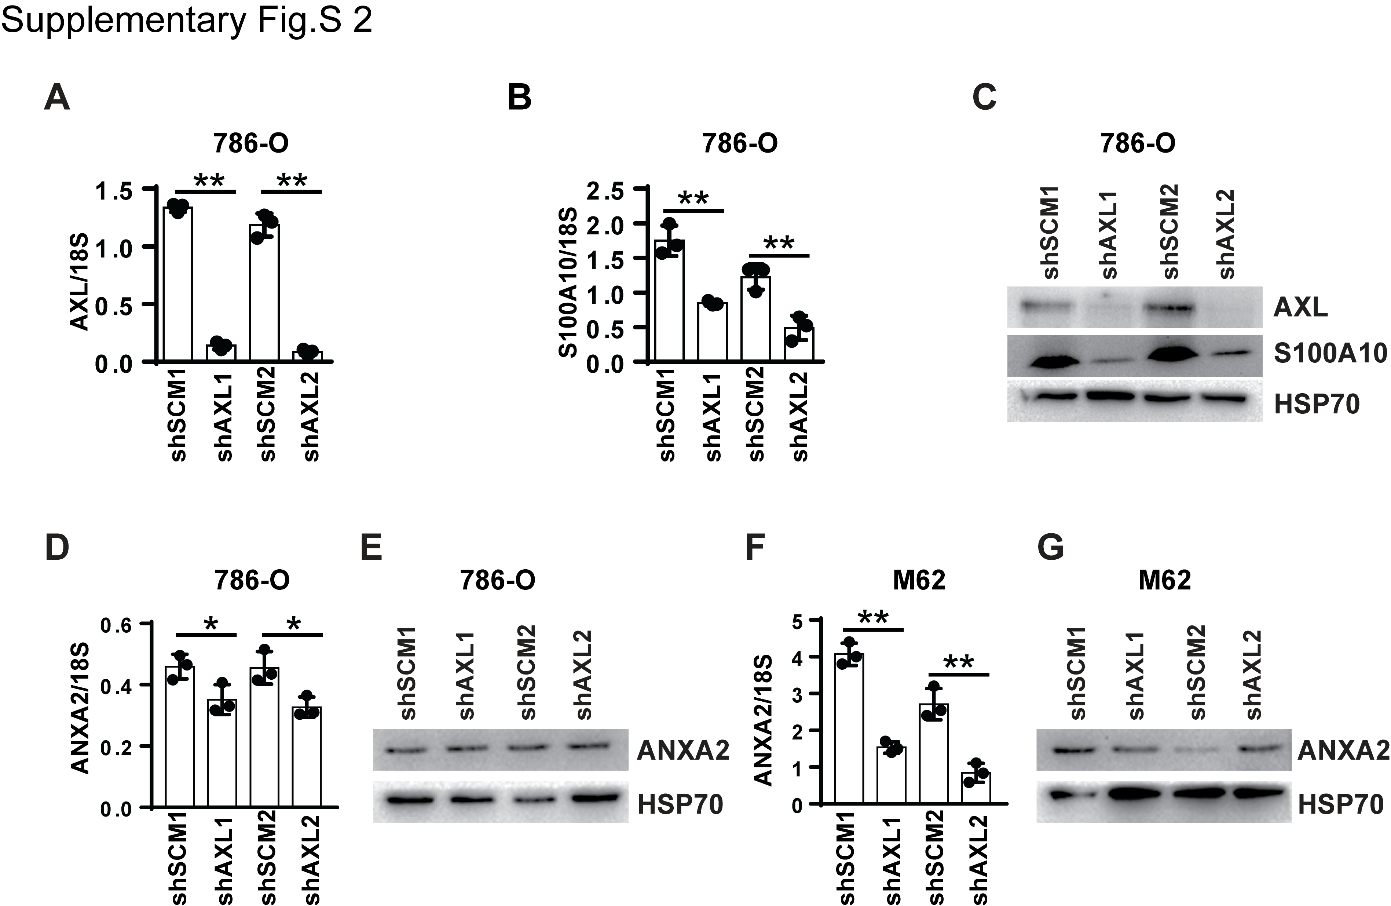


**Supplementary Fig.S2. S100A10 and ANXA2 expression in ccRCCs.** (A-B) Real-time PCR analysis of AXL (A) and ANXA2 (B) expression in the 786-O cells transfected with shSCM1, shAXL1, shSCM2 or shAXL2. (C) Western blot analysis of AXL and S100A10 expression in the 786-O cells transfected with shSCM1, shAXL1, shSCM2 or shAXL2. HSP70 was used as loading control. (D-G) Real-time PCR (A and F) and Western blot (E and G) analysis of ANXA2 expression in the 786-O (D and E) and M62 (F and G) cells transfected with shSCM1, shAXL1, shSCM2 or shAXL2. All experiments were independently repeated three times. Data represent the averages ± SD. *p < 0.05 and **p < 0.01.
