# Supplementary material for: S100A10 Is a Critical Mediator of GAS6/AXL–Induced Angiogenesis in Renal Cell Carcinoma
Source: Oxford University Press journal article supplement (doi:10.1158/0008-5472.can-19-1366), 2019-10-04
Supplement: 00085472can191366-sup-221540_3_supp_5788562_py3mc9.docx [file 00085472can191366-sup-221540_3_supp_5788562_py3mc9.docx]

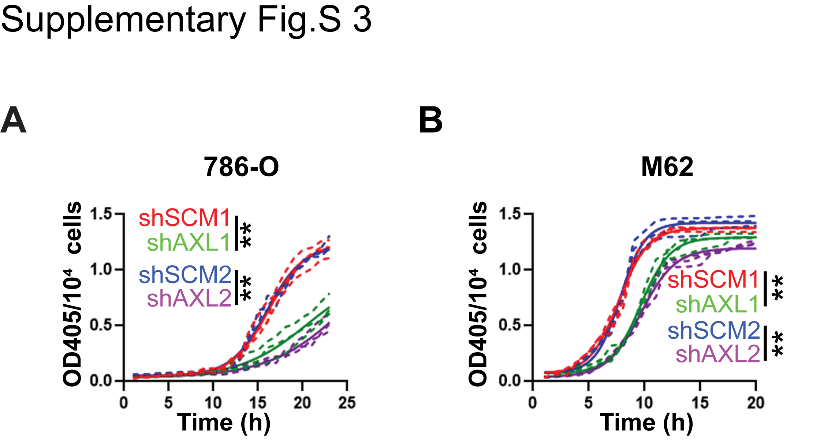


**Supplementary Fig.S3. Genetic knockdown of AXL in ccRCC cells reduces plasmin production in vitro.** The rate of plasmin generation in 786-O (A) or M62 (B) cells transfected with shSCM1, shAXL1, shSCM2 or shAXL2. Solid lines indicate the average and dashed lines indicate the variance.
