# Supplementary material for: S100A10 Is a Critical Mediator of GAS6/AXL–Induced Angiogenesis in Renal Cell Carcinoma
Source: Oxford University Press journal article supplement (doi:10.1158/0008-5472.can-19-1366), 2019-10-04
Supplement: 00085472can191366-sup-221540_3_supp_5788563_py3mc9.docx [file 00085472can191366-sup-221540_3_supp_5788563_py3mc9.docx]

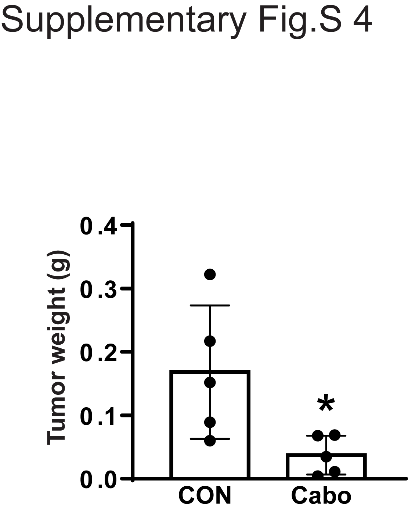


**Supplementary Fig.S4. Cabozantinib therapy inhibits ccRCC tumor growth.** Total weight of primary tumors taken from mice with orthotopic sub-renal capsule injection of parental M62 cells treated with vehicle (CON) and cabozantinib (Cabo,10 mg/kg) daily for 50 days starting 23 days flowing tumor injection (n=5). Data represent the averages ± SD. *p < 0.05.
