# Supplementary material for: S100A10 Is a Critical Mediator of GAS6/AXL–Induced Angiogenesis in Renal Cell Carcinoma
Source: Oxford University Press journal article supplement (doi:10.1158/0008-5472.can-19-1366), 2019-10-04
Supplement: 00085472can191366-sup-221540_3_supp_5788564_py3mc9.docx [file 00085472can191366-sup-221540_3_supp_5788564_py3mc9.docx]

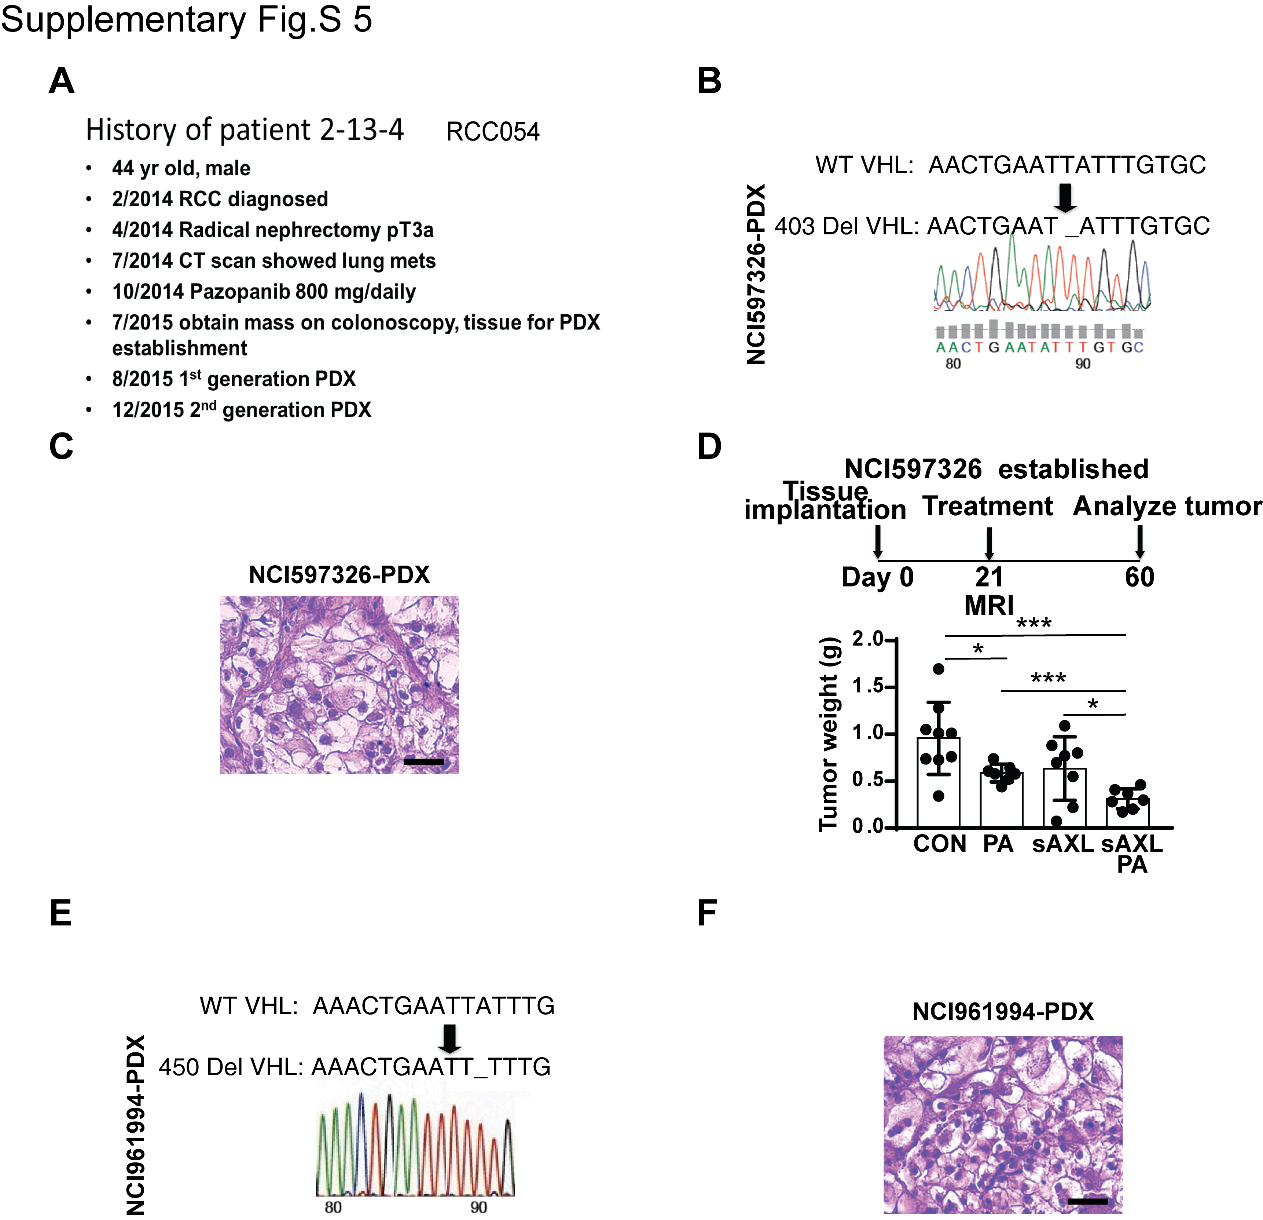


**Supplementary Fig.S5. Kidney cancer ccRCC patient information and sAXL in sensitizing PDX tumor to TKI therapy.** (A) Timeline diagnosis and therapy for patient RCC054. (B) Sequencing of VHL in NCI597326-PDX tumor showing a VHL deletion mutation at nucleotide 403. (C) H&E staining of NCI597326 tumor demonstrated that histological features of clear cell renal cell carcinoma. (D) Schematic description of sAXL and pazopanib (PA) for established NCI597326-PDX treatment scheduling (*upper*) and tumor weight (*lower*). Data represent the averages ± SD. *p < 0.05 and ***p < 0.001. (E) Sequencing of VHL in NCI961994-PDX tumor showing a VHL deletion mutation at nucleotide 403. (F) H&E staining of NCI961994 tumor demonstrated that histological features of clear cell renal cell carcinoma.
