# Supplementary material for: S100A10 Is a Critical Mediator of GAS6/AXL–Induced Angiogenesis in Renal Cell Carcinoma
Source: Oxford University Press journal article supplement (doi:10.1158/0008-5472.can-19-1366), 2019-10-04
Supplement: 00085472can191366-sup-221540_3_supp_5788565_py5l3y.xlsx [file 00085472can191366-sup-221540_3_supp_5788565_py5l3y.xlsx]

## Sheet: Sheet1
Supplementary Table 1. gene expression profile in 786-O cell transfected with shSCM1 and shAXL1
GeneName	GeneID	GeneType	h7860C	H7860K	Fold change
EXOG	ENSG00000157036.12	protein_coding	5.98	73.38	12.2709
BCAM	ENSG00000187244.10	protein_coding	8.47	76.91	9.08028
CFD	ENSG00000197766.7	protein_coding	5.56	27.34	4.91727
CDH16	ENSG00000166589.12	protein_coding	7.43	33.8	4.54913
CFB	ENSG00000243649.8	protein_coding	8.56	33.59	3.92407
NUPR1	ENSG00000176046.8	protein_coding	12.86	46.15	3.58865
HIST1H2BK	ENSG00000197903.7	protein_coding	9.1	31.8	3.49451
LAMA5	ENSG00000130702.14	protein_coding	12.68	44.21	3.48659
ASS1	ENSG00000130707.17	protein_coding	19.43	67.64	3.48121
TCN2	ENSG00000185339.8	protein_coding	14.86	51.56	3.46972
HIST1H1C	ENSG00000187837.3	protein_coding	9.02	29.43	3.26275
TMEM265	ENSG00000281991.1	protein_coding	6.34	19.73	3.11199
TMEM91	ENSG00000142046.14	protein_coding	11.51	35.76	3.10686
SEMA3B	ENSG00000012171.18	protein_coding	39.42	121.98	3.09437
TBC1D3	ENSG00000274611.3	protein_coding	5.37	16.55	3.08194
CPE	ENSG00000109472.13	protein_coding	20.18	62.1	3.0773
IFI44	ENSG00000137965.10	protein_coding	9.87	30.14	3.0537
ODF3B	ENSG00000177989.13	protein_coding	9.45	28.67	3.03386
ACSM3	ENSG00000005187.11	protein_coding	30.56	91.79	3.0036
CCDC183	ENSG00000213213.13	protein_coding	77.41	230.79	2.9814
PYROXD2	ENSG00000119943.11	protein_coding	6.25	18.26	2.9216
TXNIP	ENSG00000265972.5	protein_coding	200.72	585	2.91451
CD68	ENSG00000129226.13	protein_coding	71.26	204.94	2.87595
TIMD4	ENSG00000145850.8	protein_coding	5.92	16.82	2.84122
MST1	ENSG00000173531.15	protein_coding	7.87	22.22	2.82338
PTEN	ENSG00000171862.9	protein_coding	13.11	36.85	2.81083
BAG1	ENSG00000107262.17	protein_coding	13.81	38.4	2.78059
RASA4	ENSG00000105808.17	protein_coding	13.39	36.71	2.7416
EZH1	ENSG00000108799.12	protein_coding	10.06	27.08	2.69185
EIF2A	ENSG00000144895.11	protein_coding	49.19	132.24	2.68835
PRSS53	ENSG00000151006.7	protein_coding	6.53	17.32	2.65237
MYO15B	ENSG00000266714.6	protein_coding	5.16	13.62	2.63953
HIST1H2BD	ENSG00000158373.8	protein_coding	6.76	17.71	2.61982
TRAPPC2L	ENSG00000167515.10	protein_coding	24.15	62.96	2.60704
GSDMB	ENSG00000073605.18	protein_coding	15.16	39.38	2.59763
PPP1R3B	ENSG00000173281.4	protein_coding	17.25	44.06	2.5542
C5orf56	ENSG00000197536.10	protein_coding	5.31	13.56	2.55367
LPAR2	ENSG00000064547.13	protein_coding	5.89	14.97	2.5416
HSD3B7	ENSG00000099377.13	protein_coding	19.11	48.44	2.5348
TRIB1	ENSG00000173334.3	protein_coding	11.02	27.91	2.53267
TCEA3	ENSG00000204219.9	protein_coding	17.51	44.08	2.51742
MSR1	ENSG00000038945.14	protein_coding	6.37	15.88	2.49294
MTMR11	ENSG00000014914.19	protein_coding	16.85	41.74	2.47715
GAA	ENSG00000171298.12	protein_coding	28.14	69.64	2.47477
GHDC	ENSG00000167925.15	protein_coding	12.72	31.37	2.46619
ALS2CL	ENSG00000178038.16	protein_coding	11.8	28.65	2.42797
FBXO16	ENSG00000214050.7	protein_coding	5.01	12.16	2.42715
FAM13A	ENSG00000138640.14	protein_coding	18.03	43.49	2.41209
ITIH5	ENSG00000123243.14	protein_coding	46.55	111.85	2.40279
CLK1	ENSG00000013441.15	protein_coding	44.75	107.5	2.40223
LAMB2	ENSG00000172037.13	protein_coding	234.82	563.79	2.40095
LOX	ENSG00000113083.12	protein_coding	23.63	56.7	2.39949
CDK20	ENSG00000156345.17	protein_coding	9.7	23.25	2.39691
RASD2	ENSG00000100302.6	protein_coding	7.44	17.79	2.39113
IRF7	ENSG00000185507.19	protein_coding	5.3	12.67	2.39057
DBP	ENSG00000105516.10	protein_coding	7.12	17.02	2.39045
SP110	ENSG00000135899.16	protein_coding	9.6	22.92	2.3875
AVL9	ENSG00000105778.17	protein_coding	14.8	35.09	2.37095
CLEC2D	ENSG00000069493.14	protein_coding	5.2	12.32	2.36923
TFAP4	ENSG00000090447.11	protein_coding	7.58	17.9	2.36148
ZNF581	ENSG00000171425.9	protein_coding	20.86	49.13	2.35523
CH507-42P11.8	ENSG00000275993.2	protein_coding	28.36	66.77	2.35437
G0S2	ENSG00000123689.5	protein_coding	40.19	94.47	2.35058
DLG4	ENSG00000132535.18	protein_coding	8.78	20.63	2.34966
PARP6	ENSG00000137817.16	protein_coding	26.94	63.27	2.34855
GLIS2	ENSG00000126603.8	protein_coding	25.63	59.99	2.34062
TESMIN	ENSG00000132749.10	protein_coding	8.52	19.93	2.3392
AHNAK2	ENSG00000185567.6	protein_coding	21.72	50.76	2.33702
MT1X	ENSG00000187193.8	protein_coding	154.96	362.13	2.33693
TTC39A	ENSG00000085831.15	protein_coding	11.99	27.91	2.32777
FBXO44	ENSG00000132879.13	protein_coding	7.65	17.8	2.3268
CDON	ENSG00000064309.14	protein_coding	11.64	27.06	2.32474
CFI	ENSG00000205403.12	protein_coding	45.6	105.84	2.32105
MAPK8IP3	ENSG00000138834.12	protein_coding	52.9	122.34	2.31267
SLC2A3	ENSG00000059804.15	protein_coding	36.86	84.85	2.30195
TSC22D1	ENSG00000102804.14	protein_coding	34.19	78.36	2.2919
CP	ENSG00000047457.13	protein_coding	108.86	249.3	2.2901
RABGGTB	ENSG00000137955.15	protein_coding	72.83	166.61	2.28766
LRRC49	ENSG00000137821.11	protein_coding	5.83	13.33	2.28645
RIN1	ENSG00000174791.10	protein_coding	8.15	18.6	2.28221
LRRK2	ENSG00000188906.14	protein_coding	5.21	11.89	2.28215
PPP1R15A	ENSG00000087074.7	protein_coding	33.63	76.7	2.2807
PCOLCE	ENSG00000106333.12	protein_coding	23.69	53.8	2.271
ACKR3	ENSG00000144476.5	protein_coding	16.87	38.31	2.2709
STX1A	ENSG00000106089.11	protein_coding	10.54	23.77	2.25522
SLC7A7	ENSG00000155465.18	protein_coding	48.84	109.89	2.25
C1S	ENSG00000182326.14	protein_coding	5.51	12.38	2.24682
PPIL6	ENSG00000185250.15	protein_coding	5.43	12.12	2.23204
HLA-A	ENSG00000206503.11	protein_coding	1248.45	2781.56	2.22801
PARP10	ENSG00000178685.13	protein_coding	25.06	55.83	2.22785
TNS1	ENSG00000079308.16	protein_coding	16.03	35.52	2.21585
C19orf66	ENSG00000130813.17	protein_coding	9.95	22.02	2.21307
FAM229A	ENSG00000225828.1	protein_coding	24.39	53.8	2.20582
C5orf45	ENSG00000161010.14	protein_coding	14.87	32.73	2.20108
SAT2	ENSG00000141504.11	protein_coding	55.16	120.9	2.19181
CEACAM19	ENSG00000186567.12	protein_coding	6.42	14.07	2.19159
2018-09-05	ENSG00000184702.17	protein_coding	5.3	11.58	2.18491
CCDC174	ENSG00000154781.15	protein_coding	10.3	22.39	2.17379
DPH1	ENSG00000108963.17	protein_coding	18.15	39.26	2.16309
DDIT3	ENSG00000175197.11	protein_coding	80.3	173.49	2.16052
HLA-E	ENSG00000204592.8	protein_coding	134.95	291.04	2.15665
ARRDC4	ENSG00000140450.8	protein_coding	7.73	16.62	2.15006
FOLR1	ENSG00000110195.11	protein_coding	37.2	79.73	2.14328
HIST2H2AA3	ENSG00000203812.2	protein_coding	10.97	23.46	2.13856
STC1	ENSG00000159167.11	protein_coding	34.78	74.19	2.13312
HINT3	ENSG00000111911.6	protein_coding	14.83	31.63	2.13284
TMEM150A	ENSG00000168890.13	protein_coding	8.29	17.65	2.12907
HLA-B	ENSG00000234745.9	protein_coding	507.87	1076.32	2.11928
EXOSC5	ENSG00000077348.8	protein_coding	37.62	79.72	2.11909
IFIT2	ENSG00000119922.9	protein_coding	5.2	11	2.11538
IFITM3	ENSG00000142089.15	protein_coding	244.06	514.84	2.10948
MT-ND2	ENSG00000198763.3	protein_coding	3828.55	8070.84	2.10807
ICAM5	ENSG00000105376.4	protein_coding	6.92	14.58	2.10694
CRABP2	ENSG00000143320.8	protein_coding	12.38	26.08	2.10662
HSBP1L1	ENSG00000226742.3	protein_coding	19.41	40.87	2.10562
PPFIA3	ENSG00000177380.13	protein_coding	8.28	17.42	2.10386
RNF187	ENSG00000168159.10	protein_coding	72.83	152.66	2.09611
MDK	ENSG00000110492.15	protein_coding	14.45	30.13	2.08512
PPP1R3C	ENSG00000119938.8	protein_coding	8.25	17.13	2.07636
ALPK3	ENSG00000136383.6	protein_coding	6.07	12.6	2.07578
PDP2	ENSG00000172840.6	protein_coding	7.81	16.21	2.07554
USP36	ENSG00000055483.19	protein_coding	30.26	62.77	2.07436
LETMD1	ENSG00000050426.15	protein_coding	63.73	131.97	2.07077
SERPINA1	ENSG00000197249.13	protein_coding	104.8	216.25	2.06345
TRIM13	ENSG00000204977.9	protein_coding	7.33	15.12	2.06276
CKB	ENSG00000166165.12	protein_coding	7.8	16.08	2.06154
RARRES3	ENSG00000133321.10	protein_coding	17.85	36.66	2.05378
CRACR2B	ENSG00000177685.16	protein_coding	12.54	25.73	2.05183
PTGES	ENSG00000148344.10	protein_coding	31.93	65.21	2.04228
SPATA2L	ENSG00000158792.15	protein_coding	6.32	12.9	2.04114
CTSH	ENSG00000103811.15	protein_coding	31.27	63.74	2.03838
MYEOV	ENSG00000172927.7	protein_coding	161.76	328.85	2.03295
WARS2	ENSG00000116874.11	protein_coding	11.39	23.14	2.03161
RGPD5	ENSG00000015568.12	protein_coding	8.55	17.34	2.02807
SLC7A2	ENSG00000003989.16	protein_coding	44.34	89.72	2.02346
BTG1	ENSG00000133639.4	protein_coding	51.61	104.39	2.02267
RPL22L1	ENSG00000163584.17	protein_coding	60.08	121.31	2.01914
CRY2	ENSG00000121671.11	protein_coding	7.43	15	2.01884
TMEM182	ENSG00000170417.14	protein_coding	8.05	16.22	2.01491
CTIF	ENSG00000134030.13	protein_coding	6.73	13.53	2.0104
FLCN	ENSG00000154803.12	protein_coding	15.52	31.15	2.00709
RARRES1	ENSG00000118849.9	protein_coding	5.65	11.3	2
PHKA2	ENSG00000044446.11	protein_coding	43.55	87.07	1.99931
ZC3H8	ENSG00000144161.12	protein_coding	7.31	14.59	1.9959
FNBP1L	ENSG00000137942.16	protein_coding	20.22	40.28	1.99209
CDK18	ENSG00000117266.15	protein_coding	86.72	172.02	1.98363
IFI6	ENSG00000126709.14	protein_coding	42.65	84.48	1.98077
KAT2A	ENSG00000108773.10	protein_coding	17.82	35.27	1.97924
NFRKB	ENSG00000170322.14	protein_coding	9.12	18.04	1.97807
PPP1R37	ENSG00000104866.10	protein_coding	18.81	37.01	1.96757
CCNB1IP1	ENSG00000100814.17	protein_coding	43.66	85.64	1.96152
DERL3	ENSG00000099958.14	protein_coding	6.79	13.3	1.95876
FNIP2	ENSG00000052795.12	protein_coding	8.73	17.09	1.95762
PARD6B	ENSG00000124171.8	protein_coding	8.54	16.71	1.95667
ZNF579	ENSG00000218891.4	protein_coding	6.23	12.19	1.95666
NOB1	ENSG00000141101.12	protein_coding	46.64	91.03	1.95176
TPM2	ENSG00000198467.13	protein_coding	11.95	23.32	1.95146
FAM98C	ENSG00000130244.12	protein_coding	16.16	31.46	1.94678
HSF4	ENSG00000102878.16	protein_coding	37.32	72.65	1.94668
VPS13D	ENSG00000048707.13	protein_coding	11.63	22.62	1.94497
EIF4A2	ENSG00000156976.15	protein_coding	373.65	725.63	1.942
SH3BP2	ENSG00000087266.15	protein_coding	75.21	145.82	1.93884
ISYNA1	ENSG00000105655.18	protein_coding	6.42	12.44	1.93769
THBS3	ENSG00000169231.13	protein_coding	11.08	21.45	1.93592
ETNK1	ENSG00000139163.15	protein_coding	15.28	29.49	1.92997
PBX4	ENSG00000105717.13	protein_coding	7.38	14.24	1.92954
UAP1L1	ENSG00000197355.10	protein_coding	8.72	16.8	1.92661
GAD1	ENSG00000128683.13	protein_coding	9.78	18.8	1.92229
IGFBP4	ENSG00000141753.6	protein_coding	8.45	16.21	1.91834
BCL6	ENSG00000113916.17	protein_coding	8.27	15.82	1.91294
TNNT1	ENSG00000105048.16	protein_coding	46.79	89.5	1.9128
NPIPA1	ENSG00000183426.16	protein_coding	39.95	76.41	1.91264
NDRG1	ENSG00000104419.14	protein_coding	1670.08	3192.02	1.9113
DENND1C	ENSG00000205744.9	protein_coding	6.75	12.9	1.91111
P2RX4	ENSG00000135124.14	protein_coding	48.14	91.83	1.90756
ARSE	ENSG00000157399.14	protein_coding	23.67	45.03	1.90241
VEGFB	ENSG00000173511.9	protein_coding	64.16	121.86	1.89931
NPIPA5	ENSG00000183793.13	protein_coding	5.86	11.12	1.89761
POLR2I	ENSG00000105258.8	protein_coding	21.8	41.36	1.89725
CRELD1	ENSG00000163703.17	protein_coding	35.3	66.97	1.89717
TLE3	ENSG00000140332.15	protein_coding	12.83	24.33	1.89634
ACAP1	ENSG00000072818.11	protein_coding	14.36	27.13	1.88928
DPY19L2	ENSG00000177990.11	protein_coding	5.81	10.97	1.88812
HCFC1R1	ENSG00000103145.10	protein_coding	307.47	580.33	1.88744
METTL21B	ENSG00000123427.16	protein_coding	12.88	24.31	1.88742
SIAE	ENSG00000110013.12	protein_coding	25.97	49.01	1.88718
SEZ6L2	ENSG00000174938.14	protein_coding	62.49	117.88	1.88638
TIMM9	ENSG00000100575.13	protein_coding	34.95	65.83	1.88355
RAVER2	ENSG00000162437.14	protein_coding	10.12	19.06	1.8834
SERPINB1	ENSG00000021355.12	protein_coding	109.55	206.19	1.88215
RP11-577H5.5	ENSG00000267645.5	protein_coding	9.36	17.59	1.87927
RCOR3	ENSG00000117625.13	protein_coding	19.86	37.29	1.87764
SLC25A26	ENSG00000144741.17	protein_coding	26.1	48.96	1.87586
FCHSD1	ENSG00000197948.10	protein_coding	13.71	25.71	1.87527
VEGFA	ENSG00000112715.20	protein_coding	426.24	798.9	1.8743
MKNK2	ENSG00000099875.14	protein_coding	83.2	155.91	1.87392
NPIPB5	ENSG00000243716.10	protein_coding	27.31	50.99	1.86708
ZBTB25	ENSG00000089775.11	protein_coding	5.73	10.69	1.86562
EGFL7	ENSG00000172889.15	protein_coding	24.37	45.43	1.86418
UBE2L6	ENSG00000156587.15	protein_coding	37.54	69.84	1.86042
ADPRM	ENSG00000170222.11	protein_coding	8.58	15.95	1.85897
CRMP1	ENSG00000072832.14	protein_coding	9.04	16.79	1.8573
ZNF836	ENSG00000196267.12	protein_coding	12.26	22.77	1.85726
EIF1	ENSG00000173812.10	protein_coding	1013.61	1881.24	1.85598
PPP1R13L	ENSG00000104881.15	protein_coding	76.27	141.46	1.85473
FAM156A	ENSG00000268350.7	protein_coding	11.33	21.01	1.85437
TOM1	ENSG00000100284.20	protein_coding	25.17	46.59	1.85101
GOLPH3L	ENSG00000143457.10	protein_coding	24.58	45.49	1.85069
FHL3	ENSG00000183386.9	protein_coding	20.95	38.73	1.84869
PLIN2	ENSG00000147872.9	protein_coding	277.01	510.25	1.84199
PAG1	ENSG00000076641.4	protein_coding	7.76	14.29	1.84149
COL6A1	ENSG00000142156.14	protein_coding	19.63	36.13	1.84055
HDAC4	ENSG00000068024.16	protein_coding	6.51	11.98	1.84025
EXD3	ENSG00000187609.15	protein_coding	22.97	42.24	1.83892
ENO2	ENSG00000111674.8	protein_coding	82.44	151.59	1.83879
RSL1D1	ENSG00000171490.12	protein_coding	144.36	265.14	1.83666
ING5	ENSG00000168395.15	protein_coding	28.2	51.75	1.83511
LRRC37B	ENSG00000185158.12	protein_coding	7.53	13.81	1.834
MSH5	ENSG00000204410.14	protein_coding	22.05	40.43	1.83356
SDCCAG8	ENSG00000054282.15	protein_coding	13.83	25.32	1.8308
PLEKHA6	ENSG00000143850.13	protein_coding	16.45	30.11	1.8304
MT1F	ENSG00000198417.6	protein_coding	14.49	26.46	1.82609
KIAA0408	ENSG00000189367.14	protein_coding	6.2	11.32	1.82581
MXI1	ENSG00000119950.20	protein_coding	36.15	65.95	1.82434
NBPF10	ENSG00000271425.6	protein_coding	9.73	17.74	1.82323
INTS3	ENSG00000143624.13	protein_coding	26.12	47.58	1.82159
NFKBIL1	ENSG00000204498.10	protein_coding	23.78	43.31	1.82128
CERS2	ENSG00000143418.19	protein_coding	253.4	461.15	1.81985
SLC6A8	ENSG00000130821.15	protein_coding	78.04	141.8	1.81702
AKAP17A	ENSG00000197976.11_PAR_Y	protein_coding	20.6	37.39	1.81505
CSAD	ENSG00000139631.18	protein_coding	9.54	17.29	1.81237
SH3BP5	ENSG00000131370.15	protein_coding	6.86	12.43	1.81195
RP11-872D17.8	ENSG00000254979.5	protein_coding	8.41	15.23	1.81094
POLR1E	ENSG00000137054.15	protein_coding	13.45	24.35	1.81041
TPP1	ENSG00000166340.15	protein_coding	49.7	89.89	1.80865
SAP30L	ENSG00000164576.11	protein_coding	8.42	15.22	1.8076
RSAD1	ENSG00000136444.9	protein_coding	14.88	26.89	1.80712
INO80B	ENSG00000115274.14	protein_coding	20.24	36.56	1.80632
IFITM2	ENSG00000185201.16	protein_coding	70.97	127.91	1.80231
FBLN7	ENSG00000144152.12	protein_coding	23.54	42.36	1.79949
ADM	ENSG00000148926.9	protein_coding	177	318.15	1.79746
MMAA	ENSG00000151611.13	protein_coding	6.8	12.22	1.79706
ZNF561	ENSG00000171469.10	protein_coding	11.6	20.82	1.79483
OAF	ENSG00000184232.8	protein_coding	22.7	40.56	1.78678
DPP7	ENSG00000176978.13	protein_coding	160.71	287	1.78583
CFH	ENSG00000000971.15	protein_coding	78.38	139.95	1.78553
SUSD4	ENSG00000143502.14	protein_coding	5.53	9.87	1.78481
LGALS3	ENSG00000131981.15	protein_coding	67.93	121.22	1.78448
PSTPIP2	ENSG00000152229.18	protein_coding	6.52	11.62	1.78221
ZNF524	ENSG00000171443.6	protein_coding	13.2	23.52	1.78182
CXorf57	ENSG00000147231.13	protein_coding	5.07	9.01	1.77712
SOD3	ENSG00000109610.5	protein_coding	18.38	32.66	1.77693
IFIT1	ENSG00000185745.9	protein_coding	12.47	22.15	1.77626
FKBP10	ENSG00000141756.18	protein_coding	410.33	728.79	1.77611
ADCK3	ENSG00000163050.16	protein_coding	10.28	18.25	1.77529
APOL2	ENSG00000128335.13	protein_coding	170.58	302.39	1.77272
MT-CO3	ENSG00000198938.2	protein_coding	5533.59	9789.33	1.76907
TCTN1	ENSG00000204852.15	protein_coding	25.88	45.75	1.76777
FNBP4	ENSG00000109920.12	protein_coding	36.41	64.36	1.76765
PARP14	ENSG00000173193.13	protein_coding	24.34	42.96	1.765
NOL3	ENSG00000140939.14	protein_coding	53.48	94.34	1.76402
SPIRE1	ENSG00000134278.15	protein_coding	16.57	29.19	1.76162
DNHD1	ENSG00000179532.12	protein_coding	6.28	11.04	1.75796
HLA-F	ENSG00000204642.13	protein_coding	30.84	54.21	1.75778
EVC	ENSG00000072840.12	protein_coding	29.04	51.02	1.75689
CAMLG	ENSG00000164615.4	protein_coding	37.49	65.86	1.75674
SLC5A3	ENSG00000198743.6	protein_coding	8.2	14.4	1.7561
MTSS1L	ENSG00000132613.14	protein_coding	103.37	181.5	1.75583
MMP7	ENSG00000137673.8	protein_coding	30.06	52.77	1.75549
AHDC1	ENSG00000126705.13	protein_coding	19.62	34.44	1.75535
RP11-295K3.1	ENSG00000250644.3	protein_coding	20.25	35.54	1.75506
TOMM7	ENSG00000196683.10	protein_coding	622.1	1090.33	1.75266
HDAC10	ENSG00000100429.17	protein_coding	20.24	35.41	1.74951
PSAP	ENSG00000197746.13	protein_coding	1970.68	3446.88	1.74908
GDF15	ENSG00000130513.6	protein_coding	154.52	270.2	1.74864
EPB41	ENSG00000159023.19	protein_coding	48.85	85.42	1.74862
ZFYVE19	ENSG00000166140.17	protein_coding	22.01	38.47	1.74784
PRKAR1B	ENSG00000188191.14	protein_coding	7.32	12.79	1.74727
LTBP4	ENSG00000090006.17	protein_coding	79.51	138.62	1.74343
D2HGDH	ENSG00000180902.17	protein_coding	11.13	19.4	1.74304
STOM	ENSG00000148175.12	protein_coding	157.72	274.83	1.74252
ZNF558	ENSG00000167785.8	protein_coding	15.07	26.25	1.74187
BRPF3	ENSG00000096070.19	protein_coding	8.86	15.41	1.73928
ATAT1	ENSG00000137343.17	protein_coding	5.81	10.09	1.73666
SLC25A37	ENSG00000147454.13	protein_coding	36.6	63.53	1.73579
DDRGK1	ENSG00000198171.12	protein_coding	26.42	45.82	1.73429
NAPB	ENSG00000125814.17	protein_coding	5.43	9.41	1.73297
EFNA1	ENSG00000169242.11	protein_coding	24.51	42.44	1.73154
ACAD11	ENSG00000240303.7	protein_coding	18.53	32.08	1.73125
ZNF707	ENSG00000181135.15	protein_coding	7.14	12.36	1.73109
C3	ENSG00000125730.16	protein_coding	43.32	74.95	1.73015
REXO1	ENSG00000079313.12	protein_coding	13.15	22.75	1.73004
C9orf85	ENSG00000155621.14	protein_coding	21.76	37.54	1.72518
SS18L1	ENSG00000184402.14	protein_coding	6.57	11.33	1.72451
ABCC3	ENSG00000108846.15	protein_coding	30.19	52.03	1.72342
AFMID	ENSG00000183077.15	protein_coding	23.38	40.29	1.72327
JUN	ENSG00000177606.6	protein_coding	71.08	122.43	1.72243
RMND1	ENSG00000155906.16	protein_coding	19.48	33.54	1.72177
SNX15	ENSG00000110025.12	protein_coding	8.84	15.22	1.72172
C7orf55-LUC7L2	ENSG00000269955.2	protein_coding	5.08	8.74	1.72047
NME3	ENSG00000103024.7	protein_coding	37.39	64.3	1.71971
FHL1	ENSG00000022267.16	protein_coding	66.86	114.97	1.71956
ZNF783	ENSG00000204946.9	protein_coding	7.75	13.32	1.71871
RBM43	ENSG00000184898.6	protein_coding	9.8	16.84	1.71837
HPS4	ENSG00000100099.20	protein_coding	32.35	55.56	1.71747
MZF1	ENSG00000099326.8	protein_coding	6.54	11.23	1.71713
KIAA1958	ENSG00000165185.14	protein_coding	6.32	10.84	1.71519
PTPDC1	ENSG00000158079.14	protein_coding	8.56	14.67	1.71379
GLTSCR2	ENSG00000105373.18	protein_coding	258.58	442.86	1.71266
HOOK2	ENSG00000095066.11	protein_coding	34.42	58.93	1.71209
PHYKPL	ENSG00000175309.14	protein_coding	27.33	46.79	1.71204
ARHGEF16	ENSG00000130762.14	protein_coding	19.42	33.23	1.71112
SLC27A1	ENSG00000130304.16	protein_coding	15.35	26.23	1.70879
C19orf33	ENSG00000167644.11	protein_coding	70.44	120.28	1.70755
IGBP1	ENSG00000089289.15	protein_coding	55.73	95.09	1.70626
MPDZ	ENSG00000107186.16	protein_coding	5.07	8.65	1.70611
SAT1	ENSG00000130066.16	protein_coding	152.3	259.8	1.70584
ANKHD1-EIF4EBP3	ENSG00000254996.5	protein_coding	6.45	11	1.70543
FAM21C	ENSG00000172661.17	protein_coding	13	22.17	1.70538
R3HDM2	ENSG00000179912.20	protein_coding	30.09	51.26	1.70356
MFNG	ENSG00000100060.17	protein_coding	31.59	53.8	1.70307
ITPR1	ENSG00000150995.18	protein_coding	25.3	43.06	1.70198
AC007192.4	ENSG00000268173.2	protein_coding	5.51	9.37	1.70054
CCL28	ENSG00000151882.11	protein_coding	11.64	19.79	1.70017
GAS8	ENSG00000283182.1	protein_coding	5.93	10.08	1.69983
CARF	ENSG00000138380.17	protein_coding	5.73	9.74	1.69983
RBFOX3	ENSG00000167281.18	protein_coding	7.06	12	1.69972
SLC12A7	ENSG00000113504.20	protein_coding	14.89	25.29	1.69846
LRP1	ENSG00000123384.13	protein_coding	44.74	75.92	1.69692
IRF2BP2	ENSG00000168264.10	protein_coding	76	128.85	1.69539
CDAN1	ENSG00000140326.12	protein_coding	7.09	12.02	1.69535
ZNF528	ENSG00000167555.13	protein_coding	6.5	11.01	1.69385
EEF2K	ENSG00000103319.11	protein_coding	9.39	15.89	1.69223
BTN3A1	ENSG00000026950.16	protein_coding	25.25	42.68	1.6903
NINL	ENSG00000101004.14	protein_coding	5.58	9.43	1.68996
TIMP1	ENSG00000102265.11	protein_coding	189.48	319.86	1.68809
WDSUB1	ENSG00000196151.10	protein_coding	16.15	27.26	1.68793
RPL36	ENSG00000130255.12	protein_coding	866.26	1461.64	1.6873
SPATA20	ENSG00000006282.20	protein_coding	35.11	59.2	1.68613
MED9	ENSG00000141026.5	protein_coding	10.92	18.41	1.6859
LEMD1	ENSG00000186007.9	protein_coding	6.78	11.43	1.68584
CCNL1	ENSG00000163660.11	protein_coding	42.27	71.19	1.68417
KLHL24	ENSG00000114796.15	protein_coding	11.7	19.69	1.68291
KIF12	ENSG00000136883.12	protein_coding	35.91	60.38	1.68143
ZNF254	ENSG00000213096.10	protein_coding	5.26	8.84	1.68061
MT-CYB	ENSG00000198727.2	protein_coding	1587.2	2666.22	1.67983
UPP1	ENSG00000183696.13	protein_coding	27.84	46.73	1.67852
USP30	ENSG00000135093.12	protein_coding	7.49	12.57	1.67824
HSD11B1L	ENSG00000167733.13	protein_coding	6.88	11.54	1.67733
SKIL	ENSG00000136603.13	protein_coding	17.99	30.14	1.67538
TYMP	ENSG00000025708.13	protein_coding	31.9	53.41	1.67429
TOP1MT	ENSG00000184428.12	protein_coding	32.17	53.83	1.6733
ABCD4	ENSG00000119688.20	protein_coding	17.17	28.73	1.67327
KIZ	ENSG00000088970.15	protein_coding	14.52	24.28	1.67218
GAS8	ENSG00000141013.15	protein_coding	10.45	17.47	1.67177
UBR4	ENSG00000127481.14	protein_coding	274.57	458.98	1.67163
RASSF1	ENSG00000068028.17	protein_coding	29.01	48.46	1.67046
LLGL2	ENSG00000073350.13	protein_coding	10.14	16.92	1.66864
DIRAS2	ENSG00000165023.6	protein_coding	12.06	20.11	1.6675
RPP21	ENSG00000241370.5	protein_coding	24.77	41.3	1.66734
NSUN6	ENSG00000241058.3	protein_coding	6.23	10.38	1.66613
MRI1	ENSG00000037757.13	protein_coding	21.49	35.8	1.66589
NFX1	ENSG00000086102.18	protein_coding	16.63	27.7	1.66566
RBCK1	ENSG00000125826.19	protein_coding	421.78	701.87	1.66407
RXRB	ENSG00000204231.10	protein_coding	24.17	40.19	1.66281
ZNF721	ENSG00000182903.15	protein_coding	20.45	33.98	1.66161
NEK6	ENSG00000119408.16	protein_coding	256.23	425.7	1.6614
HK2	ENSG00000159399.9	protein_coding	27.55	45.74	1.66025
POLL	ENSG00000166169.16	protein_coding	21.39	35.5	1.65965
CHMP4C	ENSG00000164695.4	protein_coding	22.06	36.6	1.65911
SYNRG	ENSG00000275066.4	protein_coding	8.08	13.4	1.65842
OGFR	ENSG00000060491.16	protein_coding	46.28	76.7	1.6573
RPL17	ENSG00000265681.7	protein_coding	1883.93	3120.94	1.65661
TOMM20	ENSG00000173726.10	protein_coding	125.94	208.4	1.65476
DHRS3	ENSG00000162496.8	protein_coding	107.03	177.09	1.65458
ZNF83	ENSG00000167766.18	protein_coding	78.96	130.48	1.65248
ZHX2	ENSG00000178764.7	protein_coding	47.76	78.88	1.65159
ARG2	ENSG00000081181.7	protein_coding	13.29	21.93	1.65011
SGK2	ENSG00000101049.14	protein_coding	23.94	39.5	1.64996
MTX3	ENSG00000177034.14	protein_coding	8.42	13.87	1.64727
P4HA1	ENSG00000122884.12	protein_coding	151.1	248.67	1.64573
PERP	ENSG00000112378.11	protein_coding	37.05	60.93	1.64453
TRAPPC6A	ENSG00000007255.10	protein_coding	49.27	80.99	1.6438
CALCOCO1	ENSG00000012822.15	protein_coding	41.49	68.16	1.64281
ATP6V0A1	ENSG00000033627.15	protein_coding	8.76	14.39	1.64269
ABCA2	ENSG00000107331.16	protein_coding	158.59	260.4	1.64197
CMBL	ENSG00000164237.8	protein_coding	88.06	144.56	1.64161
DHX58	ENSG00000108771.12	protein_coding	10.73	17.59	1.63933
CCDC115	ENSG00000136710.9	protein_coding	34.09	55.88	1.63919
VPS51	ENSG00000149823.7	protein_coding	45.57	74.66	1.63836
ZNF775	ENSG00000196456.10	protein_coding	33.47	54.83	1.63818
SPAG4	ENSG00000061656.9	protein_coding	26.68	43.68	1.63718
MELTF	ENSG00000163975.11	protein_coding	36.38	59.51	1.63579
BCL2L11	ENSG00000153094.21	protein_coding	12.19	19.94	1.63577
WBP2	ENSG00000132471.11	protein_coding	137.04	223.98	1.63441
PNRC1	ENSG00000146278.10	protein_coding	30.52	49.87	1.63401
NHLRC3	ENSG00000188811.13	protein_coding	25.46	41.6	1.63394
UBN2	ENSG00000157741.14	protein_coding	5.19	8.48	1.63391
OGT	ENSG00000147162.13	protein_coding	61.97	101.25	1.63386
DHODH	ENSG00000102967.11	protein_coding	5.05	8.25	1.63366
CCDC57	ENSG00000176155.18	protein_coding	13.48	22.01	1.63279
QTRT1	ENSG00000213339.8	protein_coding	27.82	45.42	1.63264
CLIP4	ENSG00000115295.19	protein_coding	41.55	67.82	1.63225
TIPIN	ENSG00000075131.9	protein_coding	7.83	12.78	1.63218
MT-ND1	ENSG00000198888.2	protein_coding	1240.69	2024.46	1.63172
FAM193B	ENSG00000146067.15	protein_coding	40.44	65.92	1.63007
OS9	ENSG00000135506.15	protein_coding	155.91	254.11	1.62985
PCSK4	ENSG00000115257.15	protein_coding	5.13	8.36	1.62963
AMACR	ENSG00000242110.7	protein_coding	42.13	68.65	1.62948
IDUA	ENSG00000127415.12	protein_coding	13.46	21.93	1.62927
IMMP2L	ENSG00000184903.9	protein_coding	23.62	38.48	1.62913
AC138969.4	ENSG00000183889.12	protein_coding	76.64	124.82	1.62865
DTX3L	ENSG00000163840.9	protein_coding	16.47	26.82	1.62842
EGFL8	ENSG00000241404.6	protein_coding	5.48	8.91	1.62591
POLM	ENSG00000122678.15	protein_coding	8.17	13.28	1.62546
MSANTD4	ENSG00000170903.10	protein_coding	10.64	17.29	1.625
ZNF205	ENSG00000122386.10	protein_coding	8.28	13.45	1.6244
GOLGA3	ENSG00000090615.13	protein_coding	29.38	47.72	1.62423
ZFP36	ENSG00000128016.5	protein_coding	32.52	52.8	1.62362
PIAS1	ENSG00000033800.13	protein_coding	12.32	20	1.62338
IGIP	ENSG00000182700.4	protein_coding	6.2	10.06	1.62258
IFIT3	ENSG00000119917.13	protein_coding	16.44	26.66	1.62165
UQCC1	ENSG00000101019.21	protein_coding	40.87	66.27	1.62148
QRSL1	ENSG00000130348.11	protein_coding	6.02	9.76	1.62126
POLR1D	ENSG00000186184.16	protein_coding	88.54	143.29	1.61836
RNF114	ENSG00000124226.10	protein_coding	59.24	95.85	1.61799
GBP2	ENSG00000162645.12	protein_coding	16.87	27.29	1.61766
HSD17B8	ENSG00000204228.3	protein_coding	13.26	21.44	1.61689
DENND3	ENSG00000105339.10	protein_coding	61.18	98.85	1.61572
C14orf93	ENSG00000100802.14	protein_coding	7.13	11.52	1.61571
RTN4RL2	ENSG00000186907.7	protein_coding	13.6	21.96	1.61471
CLIP2	ENSG00000106665.15	protein_coding	22.06	35.61	1.61423
SLC29A4	ENSG00000164638.10	protein_coding	22.91	36.96	1.61327
COQ10A	ENSG00000135469.13	protein_coding	5.66	9.13	1.61307
MAP3K12	ENSG00000139625.12	protein_coding	10.92	17.6	1.61172
EIF4B	ENSG00000063046.17	protein_coding	247.25	398.49	1.61169
IQSEC2	ENSG00000124313.12	protein_coding	7.35	11.84	1.61088
EPS15L1	ENSG00000127527.13	protein_coding	18.99	30.58	1.61032
PLA2G6	ENSG00000184381.18	protein_coding	15	24.15	1.61
OR2A7	ENSG00000243896.3	protein_coding	5.8	9.33	1.60862
OCEL1	ENSG00000099330.8	protein_coding	32.13	51.68	1.60847
SEC31B	ENSG00000075826.16	protein_coding	6.11	9.82	1.6072
HSCB	ENSG00000100209.9	protein_coding	26.31	42.28	1.60699
GNA13	ENSG00000120063.9	protein_coding	31.22	50.16	1.60666
GATAD1	ENSG00000157259.6	protein_coding	58.03	93.22	1.60641
CERCAM	ENSG00000167123.18	protein_coding	38.83	62.27	1.60366
POLR2J3	ENSG00000168255.19	protein_coding	82.21	131.81	1.60333
PPOX	ENSG00000143224.17	protein_coding	20.88	33.47	1.60297
TCEAL1	ENSG00000172465.13	protein_coding	9.82	15.74	1.60285
BSCL2	ENSG00000168000.14	protein_coding	8.47	13.57	1.60213
PIGL	ENSG00000108474.16	protein_coding	29.82	47.76	1.60161
HMBOX1	ENSG00000147421.17	protein_coding	6.32	10.1	1.5981
ZNF84	ENSG00000198040.10	protein_coding	14.39	22.97	1.59625
SAFB2	ENSG00000130254.11	protein_coding	26.73	42.64	1.59521
RNF217	ENSG00000146373.16	protein_coding	6.12	9.76	1.59477
ZNF330	ENSG00000109445.10	protein_coding	31.9	50.85	1.59404
GPRC5A	ENSG00000013588.6	protein_coding	8.57	13.64	1.5916
ZNF773	ENSG00000152439.12	protein_coding	6.39	10.17	1.59155
ZNF667	ENSG00000198046.11	protein_coding	5.63	8.96	1.59147
WDR83	ENSG00000123154.11	protein_coding	9.29	14.78	1.59096
GPHN	ENSG00000171723.15	protein_coding	6.17	9.81	1.58995
EP300	ENSG00000100393.11	protein_coding	12.53	19.92	1.58978
CLMN	ENSG00000165959.11	protein_coding	5.24	8.33	1.58969
RNF149	ENSG00000163162.8	protein_coding	98.82	157.09	1.58966
KLF10	ENSG00000155090.14	protein_coding	54.19	86.09	1.58867
ZNF862	ENSG00000106479.10	protein_coding	9.6	15.25	1.58854
FKBP7	ENSG00000079150.17	protein_coding	29.02	46.09	1.58822
ENGASE	ENSG00000167280.16	protein_coding	11.55	18.34	1.58788
FAM53B	ENSG00000189319.13	protein_coding	5.62	8.92	1.58719
C16orf74	ENSG00000154102.10	protein_coding	28.46	45.16	1.58679
ETV3	ENSG00000117036.11	protein_coding	6.17	9.78	1.58509
C12orf73	ENSG00000204954.9	protein_coding	9.46	14.99	1.58457
STAP2	ENSG00000178078.11	protein_coding	29.5	46.74	1.58441
MAF	ENSG00000178573.6	protein_coding	76.55	121.28	1.58432
TTC17	ENSG00000052841.14	protein_coding	41.61	65.91	1.58399
TAF1D	ENSG00000166012.15	protein_coding	115.31	182.63	1.58382
DIP2C	ENSG00000151240.16	protein_coding	20.14	31.89	1.58342
ZNF506	ENSG00000081665.13	protein_coding	6.59	10.43	1.5827
IFRD1	ENSG00000006652.13	protein_coding	74.76	118.27	1.582
BCL2L2	ENSG00000129473.9	protein_coding	11.35	17.95	1.5815
RETSAT	ENSG00000042445.13	protein_coding	53.51	84.6	1.58101
CPEB4	ENSG00000113742.12	protein_coding	6.14	9.7	1.5798
WDR13	ENSG00000101940.17	protein_coding	31.23	49.33	1.57957
FAM228B	ENSG00000219626.8	protein_coding	14.28	22.53	1.57773
TNKS	ENSG00000173273.15	protein_coding	9.62	15.17	1.57692
LIPT1	ENSG00000144182.16	protein_coding	5.53	8.71	1.57505
ZCCHC2	ENSG00000141664.9	protein_coding	6.28	9.89	1.57484
CLDN15	ENSG00000106404.13	protein_coding	6.93	10.91	1.57431
FKTN	ENSG00000106692.13	protein_coding	21.76	34.25	1.57399
PARP12	ENSG00000059378.12	protein_coding	20.93	32.94	1.57382
TRIM22	ENSG00000132274.15	protein_coding	42.58	66.98	1.57304
CEBPD	ENSG00000221869.4	protein_coding	84.74	133.26	1.57257
CLEC2B	ENSG00000110852.4	protein_coding	9.12	14.34	1.57237
RAB40B	ENSG00000141542.10	protein_coding	7.72	12.12	1.56995
IMPDH2	ENSG00000178035.11	protein_coding	176.76	277.17	1.56806
ZNF133	ENSG00000125846.15	protein_coding	7.47	11.71	1.5676
PER3	ENSG00000049246.14	protein_coding	9.53	14.93	1.56663
ANKRD46	ENSG00000186106.11	protein_coding	10.98	17.2	1.56648
TOP3A	ENSG00000177302.14	protein_coding	14.87	23.29	1.56624
RNMT	ENSG00000101654.17	protein_coding	20.42	31.98	1.56611
KCTD7	ENSG00000243335.8	protein_coding	14	21.91	1.565
RBM33	ENSG00000184863.10	protein_coding	42.53	66.54	1.56454
BTBD3	ENSG00000132640.14	protein_coding	7.69	12.03	1.56437
OTUD1	ENSG00000165312.6	protein_coding	23.76	37.15	1.56355
SSR2	ENSG00000163479.13	protein_coding	256.53	401.09	1.56352
EXOC3	ENSG00000180104.15	protein_coding	40.74	63.69	1.56333
ZNF468	ENSG00000204604.9	protein_coding	6.03	9.42	1.56219
TRMT13	ENSG00000122435.9	protein_coding	6.3	9.83	1.56032
ZP3	ENSG00000188372.14	protein_coding	19.67	30.69	1.56024
METTL22	ENSG00000067365.14	protein_coding	22.28	34.72	1.55835
ZNF141	ENSG00000131127.13	protein_coding	6.49	10.11	1.55778
ERN1	ENSG00000178607.15	protein_coding	5.83	9.08	1.55746
C6orf48	ENSG00000204387.12	protein_coding	207.74	323.51	1.55728
CAMK2D	ENSG00000145349.16	protein_coding	15.09	23.47	1.55533
DNM2	ENSG00000079805.16	protein_coding	324.93	505.19	1.55477
FBXO17	ENSG00000269190.5	protein_coding	114.12	177.35	1.55407
ATP1B1	ENSG00000143153.12	protein_coding	554.85	862.2	1.55393
WDFY1	ENSG00000085449.14	protein_coding	81.34	126.38	1.55373
MRPS30	ENSG00000112996.10	protein_coding	50.85	78.94	1.55241
COL27A1	ENSG00000196739.14	protein_coding	31.9	49.51	1.55204
DECR2	ENSG00000242612.6	protein_coding	12.71	19.72	1.55153
RPUSD4	ENSG00000165526.8	protein_coding	14.29	22.17	1.55143
CARD10	ENSG00000100065.14	protein_coding	146.49	227.26	1.55137
HINFP	ENSG00000172273.12	protein_coding	9.09	14.1	1.55116
KLC4	ENSG00000137171.14	protein_coding	25.67	39.79	1.55006
ZNF487	ENSG00000243660.9	protein_coding	6.82	10.57	1.54985
KIAA0430	ENSG00000166783.20	protein_coding	17.08	26.47	1.54977
PPM1M	ENSG00000164088.17	protein_coding	7.06	10.94	1.54958
TRIM52	ENSG00000183718.5	protein_coding	7.77	12.04	1.54955
TK2	ENSG00000166548.15	protein_coding	10.56	16.36	1.54924
NBPF19	ENSG00000271383.6	protein_coding	10.19	15.78	1.54858
EFEMP2	ENSG00000172638.12	protein_coding	41.51	64.28	1.54854
USE1	ENSG00000053501.12	protein_coding	28.65	44.36	1.54834
PML	ENSG00000140464.19	protein_coding	42.3	65.48	1.54799
AGPAT4	ENSG00000026652.13	protein_coding	13.4	20.73	1.54701
LY6E	ENSG00000160932.10	protein_coding	80.75	124.91	1.54687
RBM5	ENSG00000003756.16	protein_coding	39.46	61.01	1.54612
ZBED6	ENSG00000257315.1	protein_coding	7.27	11.24	1.54608
ZNF337	ENSG00000130684.13	protein_coding	10.33	15.97	1.54598
PRELID3A	ENSG00000141391.13	protein_coding	5.81	8.98	1.54561
RPL18	ENSG00000063177.12	protein_coding	1405.8	2172.79	1.54559
ZKSCAN8	ENSG00000198315.10	protein_coding	10.14	15.67	1.54536
RIOK2	ENSG00000058729.10	protein_coding	6.64	10.26	1.54518
EIF3E	ENSG00000104408.9	protein_coding	530.82	820.2	1.54516
LRCH2	ENSG00000130224.14	protein_coding	6.35	9.81	1.54488
NFAT5	ENSG00000102908.20	protein_coding	5.66	8.74	1.54417
NAIF1	ENSG00000171169.8	protein_coding	6.6	10.19	1.54394
MICAL3	ENSG00000243156.7	protein_coding	53.97	83.25	1.54252
SYNE2	ENSG00000054654.15	protein_coding	8.02	12.37	1.54239
ADGRG1	ENSG00000205336.11	protein_coding	98.57	152	1.54205
GFPT2	ENSG00000131459.12	protein_coding	5.26	8.11	1.54183
LTA4H	ENSG00000111144.9	protein_coding	81.98	126.37	1.54147
NLE1	ENSG00000073536.17	protein_coding	12.77	19.68	1.54111
SCMH1	ENSG00000010803.16	protein_coding	24.27	37.39	1.54059
PQBP1	ENSG00000102103.15	protein_coding	31.79	48.97	1.54042
NDUFB5	ENSG00000136521.12	protein_coding	112.46	173.18	1.53993
AGAP4	ENSG00000188234.13	protein_coding	8.09	12.45	1.53894
ARRB2	ENSG00000141480.17	protein_coding	6.94	10.68	1.5389
SEPW1	ENSG00000178980.14	protein_coding	79.31	122.05	1.5389
ALKBH2	ENSG00000189046.10	protein_coding	21.77	33.48	1.5379
ACTR3B	ENSG00000133627.17	protein_coding	8.14	12.51	1.53686
EML3	ENSG00000149499.11	protein_coding	20.59	31.64	1.53667
TRIM25	ENSG00000121060.15	protein_coding	30.9	47.47	1.53625
CEP290	ENSG00000198707.14	protein_coding	16.87	25.91	1.53586
ZNF550	ENSG00000251369.8	protein_coding	8.93	13.71	1.53527
KANK2	ENSG00000197256.10	protein_coding	59.01	90.56	1.53466
LYST	ENSG00000143669.13	protein_coding	6.29	9.65	1.53418
CTSD	ENSG00000117984.13	protein_coding	1531.88	2350.16	1.53417
SGF29	ENSG00000176476.8	protein_coding	6.83	10.47	1.53294
RNF138	ENSG00000134758.13	protein_coding	16.02	24.53	1.53121
NISCH	ENSG00000010322.15	protein_coding	23.19	35.5	1.53083
BRAF	ENSG00000157764.12	protein_coding	16.28	24.92	1.53071
GALT	ENSG00000213930.11	protein_coding	10.31	15.78	1.53055
ID2	ENSG00000115738.9	protein_coding	172.96	264.61	1.52989
CEP68	ENSG00000011523.13	protein_coding	6.63	10.14	1.52941
DOCK6	ENSG00000130158.13	protein_coding	12.51	19.13	1.52918
TARSL2	ENSG00000185418.15	protein_coding	7.38	11.28	1.52846
USP54	ENSG00000166348.18	protein_coding	19.73	30.13	1.52712
PMP22	ENSG00000109099.13	protein_coding	64.88	99.04	1.52651
LRCH3	ENSG00000186001.12	protein_coding	23.28	35.52	1.52577
MBP	ENSG00000197971.14	protein_coding	15.05	22.95	1.52492
CCND1	ENSG00000110092.3	protein_coding	366.3	558.42	1.52449
ZNF226	ENSG00000167380.16	protein_coding	17.29	26.35	1.524
LINC00493	ENSG00000232388.4	protein_coding	78.38	119.39	1.52322
ABHD17A	ENSG00000129968.15	protein_coding	31.52	48	1.52284
POLR3D	ENSG00000168495.12	protein_coding	19.86	30.23	1.52216
SMOX	ENSG00000088826.17	protein_coding	39.24	59.72	1.52192
MAPK3	ENSG00000102882.11	protein_coding	61.54	93.63	1.52145
COG8	ENSG00000213380.14	protein_coding	8.43	12.82	1.52076
SLC16A5	ENSG00000170190.15	protein_coding	16.96	25.79	1.52064
ZNF224	ENSG00000267680.5	protein_coding	8.84	13.44	1.52036
SLC16A4	ENSG00000168679.17	protein_coding	30.51	46.35	1.51917
APOBEC3G	ENSG00000239713.7	protein_coding	8.21	12.47	1.51888
TGFB1	ENSG00000105329.9	protein_coding	141.98	215.51	1.51789
MRPL10	ENSG00000159111.12	protein_coding	30.63	46.41	1.51518
NRBP2	ENSG00000185189.16	protein_coding	31.33	47.47	1.51516
GM2A	ENSG00000196743.8	protein_coding	15.1	22.87	1.51457
ZNF316	ENSG00000205903.6	protein_coding	10.88	16.47	1.51379
AKAP9	ENSG00000127914.16	protein_coding	29.61	44.77	1.51199
NBPF9	ENSG00000269713.7	protein_coding	16.06	24.28	1.51183
TSC22D3	ENSG00000157514.16	protein_coding	82.38	124.46	1.5108
SENP7	ENSG00000138468.15	protein_coding	13.32	20.12	1.51051
SLC13A3	ENSG00000158296.13	protein_coding	9.35	14.12	1.51016
PDZK1IP1	ENSG00000162366.7	protein_coding	856.15	1292.87	1.5101
SERINC5	ENSG00000164300.15	protein_coding	7.06	10.66	1.50992
PLEKHA1	ENSG00000107679.14	protein_coding	47.41	71.57	1.5096
NBPF26	ENSG00000273136.6	protein_coding	21.49	32.43	1.50907
IDS	ENSG00000010404.17	protein_coding	75.36	113.71	1.50889
CIRBP	ENSG00000099622.13	protein_coding	155.87	235	1.50767
SIRT2	ENSG00000068903.19	protein_coding	22.18	33.44	1.50766
EID2B	ENSG00000176401.5	protein_coding	5.05	7.61	1.50693
MRPS2	ENSG00000122140.10	protein_coding	54.56	82.2	1.5066
RANBP10	ENSG00000141084.10	protein_coding	8.38	12.62	1.50597
VAT1	ENSG00000108828.15	protein_coding	156.23	235.19	1.50541
RP11-1212A22.4	ENSG00000233024.7	protein_coding	63.9	96.16	1.50485
WFDC3	ENSG00000124116.18	protein_coding	7.35	11.06	1.50476
CDK10	ENSG00000185324.21	protein_coding	47.46	71.41	1.50464
TPRG1L	ENSG00000158109.14	protein_coding	23.4	35.2	1.50427
EFHC1	ENSG00000096093.15	protein_coding	22.9	34.44	1.50393
TRIM5	ENSG00000132256.18	protein_coding	24.18	36.35	1.50331
PURA	ENSG00000185129.5	protein_coding	8.13	12.22	1.50308
ANKRD29	ENSG00000154065.16	protein_coding	6.76	10.16	1.50296
CRIPAK	ENSG00000179979.8	protein_coding	14.38	21.61	1.50278
CAMK2N1	ENSG00000162545.5	protein_coding	49.67	74.61	1.50211
SNX30	ENSG00000148158.16	protein_coding	7.89	11.85	1.5019
C16orf58	ENSG00000140688.16	protein_coding	119.66	179.66	1.50142
TRIM56	ENSG00000169871.12	protein_coding	37.36	56.08	1.50107
PHKA1	ENSG00000067177.14	protein_coding	9.72	14.59	1.50103
AHR	ENSG00000106546.12	protein_coding	17.27	25.92	1.50087
ARHGAP42	ENSG00000165895.17	protein_coding	7.97	11.96	1.50063
KMT2B	ENSG00000272333.5	protein_coding	9.83	14.75	1.50051
RPL13	ENSG00000167526.13	protein_coding	4985.29	7476.06	1.49962
RASA3	ENSG00000185989.10	protein_coding	14.61	21.87	1.49692
NET1	ENSG00000173848.18	protein_coding	20.82	31.15	1.49616
TAGLN	ENSG00000149591.16	protein_coding	5.08	7.6	1.49606
COG8	ENSG00000272617.2	protein_coding	8.57	12.82	1.49592
INSIG2	ENSG00000125629.14	protein_coding	31.68	47.39	1.4959
SYF2	ENSG00000117614.9	protein_coding	57.22	85.58	1.49563
ECHDC2	ENSG00000121310.16	protein_coding	66.29	99.12	1.49525
NPIPB3	ENSG00000169246.16	protein_coding	22.16	33.12	1.49458
ZNF263	ENSG00000006194.9	protein_coding	28.44	42.5	1.49437
WBP1	ENSG00000239779.6	protein_coding	68.66	102.6	1.49432
CIZ1	ENSG00000148337.20	protein_coding	72.45	108.26	1.49427
CMTM3	ENSG00000140931.19	protein_coding	33.53	50.1	1.49418
GPN1	ENSG00000198522.13	protein_coding	36.63	54.7	1.49331
C18orf21	ENSG00000141428.16	protein_coding	10.75	16.03	1.49116
SRRM1	ENSG00000133226.16	protein_coding	102.6	152.98	1.49103
RPL24	ENSG00000114391.12	protein_coding	1628.51	2427.84	1.49084
DNASE1	ENSG00000213918.10	protein_coding	5.87	8.75	1.49063
EIF2D	ENSG00000143486.15	protein_coding	52.95	78.9	1.49008
IRAK2	ENSG00000134070.4	protein_coding	5.98	8.91	1.48997
RGL3	ENSG00000205517.12	protein_coding	21.14	31.49	1.48959
EEF1A1	ENSG00000156508.17	protein_coding	8019.65	11943.3	1.48925
KLF4	ENSG00000136826.14	protein_coding	5.3	7.89	1.48868
LRRC75B	ENSG00000178026.12	protein_coding	13.52	20.12	1.48817
ARHGEF10L	ENSG00000074964.16	protein_coding	11.62	17.29	1.48795
RPL31	ENSG00000071082.10	protein_coding	3521.15	5238.44	1.48771
TNFRSF14	ENSG00000157873.17	protein_coding	11.58	17.22	1.48705
C10orf2	ENSG00000107815.7	protein_coding	7.19	10.69	1.48679
CHIC1	ENSG00000204116.11	protein_coding	5.87	8.72	1.48552
CENPV	ENSG00000166582.9	protein_coding	15.33	22.77	1.48532
HMG20A	ENSG00000140382.14	protein_coding	29.67	44.06	1.485
SUPV3L1	ENSG00000156502.13	protein_coding	26.13	38.8	1.48488
KLHL20	ENSG00000076321.10	protein_coding	13.1	19.45	1.48473
FAM227B	ENSG00000166262.15	protein_coding	5.89	8.74	1.48387
HOMER3	ENSG00000051128.18	protein_coding	45.06	66.84	1.48336
SETDB1	ENSG00000143379.12	protein_coding	23.83	35.32	1.48217
RYBP	ENSG00000163602.9	protein_coding	9.42	13.96	1.48195
NBPF15	ENSG00000266338.6	protein_coding	24.87	36.85	1.4817
CUL7	ENSG00000044090.8	protein_coding	39	57.78	1.48154
TRAPPC2B	ENSG00000256060.2	protein_coding	8.66	12.83	1.48152
NFXL1	ENSG00000170448.11	protein_coding	11.28	16.7	1.4805
SLC25A36	ENSG00000114120.11	protein_coding	62.91	93.1	1.47989
IFI16	ENSG00000163565.18	protein_coding	72.02	106.57	1.47973
INTS6L	ENSG00000165359.14	protein_coding	5.88	8.7	1.47959
MCRIP2	ENSG00000172366.19	protein_coding	43.94	65.01	1.47952
C19orf44	ENSG00000105072.8	protein_coding	5.89	8.71	1.47878
FZD8	ENSG00000177283.6	protein_coding	9.64	14.25	1.47822
C11orf57	ENSG00000150776.17	protein_coding	16.26	24.03	1.47786
MPI	ENSG00000178802.17	protein_coding	23.16	34.21	1.47712
KIAA1109	ENSG00000138688.15	protein_coding	24.4	36.04	1.47705
SASH1	ENSG00000111961.17	protein_coding	7.35	10.85	1.47619
PNISR	ENSG00000132424.14	protein_coding	59.28	87.49	1.47588
TIGD5	ENSG00000179886.5	protein_coding	7.44	10.98	1.47581
ZNF277	ENSG00000198839.9	protein_coding	38.83	57.29	1.47541
MLX	ENSG00000108788.11	protein_coding	19.34	28.53	1.47518
NIPAL3	ENSG00000001461.16	protein_coding	23.19	34.19	1.47434
TMEM63A	ENSG00000196187.11	protein_coding	14.56	21.46	1.4739
WDR6	ENSG00000178252.17	protein_coding	47.37	69.8	1.47351
PRSS16	ENSG00000112812.15	protein_coding	7.66	11.28	1.47258
ETHE1	ENSG00000105755.7	protein_coding	27.64	40.68	1.47178
CLYBL	ENSG00000125246.15	protein_coding	29.9	44	1.47157
MBTD1	ENSG00000011258.15	protein_coding	7.63	11.22	1.47051
ERMAP	ENSG00000164010.13	protein_coding	5.53	8.13	1.47016
KIAA1217	ENSG00000120549.17	protein_coding	19.64	28.87	1.46996
ALKBH4	ENSG00000160993.3	protein_coding	8.07	11.86	1.46964
ATF5	ENSG00000169136.9	protein_coding	7.29	10.71	1.46914
MOAP1	ENSG00000165943.4	protein_coding	26.65	39.14	1.46867
PAN2	ENSG00000135473.14	protein_coding	50.18	73.69	1.46851
B9D2	ENSG00000123810.7	protein_coding	6.15	9.03	1.46829
LRRC27	ENSG00000148814.17	protein_coding	9.61	14.11	1.46826
MANBA	ENSG00000109323.8	protein_coding	21.19	31.11	1.46815
CNNM2	ENSG00000148842.17	protein_coding	5.54	8.13	1.46751
ZNF696	ENSG00000185730.7	protein_coding	5.82	8.54	1.46735
PREX2	ENSG00000046889.18	protein_coding	26.57	38.98	1.46707
PRAME	ENSG00000185686.17	protein_coding	18.9	27.72	1.46667
HEMK1	ENSG00000114735.9	protein_coding	15.29	22.42	1.46632
MEIS2	ENSG00000134138.19	protein_coding	11.25	16.49	1.46578
HKR1	ENSG00000181666.17	protein_coding	16.67	24.43	1.46551
PLAGL1	ENSG00000118495.18	protein_coding	32.4	47.48	1.46543
ZNRD1	ENSG00000066379.14	protein_coding	21.28	31.18	1.46523
THRA	ENSG00000126351.12	protein_coding	6.88	10.08	1.46512
RPL28	ENSG00000108107.13	protein_coding	882.44	1292.62	1.46482
SLC25A30	ENSG00000174032.16	protein_coding	18.68	27.34	1.4636
BTN3A3	ENSG00000111801.15	protein_coding	18.86	27.6	1.46341
GADD45B	ENSG00000099860.8	protein_coding	183.34	268.07	1.46215
MYNN	ENSG00000085274.15	protein_coding	8.81	12.88	1.46198
ULK1	ENSG00000177169.9	protein_coding	32.63	47.7	1.46184
LIMS1	ENSG00000169756.16	protein_coding	67.5	98.67	1.46178
DNAJB9	ENSG00000128590.4	protein_coding	28.63	41.85	1.46175
MTHFS	ENSG00000136371.10	protein_coding	16.95	24.75	1.46018
SPATA18	ENSG00000163071.10	protein_coding	12.94	18.88	1.45904
BAZ2B	ENSG00000123636.17	protein_coding	18.36	26.78	1.45861
LINS1	ENSG00000140471.16	protein_coding	5.3	7.73	1.45849
FTL	ENSG00000087086.14	protein_coding	2840.54	4142.63	1.4584
SLC12A4	ENSG00000124067.16	protein_coding	35.07	51.14	1.45823
IP6K2	ENSG00000068745.14	protein_coding	37.98	55.34	1.45708
FBXO41	ENSG00000163013.11	protein_coding	7.44	10.84	1.45699
NPRL2	ENSG00000114388.12	protein_coding	15.83	23.06	1.45673
METTL16	ENSG00000127804.12	protein_coding	11.47	16.7	1.45597
POU6F1	ENSG00000184271.16	protein_coding	10.23	14.89	1.45552
GUSB	ENSG00000169919.16	protein_coding	189.05	275.15	1.45544
GARNL3	ENSG00000136895.18	protein_coding	8.59	12.5	1.45518
F12	ENSG00000131187.9	protein_coding	17.87	25.98	1.45383
RNF32	ENSG00000105982.16	protein_coding	7.65	11.12	1.45359
BCKDHA	ENSG00000248098.11	protein_coding	42.89	62.33	1.45325
RBM15	ENSG00000162775.14	protein_coding	8.35	12.13	1.45269
ZNF25	ENSG00000175395.15	protein_coding	12.4	18.01	1.45242
LRIF1	ENSG00000121931.15	protein_coding	11.23	16.31	1.45236
PLD3	ENSG00000105223.19	protein_coding	186.6	271	1.4523
RFNG	ENSG00000169733.11	protein_coding	41.06	59.63	1.45226
FAM46A	ENSG00000112773.15	protein_coding	8.41	12.21	1.45184
NPEPPS	ENSG00000141279.15	protein_coding	95.93	139.22	1.45127
WDFY3	ENSG00000163625.15	protein_coding	14.61	21.2	1.45106
KIAA0907	ENSG00000132680.10	protein_coding	29.82	43.27	1.45104
FAM219B	ENSG00000178761.14	protein_coding	22.09	32.05	1.45088
TMEM159	ENSG00000011638.10	protein_coding	44.72	64.86	1.45036
NOA1	ENSG00000084092.6	protein_coding	16.19	23.48	1.45028
LPCAT1	ENSG00000153395.9	protein_coding	289.42	419.71	1.45018
EPB41L4A	ENSG00000129595.12	protein_coding	6.8	9.86	1.45
SPARC	ENSG00000113140.10	protein_coding	718.64	1041.97	1.44992
MEF2D	ENSG00000116604.17	protein_coding	17.36	25.17	1.44988
NAB1	ENSG00000138386.16	protein_coding	27.6	40	1.44928
MARK4	ENSG00000007047.14	protein_coding	19.2	27.81	1.44844
ZNF841	ENSG00000197608.11	protein_coding	7.61	11.02	1.44809
RUFY3	ENSG00000018189.12	protein_coding	19.68	28.49	1.44766
METTL9	ENSG00000197006.13	protein_coding	101.64	147.12	1.44746
PTBP2	ENSG00000117569.18	protein_coding	9.83	14.22	1.44659
CNOT7	ENSG00000198791.11	protein_coding	29.94	43.3	1.44623
FASTKD1	ENSG00000138399.17	protein_coding	14.35	20.74	1.4453
IRX3	ENSG00000177508.11	protein_coding	14.12	20.4	1.44476
BTAF1	ENSG00000095564.13	protein_coding	34.84	50.32	1.44432
FMNL2	ENSG00000157827.19	protein_coding	21.01	30.34	1.44407
TLN2	ENSG00000171914.15	protein_coding	9.36	13.51	1.44338
FGD4	ENSG00000139132.14	protein_coding	5.01	7.23	1.44311
C2CD2	ENSG00000157617.16	protein_coding	12.89	18.6	1.44298
EEF2	ENSG00000167658.15	protein_coding	1508.43	2176.4	1.44282
VAMP2	ENSG00000220205.8	protein_coding	26.08	37.61	1.4421
TAOK3	ENSG00000135090.13	protein_coding	15.11	21.79	1.44209
SPSB1	ENSG00000171621.13	protein_coding	13.56	19.55	1.44174
RILPL1	ENSG00000188026.12	protein_coding	13.56	19.55	1.44174
CAMTA2	ENSG00000108509.20	protein_coding	35.17	50.68	1.441
STK36	ENSG00000163482.11	protein_coding	23.91	34.45	1.44082
CCDC102A	ENSG00000135736.5	protein_coding	5.9	8.5	1.44068
MMP2	ENSG00000087245.12	protein_coding	67.85	97.67	1.4395
C2orf49	ENSG00000135974.9	protein_coding	15.41	22.18	1.43933
LURAP1L	ENSG00000153714.5	protein_coding	5.19	7.47	1.43931
LTBP3	ENSG00000168056.15	protein_coding	53.38	76.83	1.4393
C16orf13	ENSG00000130731.15	protein_coding	215.31	309.85	1.43909
KAT14	ENSG00000149474.13	protein_coding	5.65	8.13	1.43894
PMM1	ENSG00000100417.11	protein_coding	111.37	160.17	1.43818
SH2D3A	ENSG00000125731.12	protein_coding	6.3	9.06	1.4381
NPIPB4	ENSG00000185864.16	protein_coding	22.21	31.94	1.43809
MC1R	ENSG00000258839.2	protein_coding	5.39	7.75	1.43785
PIK3R1	ENSG00000145675.14	protein_coding	15.19	21.84	1.43779
ZNF197	ENSG00000186448.14	protein_coding	6.93	9.96	1.43723
RNASET2	ENSG00000026297.15	protein_coding	958.79	1377.88	1.4371
RPS27	ENSG00000177954.11	protein_coding	5610.29	8057.64	1.43623
AHSA2	ENSG00000173209.22	protein_coding	52.29	75.08	1.43584
GPC6	ENSG00000183098.10	protein_coding	29.53	42.4	1.43583
ATF4	ENSG00000128272.14	protein_coding	602.38	864.84	1.43571
TRMT44	ENSG00000155275.18	protein_coding	8.66	12.43	1.43533
FAM175A	ENSG00000163322.13	protein_coding	14.74	21.15	1.43487
CBFA2T2	ENSG00000078699.21	protein_coding	14.56	20.88	1.43407
ATP9A	ENSG00000054793.13	protein_coding	10.28	14.73	1.43288
GBE1	ENSG00000114480.12	protein_coding	35.07	50.22	1.43199
TPST2	ENSG00000128294.15	protein_coding	35.94	51.45	1.43155
PARS2	ENSG00000162396.5	protein_coding	5.54	7.93	1.43141
PLP2	ENSG00000102007.10	protein_coding	338.57	484.57	1.43123
PHPT1	ENSG00000054148.17	protein_coding	389.01	556.72	1.43112
HEXDC	ENSG00000169660.15	protein_coding	14.8	21.18	1.43108
AKAP8	ENSG00000105127.8	protein_coding	12.07	17.27	1.43082
PM20D2	ENSG00000146281.5	protein_coding	9.82	14.05	1.43075
APOPT1	ENSG00000256053.7	protein_coding	57.24	81.88	1.43047
SLC9A7	ENSG00000065923.9	protein_coding	7.37	10.53	1.42877
CCDC191	ENSG00000163617.10	protein_coding	6.61	9.44	1.42814
DMPK	ENSG00000104936.17	protein_coding	18.6	26.56	1.42796
AL513523.2	ENSG00000279767.1	protein_coding	5.83	8.32	1.4271
UVSSA	ENSG00000163945.15	protein_coding	20.84	29.74	1.42706
GFPT1	ENSG00000198380.12	protein_coding	59.96	85.56	1.42695
PCMTD1	ENSG00000168300.13	protein_coding	57.04	81.38	1.42672
ZNF408	ENSG00000175213.2	protein_coding	6.45	9.2	1.42636
CLK4	ENSG00000113240.12	protein_coding	17.83	25.43	1.42625
PLPPR2	ENSG00000105520.10	protein_coding	26.92	38.39	1.42608
PABPC4	ENSG00000090621.13	protein_coding	216.9	309.22	1.42563
RPL12	ENSG00000197958.12	protein_coding	3507.89	4998.59	1.42496
TCP11L2	ENSG00000166046.10	protein_coding	7.77	11.07	1.42471
KIAA1671	ENSG00000197077.13	protein_coding	19.31	27.51	1.42465
TMEM120A	ENSG00000189077.10	protein_coding	84.44	120.28	1.42444
NOL8	ENSG00000198000.11	protein_coding	34.03	48.46	1.42404
PTDSS2	ENSG00000174915.11	protein_coding	18.92	26.94	1.42389
ADM2	ENSG00000128165.8	protein_coding	13.57	19.32	1.42373
MTR	ENSG00000116984.12	protein_coding	12.36	17.58	1.42233
HOXC10	ENSG00000180818.4	protein_coding	14.14	20.11	1.42221
ZRSR2	ENSG00000169249.12	protein_coding	9.17	13.04	1.42203
SOX4	ENSG00000124766.6	protein_coding	27.94	39.73	1.42198
HDAC11	ENSG00000163517.14	protein_coding	14.86	21.13	1.42194
EARS2	ENSG00000103356.15	protein_coding	27.75	39.45	1.42162
GOLGA8A	ENSG00000175265.17	protein_coding	30.72	43.67	1.42155
BHLHE41	ENSG00000123095.5	protein_coding	42.54	60.46	1.42125
ZNF646	ENSG00000167395.10	protein_coding	7.2	10.23	1.42083
TMEM43	ENSG00000170876.7	protein_coding	48.22	68.51	1.42078
ZNF514	ENSG00000144026.11	protein_coding	10.95	15.55	1.42009
TCEA1	ENSG00000187735.12	protein_coding	220.16	312.63	1.42001
HEXA	ENSG00000213614.9	protein_coding	155.16	220.1	1.41854
BLVRB	ENSG00000090013.9	protein_coding	148.19	210.16	1.41818
WDR27	ENSG00000184465.15	protein_coding	34.53	48.96	1.4179
FXYD5	ENSG00000089327.14	protein_coding	149.33	211.57	1.4168
SCAMP4	ENSG00000227500.9	protein_coding	26.74	37.87	1.41623
SLC25A38	ENSG00000144659.10	protein_coding	18.03	25.53	1.41597
TLR3	ENSG00000164342.12	protein_coding	8.68	12.29	1.4159
MID1IP1	ENSG00000165175.15	protein_coding	35.79	50.64	1.41492
SP140L	ENSG00000185404.16	protein_coding	9.39	13.28	1.41427
WDR75	ENSG00000115368.9	protein_coding	24.59	34.77	1.41399
MED12	ENSG00000184634.15	protein_coding	9.25	13.07	1.41297
CCNT2	ENSG00000082258.12	protein_coding	11.14	15.74	1.41293
CCAR1	ENSG00000060339.13	protein_coding	23.73	33.52	1.41256
ASAP3	ENSG00000088280.18	protein_coding	8.39	11.85	1.4124
GALNT11	ENSG00000178234.12	protein_coding	31.65	44.7	1.41232
RPL18A	ENSG00000105640.12	protein_coding	2337.05	3297.93	1.41115
MIEF2	ENSG00000177427.12	protein_coding	8.54	12.05	1.41101
STK19	ENSG00000204344.14	protein_coding	22.19	31.31	1.411
SRRM2	ENSG00000167978.16	protein_coding	221.23	312.02	1.41039
ZBTB44	ENSG00000196323.11	protein_coding	13.11	18.49	1.41037
GPRC5B	ENSG00000167191.11	protein_coding	28.27	39.87	1.41033
ACTL6A	ENSG00000136518.16	protein_coding	72.1	101.62	1.40943
MYO18A	ENSG00000196535.15	protein_coding	6.97	9.82	1.4089
NBPF14	ENSG00000270629.5	protein_coding	24.07	33.89	1.40798
PITPNM2	ENSG00000090975.12	protein_coding	9.74	13.71	1.4076
EDN1	ENSG00000078401.6	protein_coding	69.62	97.98	1.40735
ARL14EP	ENSG00000152219.4	protein_coding	9.65	13.58	1.40725
SIN3B	ENSG00000127511.9	protein_coding	32.64	45.92	1.40686
IL1RAP	ENSG00000196083.9	protein_coding	23.4	32.92	1.40684
ZNF532	ENSG00000074657.13	protein_coding	12.49	17.57	1.40673
CLUAP1	ENSG00000103351.12	protein_coding	20.12	28.3	1.40656
ARHGEF2	ENSG00000116584.17	protein_coding	43.47	61.13	1.40626
HDDC3	ENSG00000184508.10	protein_coding	10.11	14.21	1.40554
GJA1	ENSG00000152661.7	protein_coding	28.05	39.42	1.40535
TMEM256	ENSG00000205544.3	protein_coding	112.24	157.68	1.40485
DALRD3	ENSG00000178149.16	protein_coding	38.11	53.51	1.40409
NF1	ENSG00000196712.16	protein_coding	17.63	24.75	1.40386
NPM1	ENSG00000181163.13	protein_coding	1335.81	1875.23	1.40381
PHC3	ENSG00000173889.15	protein_coding	15.28	21.45	1.4038
TEN1	ENSG00000257949.6	protein_coding	15.53	21.8	1.40373
HEATR5B	ENSG00000008869.11	protein_coding	8.57	12.03	1.40373
SNRNP48	ENSG00000168566.12	protein_coding	11.48	16.11	1.40331
TYW5	ENSG00000162971.10	protein_coding	6.95	9.75	1.40288
TRIM4	ENSG00000146833.15	protein_coding	32.81	46.01	1.40232
RAB40C	ENSG00000197562.9	protein_coding	35.68	50.03	1.40219
HMOX1	ENSG00000100292.16	protein_coding	24.01	33.66	1.40192
FOXRED2	ENSG00000100350.14	protein_coding	6.82	9.56	1.40176
ELF3	ENSG00000163435.15	protein_coding	95.45	133.75	1.40126
ZNF121	ENSG00000197961.11	protein_coding	8.75	12.26	1.40114
CDC16	ENSG00000130177.14	protein_coding	45.33	63.5	1.40084
ZFYVE1	ENSG00000165861.13	protein_coding	5.59	7.83	1.40072
CGNL1	ENSG00000128849.10	protein_coding	13.82	19.35	1.40014
CHD2	ENSG00000173575.19	protein_coding	35.14	49.2	1.40011
RPS5	ENSG00000083845.8	protein_coding	958.3	1341.71	1.40009
YIPF2	ENSG00000130733.10	protein_coding	199.74	279.64	1.40002
RASEF	ENSG00000165105.9	protein_coding	12.3	17.22	1.4
TIMM44	ENSG00000104980.7	protein_coding	45.96	64.34	1.39991
RAB24	ENSG00000169228.13	protein_coding	43.78	61.27	1.3995
ZNF672	ENSG00000171161.12	protein_coding	16.64	23.28	1.39904
NCBP3	ENSG00000074356.16	protein_coding	22.13	30.95	1.39855
IER5L	ENSG00000188483.7	protein_coding	38.7	54.1	1.39793
EIF1B	ENSG00000114784.3	protein_coding	43.85	61.27	1.39726
NAA25	ENSG00000111300.9	protein_coding	13.58	18.97	1.39691
RAB11FIP1	ENSG00000156675.15	protein_coding	19.51	27.25	1.39672
GRN	ENSG00000030582.16	protein_coding	230.45	321.82	1.39649
RTCA	ENSG00000137996.12	protein_coding	50.96	71.16	1.39639
PLD2	ENSG00000129219.13	protein_coding	14.03	19.59	1.39629
ATF3	ENSG00000162772.16	protein_coding	31.83	44.44	1.39617
BCAS3	ENSG00000141376.21	protein_coding	7.93	11.07	1.39596
NGDN	ENSG00000129460.15	protein_coding	13.93	19.44	1.39555
ZMAT5	ENSG00000100319.12	protein_coding	21.7	30.28	1.39539
OXR1	ENSG00000164830.18	protein_coding	44.92	62.68	1.39537
SFR1	ENSG00000156384.14	protein_coding	7.92	11.05	1.3952
CREBZF	ENSG00000137504.13	protein_coding	30.82	42.99	1.39487
VPS8	ENSG00000156931.15	protein_coding	11.72	16.34	1.3942
MRPL32	ENSG00000106591.3	protein_coding	41.37	57.67	1.39401
POLI	ENSG00000101751.10	protein_coding	12.26	17.09	1.39396
SMIM3	ENSG00000256235.1	protein_coding	69.2	96.42	1.39335
HAUS4	ENSG00000092036.17	protein_coding	47.77	66.51	1.3923
PI4KB	ENSG00000143393.16	protein_coding	26.26	36.56	1.39223
RP11-231C14.4	ENSG00000169203.16	protein_coding	16.88	23.5	1.39218
DVL2	ENSG00000004975.11	protein_coding	23.67	32.93	1.39121
CASP4	ENSG00000196954.13	protein_coding	95.5	132.85	1.3911
ZNF526	ENSG00000167625.10	protein_coding	7.39	10.28	1.39107
RPS8	ENSG00000142937.11	protein_coding	2351.58	3271.03	1.39099
ESF1	ENSG00000089048.14	protein_coding	19.01	26.44	1.39085
TBL1XR1	ENSG00000177565.16	protein_coding	77.73	108.11	1.39084
ZNF160	ENSG00000170949.17	protein_coding	9.91	13.78	1.39051
SETD5	ENSG00000168137.15	protein_coding	53.32	74.12	1.3901
ZCCHC14	ENSG00000140948.11	protein_coding	7.44	10.34	1.38978
EEFSEC	ENSG00000132394.10	protein_coding	9.53	13.24	1.3893
NOTCH2NL	ENSG00000264343.5	protein_coding	44.51	61.82	1.3889
DENND4C	ENSG00000137145.20	protein_coding	29.99	41.65	1.3888
NIFK	ENSG00000155438.11	protein_coding	33.06	45.9	1.38838
RPL10	ENSG00000147403.16	protein_coding	3567.81	4952.54	1.38812
HACE1	ENSG00000085382.11	protein_coding	10.05	13.95	1.38806
KMT2D	ENSG00000167548.14	protein_coding	11.91	16.53	1.38791
DDX31	ENSG00000125485.17	protein_coding	14.26	19.79	1.3878
PRICKLE3	ENSG00000012211.12	protein_coding	11.76	16.32	1.38776
FHOD3	ENSG00000134775.15	protein_coding	16.66	23.11	1.38715
ARHGAP19	ENSG00000213390.10	protein_coding	11.34	15.73	1.38713
BHLHE40	ENSG00000134107.4	protein_coding	189.04	262.21	1.38706
SLC25A29	ENSG00000197119.12	protein_coding	18.04	25.02	1.38692
COPS2	ENSG00000166200.14	protein_coding	52.18	72.36	1.38674
IKZF5	ENSG00000095574.11	protein_coding	10.66	14.77	1.38555
JUNB	ENSG00000171223.5	protein_coding	104.76	145.14	1.38545
C10orf10	ENSG00000165507.8	protein_coding	191.62	265.45	1.38529
COL6A2	ENSG00000142173.14	protein_coding	54.05	74.87	1.3852
MCCC1	ENSG00000078070.12	protein_coding	19.11	26.47	1.38514
FAN1	ENSG00000198690.9	protein_coding	14.18	19.64	1.38505
PTPN2	ENSG00000175354.18	protein_coding	20.11	27.85	1.38488
BRWD3	ENSG00000165288.10	protein_coding	6.55	9.07	1.38473
ZNF317	ENSG00000130803.14	protein_coding	16.03	22.19	1.38428
MSH5-SAPCD1	ENSG00000255152.8	protein_coding	7.58	10.49	1.38391
RPL9	ENSG00000163682.15	protein_coding	1109.17	1534.55	1.38351
ZNF692	ENSG00000171163.15	protein_coding	28.02	38.76	1.3833
NEU1	ENSG00000204386.10	protein_coding	44.82	61.98	1.38286
ZNF436	ENSG00000125945.14	protein_coding	14.97	20.7	1.38277
POLG2	ENSG00000256525.6	protein_coding	17.17	23.74	1.38264
GNB3	ENSG00000111664.10	protein_coding	5.31	7.34	1.3823
TUBD1	ENSG00000108423.14	protein_coding	6.07	8.39	1.38221
RNF213	ENSG00000173821.19	protein_coding	63.98	88.43	1.38215
SLFN5	ENSG00000166750.9	protein_coding	13.95	19.28	1.38208
RBM41	ENSG00000089682.16	protein_coding	12.83	17.73	1.38192
NEK3	ENSG00000136098.16	protein_coding	12.34	17.05	1.38169
NACA	ENSG00000196531.10	protein_coding	1637.24	2261.42	1.38124
RPF2	ENSG00000197498.12	protein_coding	27.28	37.68	1.38123
ZSCAN30	ENSG00000186814.12	protein_coding	16.08	22.21	1.38122
PGPEP1	ENSG00000130517.13	protein_coding	16.61	22.94	1.3811
UBA7	ENSG00000182179.11	protein_coding	24.38	33.67	1.38105
PPP2R5A	ENSG00000066027.11	protein_coding	28.21	38.95	1.38072
RARG	ENSG00000172819.16	protein_coding	20.09	27.73	1.38029
C8orf44	ENSG00000213865.7	protein_coding	20.92	28.87	1.38002
THOC1	ENSG00000079134.11	protein_coding	17.87	24.66	1.37997
LENG8	ENSG00000167615.16	protein_coding	111	153.1	1.37928
ACTA2	ENSG00000107796.13	protein_coding	44.65	61.58	1.37917
DDX60L	ENSG00000181381.13	protein_coding	7.47	10.3	1.37885
RARA	ENSG00000131759.17	protein_coding	31.31	43.17	1.37879
RBM22	ENSG00000086589.11	protein_coding	32.16	44.34	1.37873
BTG2	ENSG00000159388.5	protein_coding	10.96	15.11	1.37865
EPS8L2	ENSG00000177106.14	protein_coding	224.69	309.62	1.37799
RBPMS	ENSG00000157110.15	protein_coding	113.08	155.82	1.37796
ZNF384	ENSG00000126746.17	protein_coding	33	45.44	1.37697
FOXK1	ENSG00000164916.10	protein_coding	14.84	20.43	1.37668
SPSB3	ENSG00000162032.15	protein_coding	36.03	49.6	1.37663
CBLB	ENSG00000114423.18	protein_coding	7.07	9.73	1.37624
RPS19	ENSG00000105372.6	protein_coding	2364.51	3252.71	1.37564
GLOD4	ENSG00000167699.13	protein_coding	39.72	54.64	1.37563
FBXO28	ENSG00000143756.11	protein_coding	19.23	26.45	1.37546
SENP2	ENSG00000163904.12	protein_coding	19.35	26.61	1.37519
ARHGEF7	ENSG00000102606.17	protein_coding	21.38	29.4	1.37512
GOLGA4	ENSG00000144674.16	protein_coding	50.46	69.36	1.37455
NIT1	ENSG00000158793.13	protein_coding	37.98	52.2	1.37441
MRC2	ENSG00000011028.13	protein_coding	232.81	319.88	1.374
LMO7	ENSG00000136153.19	protein_coding	35.59	48.89	1.3737
SERINC2	ENSG00000168528.11	protein_coding	40.41	55.5	1.37342
ANGEL2	ENSG00000174606.13	protein_coding	19.78	27.16	1.3731
RARRES2	ENSG00000106538.9	protein_coding	1825.58	2506.62	1.37305
PHF1	ENSG00000112511.17	protein_coding	29.57	40.59	1.37268
STAT2	ENSG00000170581.13	protein_coding	74.46	102.15	1.37188
DUSP16	ENSG00000111266.8	protein_coding	10.69	14.66	1.37138
STX12	ENSG00000117758.13	protein_coding	23.86	32.72	1.37133
POGZ	ENSG00000143442.21	protein_coding	17.89	24.53	1.37116
FAM49A	ENSG00000197872.11	protein_coding	9.79	13.42	1.37079
ZMYM5	ENSG00000132950.18	protein_coding	9.28	12.72	1.37069
MRPL45	ENSG00000278845.4	protein_coding	26.9	36.87	1.37063
PTAR1	ENSG00000188647.12	protein_coding	39.96	54.77	1.37062
INAFM1	ENSG00000257704.3	protein_coding	12.97	17.77	1.37008
ZC3H6	ENSG00000188177.13	protein_coding	7.08	9.7	1.37006
MAFF	ENSG00000185022.11	protein_coding	7.65	10.48	1.36993
PURB	ENSG00000146676.7	protein_coding	10.29	14.09	1.36929
IFNGR1	ENSG00000027697.13	protein_coding	21.43	29.34	1.36911
KLHDC10	ENSG00000128607.13	protein_coding	28.76	39.36	1.36857
C12orf57	ENSG00000111678.10	protein_coding	240.66	329.28	1.36824
CEBPB	ENSG00000172216.5	protein_coding	58.54	80.08	1.36795
ANKRD12	ENSG00000101745.16	protein_coding	16.58	22.68	1.36791
CLN3	ENSG00000188603.17	protein_coding	21.21	29.01	1.36775
BMP2	ENSG00000125845.6	protein_coding	5.53	7.56	1.36709
PACS2	ENSG00000179364.13	protein_coding	18.09	24.73	1.36705
PROS1	ENSG00000184500.14	protein_coding	18.12	24.77	1.367
NELFA	ENSG00000185049.13	protein_coding	31.45	42.98	1.36661
OFD1	ENSG00000046651.14	protein_coding	17.16	23.45	1.36655
SSBP4	ENSG00000130511.15	protein_coding	29.66	40.53	1.36649
LPIN3	ENSG00000132793.11	protein_coding	20.07	27.41	1.36572
POLE4	ENSG00000115350.11	protein_coding	21.22	28.98	1.36569
BCL7A	ENSG00000110987.8	protein_coding	16.75	22.87	1.36537
ALKBH7	ENSG00000125652.7	protein_coding	65.48	89.37	1.36484
C1orf52	ENSG00000162642.13	protein_coding	28.54	38.94	1.3644
CSNK2A2	ENSG00000070770.8	protein_coding	55	75.03	1.36418
GXYLT2	ENSG00000172986.12	protein_coding	25.5	34.78	1.36392
RP3-403A15.5	ENSG00000255330.9	protein_coding	7.64	10.42	1.36387
COL4A3BP	ENSG00000113163.15	protein_coding	22.74	31.01	1.36368
C11orf31	ENSG00000211450.9	protein_coding	170.13	231.96	1.36343
ARHGAP22	ENSG00000128805.14	protein_coding	13.55	18.47	1.3631
ZNF395	ENSG00000186918.13	protein_coding	165.13	225.07	1.36299
RAD52	ENSG00000002016.17	protein_coding	7.77	10.59	1.36293
PTPRM	ENSG00000173482.16	protein_coding	57.11	77.83	1.36281
ZNF768	ENSG00000169957.9	protein_coding	24.81	33.81	1.36276
SERPINH1	ENSG00000149257.13	protein_coding	93.79	127.8	1.36262
GEMIN8	ENSG00000046647.13	protein_coding	27.25	37.13	1.36257
VARS2	ENSG00000137411.16	protein_coding	14.95	20.37	1.36254
HOXD11	ENSG00000128713.12	protein_coding	9.39	12.79	1.36209
RPL5	ENSG00000122406.12	protein_coding	1293.22	1761.43	1.36205
FAM206A	ENSG00000119328.11	protein_coding	23.26	31.68	1.36199
RPL30	ENSG00000156482.10	protein_coding	3251.37	4428.3	1.36198
UNC45A	ENSG00000140553.16	protein_coding	57.04	77.68	1.36185
GGA1	ENSG00000100083.18	protein_coding	40.55	55.22	1.36178
TJAP1	ENSG00000137221.14	protein_coding	13.11	17.85	1.36156
RFXANK	ENSG00000064490.13	protein_coding	53.69	73.1	1.36152
GET4	ENSG00000239857.6	protein_coding	31.06	42.28	1.36124
TMEM140	ENSG00000146859.6	protein_coding	22.73	30.93	1.36076
PAXBP1	ENSG00000159086.14	protein_coding	17.83	24.26	1.36063
RBAK	ENSG00000146587.17	protein_coding	10.4	14.15	1.36058
RPL15	ENSG00000174748.18	protein_coding	1523.72	2072.9	1.36042
BACH1	ENSG00000156273.15	protein_coding	25.36	34.5	1.36041
CNTROB	ENSG00000170037.13	protein_coding	26.67	36.28	1.36033
SUMF1	ENSG00000144455.13	protein_coding	21.81	29.66	1.35993
ZNF85	ENSG00000105750.14	protein_coding	9.42	12.81	1.35987
MIB2	ENSG00000197530.12	protein_coding	37.53	51.03	1.35971
SERGEF	ENSG00000129158.10	protein_coding	19.58	26.62	1.35955
FAM98A	ENSG00000119812.18	protein_coding	78.91	107.21	1.35864
ARAP1	ENSG00000186635.14	protein_coding	45.21	61.41	1.35833
TMEM55A	ENSG00000155099.7	protein_coding	15.48	21.02	1.35788
NOP14	ENSG00000087269.15	protein_coding	15.62	21.21	1.35787
DNAJC1	ENSG00000136770.10	protein_coding	43.15	58.59	1.35782
CTSB	ENSG00000164733.20	protein_coding	312.8	424.67	1.35764
MED15	ENSG00000099917.17	protein_coding	60.85	82.61	1.3576
LIAS	ENSG00000121897.13	protein_coding	21.37	29.01	1.35751
P4HTM	ENSG00000178467.17	protein_coding	41.54	56.38	1.35725
CWF19L2	ENSG00000152404.15	protein_coding	9.94	13.49	1.35714
ARIH1	ENSG00000166233.13	protein_coding	36.12	49.01	1.35687
ZNF525	ENSG00000203326.10	protein_coding	5.61	7.61	1.35651
TP53INP1	ENSG00000164938.13	protein_coding	8.98	12.18	1.35635
FMN1	ENSG00000248905.8	protein_coding	6.09	8.26	1.35632
CSDE1	ENSG00000009307.15	protein_coding	306.78	416.07	1.35625
ZNF808	ENSG00000198482.10	protein_coding	5.65	7.66	1.35575
C1orf131	ENSG00000143633.12	protein_coding	13.72	18.6	1.35569
JMJD1C	ENSG00000171988.17	protein_coding	36.32	49.22	1.35518
CCNI	ENSG00000118816.9	protein_coding	245.04	331.99	1.35484
FBXL12	ENSG00000127452.8	protein_coding	24.24	32.84	1.35479
NAT6	ENSG00000243477.5	protein_coding	12.29	16.65	1.35476
LAMB1	ENSG00000091136.13	protein_coding	261.92	354.82	1.35469
RPS6	ENSG00000137154.12	protein_coding	2083.52	2822.03	1.35445
RPL6	ENSG00000089009.15	protein_coding	1592.77	2156.89	1.35418
PELI1	ENSG00000197329.11	protein_coding	12.13	16.42	1.35367
TNS3	ENSG00000136205.16	protein_coding	33.23	44.98	1.3536
GCC2	ENSG00000135968.20	protein_coding	37.15	50.28	1.35343
SLC30A1	ENSG00000170385.9	protein_coding	7.71	10.43	1.35279
PLSCR1	ENSG00000188313.12	protein_coding	42.72	57.79	1.35276
IER2	ENSG00000160888.6	protein_coding	50.14	67.82	1.35261
RIT1	ENSG00000143622.10	protein_coding	32.19	43.54	1.35259
FAM200A	ENSG00000221909.2	protein_coding	5.65	7.64	1.35221
SPATA6	ENSG00000132122.11	protein_coding	6.25	8.45	1.352
CPEB1	ENSG00000214575.9	protein_coding	10.43	14.1	1.35187
PAAF1	ENSG00000175575.12	protein_coding	26.89	36.34	1.35143
ARL5B	ENSG00000165997.4	protein_coding	16.31	22.04	1.35132
FNTB	ENSG00000257365.7	protein_coding	9.46	12.78	1.35095
DNAJC4	ENSG00000110011.13	protein_coding	53.09	71.72	1.35091
C12orf66	ENSG00000174206.12	protein_coding	7.45	10.06	1.35034
CRBN	ENSG00000113851.13	protein_coding	13.99	18.89	1.35025
C22orf29	ENSG00000215012.8	protein_coding	8.29	11.19	1.34982
ZSCAN18	ENSG00000121413.12	protein_coding	25.08	33.85	1.34968
ARFGAP1	ENSG00000101199.12	protein_coding	217.67	293.78	1.34966
USP24	ENSG00000162402.13	protein_coding	13.28	17.92	1.3494
BIN1	ENSG00000136717.14	protein_coding	65.63	88.56	1.34938
ZNF33B	ENSG00000196693.14	protein_coding	10.25	13.83	1.34927
COX19	ENSG00000240230.5	protein_coding	5.73	7.73	1.34904
HTRA1	ENSG00000166033.11	protein_coding	70.46	95.05	1.34899
OPTN	ENSG00000123240.16	protein_coding	137	184.81	1.34898
RACK1	ENSG00000204628.11	protein_coding	2812.08	3793.43	1.34898
SNAI2	ENSG00000019549.8	protein_coding	14.38	19.39	1.3484
CTSL	ENSG00000135047.14	protein_coding	227.08	306.1	1.34798
TMLHE	ENSG00000185973.10	protein_coding	16.99	22.9	1.34785
ENDOD1	ENSG00000149218.4	protein_coding	15.11	20.36	1.34745
E2F5	ENSG00000133740.10	protein_coding	18.91	25.48	1.34744
GTF2IRD2	ENSG00000196275.13	protein_coding	17.45	23.51	1.34728
DIP2A	ENSG00000160305.17	protein_coding	32.65	43.98	1.34701
SUMF2	ENSG00000129103.17	protein_coding	130.9	176.31	1.34691
TAF1C	ENSG00000103168.16	protein_coding	21.65	29.16	1.34688
NFYC	ENSG00000066136.20	protein_coding	27.31	36.77	1.34639
ATG16L2	ENSG00000168010.10	protein_coding	29.91	40.27	1.34637
RPL34	ENSG00000109475.16	protein_coding	2116.69	2849.69	1.3463
ENPEP	ENSG00000138792.9	protein_coding	50.98	68.62	1.34602
CYB5R1	ENSG00000159348.12	protein_coding	27.35	36.8	1.34552
STK35	ENSG00000125834.12	protein_coding	8.02	10.79	1.34539
RAPGEF3	ENSG00000079337.15	protein_coding	9.01	12.12	1.34517
SYVN1	ENSG00000162298.17	protein_coding	21.74	29.23	1.34453
RPL38	ENSG00000172809.12	protein_coding	1677.64	2255.29	1.34432
SLC35E1	ENSG00000127526.14	protein_coding	28.1	37.76	1.34377
ZBTB22	ENSG00000236104.2	protein_coding	6.44	8.65	1.34317
NHLRC2	ENSG00000196865.4	protein_coding	8.83	11.86	1.34315
RPL23	ENSG00000125691.12	protein_coding	1851.63	2486.63	1.34294
DCP1B	ENSG00000151065.13	protein_coding	13.69	18.38	1.34259
CASC3	ENSG00000108349.15	protein_coding	32.92	44.19	1.34235
DCTN4	ENSG00000132912.12	protein_coding	35.52	47.68	1.34234
CALML4	ENSG00000129007.14	protein_coding	6.49	8.71	1.34206
FAM102B	ENSG00000162636.15	protein_coding	5.41	7.26	1.34196
ZFPL1	ENSG00000162300.11	protein_coding	64.51	86.56	1.34181
NFKB2	ENSG00000077150.18	protein_coding	67.48	90.54	1.34173
PKN1	ENSG00000123143.12	protein_coding	153.15	205.45	1.3415
KIAA1522	ENSG00000162522.10	protein_coding	38.81	52.06	1.34141
SMG6	ENSG00000070366.13	protein_coding	18.19	24.4	1.3414
RPL10A	ENSG00000198755.10	protein_coding	1212.35	1626	1.3412
ZNF710	ENSG00000140548.9	protein_coding	8.3	11.13	1.34096
TRIP10	ENSG00000125733.17	protein_coding	116.79	156.6	1.34087
ZFAND1	ENSG00000104231.10	protein_coding	140.32	188.15	1.34086
ZKSCAN1	ENSG00000106261.16	protein_coding	40.85	54.76	1.34051
NPIPA8	ENSG00000214940.8	protein_coding	25.18	33.75	1.34035
RPL36A	ENSG00000241343.9	protein_coding	3306.66	4432.01	1.34033
TRAPPC6B	ENSG00000182400.14	protein_coding	11.76	15.76	1.34014
BBS4	ENSG00000140463.13	protein_coding	18.75	25.1	1.33867
IL15	ENSG00000164136.16	protein_coding	16.89	22.61	1.33866
DNAJC12	ENSG00000108176.14	protein_coding	7.68	10.28	1.33854
PPIL3	ENSG00000240344.8	protein_coding	54.8	73.35	1.3385
EPOR	ENSG00000187266.13	protein_coding	11.76	15.74	1.33844
TMEM173	ENSG00000184584.12	protein_coding	44.31	59.3	1.3383
NT5DC3	ENSG00000111696.11	protein_coding	7.7	10.3	1.33766
PPARD	ENSG00000112033.13	protein_coding	16.18	21.64	1.33745
NKTR	ENSG00000114857.17	protein_coding	33.77	45.15	1.33699
RIN2	ENSG00000132669.12	protein_coding	22.43	29.98	1.3366
TXLNG	ENSG00000086712.12	protein_coding	9.93	13.27	1.33635
TRMT10B	ENSG00000165275.9	protein_coding	6.16	8.23	1.33604
PCBP2	ENSG00000197111.15	protein_coding	726.55	970.6	1.3359
ZMAT3	ENSG00000172667.10	protein_coding	31.44	41.98	1.33524
ZNF865	ENSG00000261221.3	protein_coding	5.89	7.86	1.33447
KIAA1147	ENSG00000257093.6	protein_coding	16.86	22.49	1.33393
TTLL7	ENSG00000137941.16	protein_coding	9.83	13.11	1.33367
BPHL	ENSG00000137274.12	protein_coding	10.97	14.63	1.33364
PHF21A	ENSG00000135365.15	protein_coding	18.06	24.08	1.33333
IFT140	ENSG00000187535.13	protein_coding	14.22	18.96	1.33333
TMEM167B	ENSG00000215717.5	protein_coding	56.24	74.98	1.33321
LRPPRC	ENSG00000138095.18	protein_coding	46.62	62.15	1.33312
NUMA1	ENSG00000137497.17	protein_coding	70.5	93.98	1.33305
OBFC1	ENSG00000107960.10	protein_coding	31.35	41.79	1.33301
PHLDA3	ENSG00000174307.6	protein_coding	96.35	128.43	1.33295
ZNF182	ENSG00000147118.11	protein_coding	5.62	7.49	1.33274
DNASE2	ENSG00000105612.8	protein_coding	51.02	67.99	1.33261
RDH13	ENSG00000160439.15	protein_coding	6.83	9.1	1.33236
SHARPIN	ENSG00000179526.16	protein_coding	73.29	97.63	1.33211
CLSTN3	ENSG00000139182.13	protein_coding	10.25	13.65	1.33171
ATPAF2	ENSG00000171953.15	protein_coding	14.08	18.75	1.33168
RBSN	ENSG00000131381.12	protein_coding	9.95	13.25	1.33166
NID2	ENSG00000087303.17	protein_coding	15.92	21.2	1.33166
MYLIP	ENSG00000007944.14	protein_coding	12.98	17.28	1.33128
MED10	ENSG00000133398.3	protein_coding	105.58	140.53	1.33103
CCDC106	ENSG00000173581.7	protein_coding	8.58	11.42	1.331
ARHGEF10	ENSG00000104728.15	protein_coding	17.8	23.69	1.3309
MAX	ENSG00000125952.18	protein_coding	17.08	22.73	1.3308
MFAP3	ENSG00000037749.11	protein_coding	14.82	19.72	1.33063
DARS	ENSG00000115866.10	protein_coding	91.73	122.02	1.33021
HILPDA	ENSG00000135245.9	protein_coding	80.45	107	1.33002
GEMIN6	ENSG00000152147.10	protein_coding	8.1	10.77	1.32963
ZNF761	ENSG00000160336.14	protein_coding	9.56	12.71	1.3295
CIR1	ENSG00000138433.15	protein_coding	46.64	62	1.32933
HES1	ENSG00000114315.3	protein_coding	10.66	14.17	1.32927
EPB41L1	ENSG00000088367.21	protein_coding	17.08	22.7	1.32904
KDM4C	ENSG00000107077.17	protein_coding	9.3	12.36	1.32903
PMEPA1	ENSG00000124225.15	protein_coding	39.57	52.58	1.32878
DPP4	ENSG00000197635.9	protein_coding	144.9	192.54	1.32878
DEAF1	ENSG00000177030.16	protein_coding	25.37	33.71	1.32873
DGCR6	ENSG00000183628.12	protein_coding	14.61	19.41	1.32854
THAP6	ENSG00000174796.12	protein_coding	8.44	11.21	1.3282
TPD52L1	ENSG00000111907.20	protein_coding	102.4	135.98	1.32793
FAM92A1	ENSG00000188343.12	protein_coding	16.88	22.41	1.32761
SRSF6	ENSG00000124193.14	protein_coding	62.39	82.82	1.32746
FAM109A	ENSG00000198324.13	protein_coding	6.2	8.23	1.32742
WSB1	ENSG00000109046.14	protein_coding	93.51	124.12	1.32734
ANKRA2	ENSG00000164331.9	protein_coding	13.84	18.37	1.32731
XPA	ENSG00000136936.10	protein_coding	11.15	14.79	1.32646
ST3GAL5	ENSG00000115525.16	protein_coding	25.06	33.24	1.32642
RIOK3	ENSG00000101782.14	protein_coding	30.87	40.94	1.32621
SP100	ENSG00000067066.16	protein_coding	63.74	84.53	1.32617
RNF40	ENSG00000103549.21	protein_coding	35.17	46.64	1.32613
FNIP1	ENSG00000217128.11	protein_coding	16.17	21.44	1.32591
ZNF3	ENSG00000166526.16	protein_coding	26.25	34.8	1.32571
RNF38	ENSG00000137075.17	protein_coding	13.05	17.3	1.32567
MAP7D2	ENSG00000184368.15	protein_coding	103.65	137.37	1.32533
MAU2	ENSG00000129933.20	protein_coding	14.94	19.8	1.3253
MTO1	ENSG00000135297.15	protein_coding	11.44	15.16	1.32517
APEX1	ENSG00000100823.11	protein_coding	80.12	106.14	1.32476
ITPRIPL2	ENSG00000205730.6	protein_coding	10.38	13.75	1.32466
SMARCD3	ENSG00000082014.16	protein_coding	34.07	45.11	1.32404
SOD2	ENSG00000112096.16	protein_coding	362.62	479.99	1.32367
KLHL23	ENSG00000213160.9	protein_coding	10.29	13.61	1.32264
RP11-5A19.5	ENSG00000265690.7	protein_coding	7.26	9.6	1.32231
SP1	ENSG00000185591.9	protein_coding	33.33	44.06	1.32193
TRIM47	ENSG00000132481.6	protein_coding	17.43	23.03	1.32129
ZNF827	ENSG00000151612.15	protein_coding	6.79	8.97	1.32106
FUT11	ENSG00000196968.10	protein_coding	38.02	50.22	1.32088
EGFLAM	ENSG00000164318.17	protein_coding	19.18	25.32	1.32013
MLST8	ENSG00000167965.17	protein_coding	28.34	37.41	1.32004
DHX34	ENSG00000134815.18	protein_coding	6.47	8.54	1.31994
SLC23A2	ENSG00000089057.14	protein_coding	6.11	8.06	1.31915
CXXC1	ENSG00000154832.14	protein_coding	26.12	34.45	1.31891
LIFR	ENSG00000113594.9	protein_coding	7.34	9.68	1.3188
WASF2	ENSG00000158195.10	protein_coding	116.97	154.14	1.31777
CUX1	ENSG00000257923.9	protein_coding	91.95	121.16	1.31767
AGER	ENSG00000204305.13	protein_coding	5.86	7.72	1.31741
ARNT	ENSG00000143437.20	protein_coding	23.13	30.47	1.31734
PDZK1	ENSG00000174827.13	protein_coding	143.18	188.61	1.31729
TBL2	ENSG00000106638.15	protein_coding	88.26	116.26	1.31724
RSF1	ENSG00000048649.13	protein_coding	31.31	41.24	1.31715
DYNC2H1	ENSG00000187240.13	protein_coding	6.94	9.14	1.317
DDX49	ENSG00000105671.11	protein_coding	23.91	31.48	1.3166
SUPT5H	ENSG00000196235.13	protein_coding	64.48	84.89	1.31653
CRAMP1	ENSG00000007545.15	protein_coding	5.88	7.74	1.31633
NPHP3	ENSG00000113971.18	protein_coding	16.43	21.62	1.31589
CENPT	ENSG00000102901.12	protein_coding	26.29	34.59	1.31571
SPACA9	ENSG00000165698.15	protein_coding	13.4	17.63	1.31567
USP21	ENSG00000143258.15	protein_coding	13.87	18.24	1.31507
HMGCL	ENSG00000117305.14	protein_coding	67.96	89.37	1.31504
FTH1	ENSG00000167996.15	protein_coding	5364.46	7051.94	1.31457
UBR3	ENSG00000144357.16	protein_coding	11.13	14.63	1.31447
PDGFA	ENSG00000197461.13	protein_coding	16.27	21.38	1.31407
ABI2	ENSG00000138443.15	protein_coding	26.27	34.52	1.31405
FAM134A	ENSG00000144567.10	protein_coding	71.32	93.71	1.31394
ACBD4	ENSG00000181513.14	protein_coding	13.03	17.12	1.31389
ESYT2	ENSG00000117868.15	protein_coding	95.89	125.91	1.31307
CRYL1	ENSG00000165475.13	protein_coding	54.04	70.93	1.31255
HOXA5	ENSG00000106004.4	protein_coding	15.65	20.54	1.31246
SNX21	ENSG00000124104.18	protein_coding	13.89	18.23	1.31246
LUC7L	ENSG00000007392.16	protein_coding	16.78	22.02	1.31228
EVI2A	ENSG00000126860.11	protein_coding	7.82	10.26	1.31202
OXSM	ENSG00000151093.7	protein_coding	14.17	18.59	1.31193
HOXA4	ENSG00000197576.13	protein_coding	30.81	40.41	1.31159
ZBTB10	ENSG00000205189.11	protein_coding	12.75	16.72	1.31137
GGT7	ENSG00000131067.16	protein_coding	17.86	23.42	1.31131
STBD1	ENSG00000118804.8	protein_coding	14.21	18.63	1.31105
RPS4Y1	ENSG00000129824.15	protein_coding	496.32	650.59	1.31083
ATHL1	ENSG00000142102.15	protein_coding	20.7	27.13	1.31063
TPCN1	ENSG00000186815.12	protein_coding	68.05	89.17	1.31036
PLEKHA5	ENSG00000052126.14	protein_coding	34.68	45.44	1.31027
LIN7C	ENSG00000148943.11	protein_coding	9.38	12.29	1.31023
CD24	ENSG00000272398.5	protein_coding	1492.65	1955.09	1.30981
DAGLB	ENSG00000164535.14	protein_coding	13.09	17.14	1.3094
GTPBP3	ENSG00000130299.16	protein_coding	26.03	34.08	1.30926
RPL3	ENSG00000100316.15	protein_coding	2425.29	3174.65	1.30898
SIK2	ENSG00000170145.4	protein_coding	6.15	8.05	1.30894
SF3A2	ENSG00000104897.9	protein_coding	74.68	97.71	1.30838
GCNT3	ENSG00000140297.12	protein_coding	16.15	21.13	1.30836
BTBD2	ENSG00000133243.8	protein_coding	90.36	118.17	1.30777
NDUFV3	ENSG00000160194.17	protein_coding	11.64	15.22	1.30756
ZBTB26	ENSG00000171448.8	protein_coding	5.4	7.06	1.30741
BOD1	ENSG00000145919.10	protein_coding	59.93	78.35	1.30736
UBL3	ENSG00000122042.9	protein_coding	9.99	13.06	1.30731
PAPD4	ENSG00000164329.13	protein_coding	19.37	25.32	1.30718
NCKIPSD	ENSG00000213672.7	protein_coding	13.92	18.19	1.30675
HOXB7	ENSG00000260027.4	protein_coding	13.41	17.52	1.30649
REPIN1	ENSG00000214022.11	protein_coding	162.48	212.27	1.30644
DNAL1	ENSG00000119661.14	protein_coding	6.89	9	1.30624
FOXO4	ENSG00000184481.16	protein_coding	5.39	7.04	1.30612
ZFAND5	ENSG00000107372.12	protein_coding	162.47	212.19	1.30603
HNMT	ENSG00000150540.13	protein_coding	6.31	8.24	1.30586
THEM4	ENSG00000159445.12	protein_coding	5.56	7.26	1.30576
UBR2	ENSG00000024048.10	protein_coding	7.2	9.4	1.30556
CMIP	ENSG00000153815.16	protein_coding	146.18	190.82	1.30538
MADD	ENSG00000110514.19	protein_coding	8.98	11.72	1.30512
MRTO4	ENSG00000053372.4	protein_coding	32.22	42.03	1.30447
TMEM5	ENSG00000118600.11	protein_coding	17.31	22.58	1.30445
DDX55	ENSG00000111364.15	protein_coding	11.87	15.48	1.30413
UHMK1	ENSG00000152332.15	protein_coding	37.66	49.11	1.30404
SKAP1	ENSG00000141293.15	protein_coding	35.96	46.86	1.30311
MRPS18B	ENSG00000204568.11	protein_coding	48.5	63.19	1.30289
CTSO	ENSG00000256043.2	protein_coding	5.56	7.24	1.30216
PLEKHM3	ENSG00000178385.14	protein_coding	5.74	7.47	1.30139
SLU7	ENSG00000164609.9	protein_coding	31.93	41.55	1.30128
PARP16	ENSG00000138617.14	protein_coding	13.86	18.03	1.30087
PCGF3	ENSG00000185619.18	protein_coding	23.5	30.57	1.30085
FOXP2	ENSG00000128573.23	protein_coding	7.78	10.12	1.30077
RPL11	ENSG00000142676.12	protein_coding	2799.59	3641	1.30055
TRIQK	ENSG00000205133.11	protein_coding	83.25	108.26	1.30042
PEX1	ENSG00000127980.15	protein_coding	14.99	19.49	1.3002
TRIM65	ENSG00000141569.10	protein_coding	12.57	16.34	1.29992
FO538757.1	ENSG00000279457.3	protein_coding	8.24	10.71	1.29976
PKD1	ENSG00000008710.18	protein_coding	55.42	72.02	1.29953
AP2A2	ENSG00000183020.13	protein_coding	29.94	38.9	1.29927
CYP2R1	ENSG00000186104.10	protein_coding	9.28	12.05	1.29849
ILVBL	ENSG00000105135.15	protein_coding	74.39	96.57	1.29816
C11orf1	ENSG00000137720.7	protein_coding	27.34	35.49	1.2981
MT-ND4L	ENSG00000212907.2	protein_coding	9576.95	12431.7	1.29808
HS1BP3	ENSG00000118960.12	protein_coding	26.15	33.94	1.2979
SLC16A7	ENSG00000118596.11	protein_coding	9.67	12.55	1.29783
DMTF1	ENSG00000135164.18	protein_coding	42.11	54.65	1.29779
RBPJ	ENSG00000168214.20	protein_coding	36.98	47.99	1.29773
NEK7	ENSG00000151414.14	protein_coding	19.39	25.16	1.29758
RPL32	ENSG00000144713.12	protein_coding	939.41	1218.9	1.29752
DNAJC16	ENSG00000116138.12	protein_coding	7.16	9.29	1.29749
IGSF8	ENSG00000162729.13	protein_coding	53.28	69.13	1.29748
SNX8	ENSG00000106266.9	protein_coding	31.99	41.49	1.29697
COX7A2L	ENSG00000115944.14	protein_coding	151.78	196.82	1.29675
DUSP28	ENSG00000188542.9	protein_coding	5.53	7.17	1.29656
SETD4	ENSG00000185917.13	protein_coding	19.56	25.36	1.29652
RPL37A	ENSG00000197756.9	protein_coding	3673.31	4760.79	1.29605
TM4SF19	ENSG00000145107.15	protein_coding	5.27	6.83	1.29602
GTPBP2	ENSG00000172432.18	protein_coding	55.72	72.21	1.29594
CES2	ENSG00000172831.11	protein_coding	38.01	49.25	1.29571
ZNF76	ENSG00000065029.14	protein_coding	12.01	15.56	1.29559
LRRC58	ENSG00000163428.3	protein_coding	18.31	23.72	1.29547
ADCK4	ENSG00000123815.11	protein_coding	23.57	30.53	1.29529
CTAGE4	ENSG00000225932.3	protein_coding	8.04	10.41	1.29478
LY6G5B	ENSG00000240053.8	protein_coding	5.5	7.12	1.29455
CRTC2	ENSG00000160741.16	protein_coding	23.64	30.6	1.29442
TMEM44	ENSG00000145014.17	protein_coding	51.6	66.79	1.29438
ASH1L	ENSG00000116539.11	protein_coding	13.16	17.03	1.29407
2018-03-06	ENSG00000145495.14	protein_coding	134.57	174.13	1.29397
PPT2	ENSG00000221988.12	protein_coding	7.79	10.08	1.29397
EEF1D	ENSG00000104529.17	protein_coding	694.2	898.22	1.29389
BRI3	ENSG00000164713.9	protein_coding	315.97	408.76	1.29367
RPL29	ENSG00000162244.10	protein_coding	1711.98	2214.29	1.29341
RPL23A	ENSG00000198242.13	protein_coding	899.01	1162.67	1.29328
GNL3	ENSG00000163938.16	protein_coding	112.66	145.7	1.29327
STAT5B	ENSG00000173757.9	protein_coding	12.89	16.67	1.29325
TMEM205	ENSG00000105518.13	protein_coding	146.43	189.31	1.29284
ARMCX6	ENSG00000198960.10	protein_coding	46.66	60.32	1.29276
TMF1	ENSG00000144747.15	protein_coding	28.08	36.3	1.29274
CPNE3	ENSG00000085719.12	protein_coding	82.53	106.68	1.29262
POFUT2	ENSG00000186866.16	protein_coding	126.65	163.7	1.29254
ZZZ3	ENSG00000036549.12	protein_coding	39.46	51	1.29245
RAP2B	ENSG00000181467.4	protein_coding	8.96	11.58	1.29241
RNF44	ENSG00000146083.11	protein_coding	23.44	30.29	1.29224
MRPL53	ENSG00000204822.6	protein_coding	41.51	53.62	1.29174
HOXD9	ENSG00000128709.12	protein_coding	8.95	11.56	1.29162
RASSF7	ENSG00000099849.14	protein_coding	61.83	79.85	1.29144
DCAF16	ENSG00000163257.10	protein_coding	18.15	23.43	1.29091
CCDC97	ENSG00000142039.3	protein_coding	7.19	9.28	1.29068
TMEM38B	ENSG00000095209.11	protein_coding	13.82	17.83	1.29016
MT-ND4	ENSG00000198886.2	protein_coding	4913.7	6338.81	1.29003
KDM4B	ENSG00000127663.14	protein_coding	15	19.35	1.29
RPLP0	ENSG00000089157.15	protein_coding	3102.72	4000.73	1.28943
RPS13	ENSG00000110700.6	protein_coding	924.03	1191.27	1.28921
LASP1	ENSG00000002834.17	protein_coding	90.35	116.47	1.2891
CACNB3	ENSG00000167535.7	protein_coding	26.95	34.74	1.28905
BAIAP2L1	ENSG00000006453.13	protein_coding	65.94	84.99	1.2889
ZNF322	ENSG00000181315.10	protein_coding	9.14	11.78	1.28884
NFIL3	ENSG00000165030.3	protein_coding	97.17	125.23	1.28877
FAM160A2	ENSG00000051009.10	protein_coding	13.77	17.74	1.28831
HSDL1	ENSG00000103160.11	protein_coding	12.36	15.92	1.28803
TMEM143	ENSG00000161558.10	protein_coding	7.68	9.89	1.28776
HERPUD1	ENSG00000051108.14	protein_coding	127.53	164.19	1.28746
HOXB2	ENSG00000173917.10	protein_coding	24.31	31.29	1.28712
BBS1	ENSG00000174483.19	protein_coding	16.1	20.72	1.28696
L2HGDH	ENSG00000087299.11	protein_coding	5.96	7.67	1.28691
FGFR1OP	ENSG00000213066.11	protein_coding	20.75	26.7	1.28675
WDR36	ENSG00000134987.11	protein_coding	13.16	16.93	1.28647
SLC7A6OS	ENSG00000103061.12	protein_coding	12.4	15.95	1.28629
BCORL1	ENSG00000085185.15	protein_coding	7.38	9.49	1.28591
TOR1B	ENSG00000136816.15	protein_coding	22.56	29.01	1.2859
ZNF292	ENSG00000188994.12	protein_coding	7.18	9.23	1.28552
TMEM222	ENSG00000186501.14	protein_coding	33.42	42.96	1.28546
FGD6	ENSG00000180263.13	protein_coding	6.8	8.74	1.28529
MDN1	ENSG00000112159.11	protein_coding	7.26	9.33	1.28512
LITAF	ENSG00000189067.12	protein_coding	249.49	320.61	1.28506
RPS4X	ENSG00000198034.10	protein_coding	1050.56	1349.92	1.28495
YY1AP1	ENSG00000163374.19	protein_coding	41.38	53.17	1.28492
SEC24B	ENSG00000138802.11	protein_coding	19.2	24.66	1.28438
FAM21A	ENSG00000099290.15	protein_coding	18.89	24.26	1.28428
SNTB2	ENSG00000168807.16	protein_coding	9.85	12.65	1.28426
ANKRD18A	ENSG00000180071.19	protein_coding	7.32	9.4	1.28415
TBC1D15	ENSG00000121749.15	protein_coding	29.78	38.23	1.28375
PFDN5	ENSG00000123349.13	protein_coding	484.34	621.77	1.28375
CAB39L	ENSG00000102547.18	protein_coding	7.12	9.14	1.28371
AS3MT	ENSG00000214435.7	protein_coding	6.77	8.69	1.2836
DNAJC2	ENSG00000105821.14	protein_coding	35.83	45.98	1.28328
ZNF143	ENSG00000166478.9	protein_coding	12.25	15.72	1.28327
MAP7	ENSG00000135525.18	protein_coding	10.33	13.25	1.28267
FRA10AC1	ENSG00000148690.11	protein_coding	15.46	19.83	1.28266
IFT172	ENSG00000138002.14	protein_coding	22.05	28.28	1.28254
NRAS	ENSG00000213281.4	protein_coding	41.91	53.75	1.28251
DBNDD2	ENSG00000244274.7	protein_coding	14.84	19.03	1.28235
RASSF4	ENSG00000107551.20	protein_coding	59.21	75.91	1.28205
CEP350	ENSG00000135837.15	protein_coding	11.92	15.28	1.28188
RNF113A	ENSG00000125352.5	protein_coding	13.36	17.12	1.28144
HIPK2	ENSG00000064393.15	protein_coding	51.49	65.98	1.28141
ZNF770	ENSG00000198146.4	protein_coding	13.62	17.45	1.2812
RP11-195F19.5	ENSG00000187186.14	protein_coding	12.03	15.41	1.28096
RPS20	ENSG00000008988.9	protein_coding	3392.98	4345.55	1.28075
MORC3	ENSG00000159256.12	protein_coding	15.4	19.72	1.28052
DMTN	ENSG00000158856.17	protein_coding	33.67	43.09	1.27977
FLYWCH1	ENSG00000059122.16	protein_coding	44.56	57.01	1.2794
GPATCH2L	ENSG00000089916.17	protein_coding	11.93	15.26	1.27913
PCED1A	ENSG00000132635.16	protein_coding	20.71	26.49	1.27909
METAP1D	ENSG00000172878.13	protein_coding	5.02	6.42	1.27888
ARHGAP32	ENSG00000134909.18	protein_coding	5.06	6.47	1.27866
ZNF621	ENSG00000172888.11	protein_coding	10.77	13.77	1.27855
NFU1	ENSG00000169599.12	protein_coding	30.34	38.79	1.27851
LCAT	ENSG00000213398.7	protein_coding	20.47	26.17	1.27846
AMBRA1	ENSG00000110497.14	protein_coding	7.08	9.05	1.27825
TTC38	ENSG00000075234.16	protein_coding	13.16	16.82	1.27812
AIMP1	ENSG00000164022.16	protein_coding	44.06	56.31	1.27803
TSC22D2	ENSG00000196428.12	protein_coding	45.97	58.75	1.27801
RPS25	ENSG00000118181.10	protein_coding	991.72	1267.38	1.27796
TAP1	ENSG00000168394.10	protein_coding	53.04	67.78	1.2779
DDX17	ENSG00000100201.19	protein_coding	172.62	220.57	1.27778
TGIF2	ENSG00000118707.9	protein_coding	8.5	10.86	1.27765
CUL4B	ENSG00000158290.16	protein_coding	36.99	47.26	1.27764
SOX12	ENSG00000177732.8	protein_coding	9.37	11.97	1.27748
PPP1R18	ENSG00000146112.11	protein_coding	70.68	90.29	1.27745
KMT5B	ENSG00000110066.14	protein_coding	13.2	16.86	1.27727
NUP62CL	ENSG00000198088.10	protein_coding	8.48	10.83	1.27712
POLR1C	ENSG00000171453.17	protein_coding	22.98	29.34	1.27676
IMP3	ENSG00000177971.8	protein_coding	18.33	23.4	1.2766
RPS18	ENSG00000231500.6	protein_coding	3829.65	4887.54	1.27624
GSAP	ENSG00000186088.15	protein_coding	14.88	18.99	1.27621
SIKE1	ENSG00000052723.11	protein_coding	57.18	72.96	1.27597
PLEKHA7	ENSG00000166689.15	protein_coding	5.11	6.52	1.27593
ZDHHC4	ENSG00000136247.14	protein_coding	17.22	21.96	1.27526
SFXN3	ENSG00000107819.13	protein_coding	70.94	90.41	1.27446
DNAJB12	ENSG00000148719.14	protein_coding	90.62	115.48	1.27433
SMG7	ENSG00000116698.20	protein_coding	25.71	32.76	1.27421
PRPF38B	ENSG00000134186.11	protein_coding	23.64	30.11	1.27369
DPF2	ENSG00000133884.9	protein_coding	26.53	33.79	1.27365
ABL2	ENSG00000143322.19	protein_coding	14.16	18.03	1.27331
KANSL3	ENSG00000114982.17	protein_coding	36.98	47.08	1.27312
ZCCHC11	ENSG00000134744.13	protein_coding	35.91	45.71	1.2729
ZFP36L1	ENSG00000185650.9	protein_coding	278.9	354.99	1.27282
AMZ1	ENSG00000174945.13	protein_coding	31.6	40.22	1.27278
PGAP1	ENSG00000197121.14	protein_coding	5.06	6.44	1.27273
RPL13A	ENSG00000142541.16	protein_coding	1997.3	2541.71	1.27257
SLC44A3	ENSG00000143036.16	protein_coding	19.63	24.98	1.27254
RIMKLB	ENSG00000166532.15	protein_coding	14.69	18.69	1.27229
EFCAB7	ENSG00000203965.12	protein_coding	7.24	9.21	1.2721
UTY	ENSG00000183878.15	protein_coding	11.81	15.02	1.2718
WDR55	ENSG00000120314.18	protein_coding	29.36	37.34	1.2718
HLA-C	ENSG00000204525.15	protein_coding	321.18	408.47	1.27178
ARRDC3	ENSG00000113369.8	protein_coding	112.79	143.44	1.27174
RPS15A	ENSG00000134419.15	protein_coding	2216.66	2817.98	1.27127
RCOR1	ENSG00000089902.9	protein_coding	10.03	12.75	1.27119
RSPRY1	ENSG00000159579.13	protein_coding	28.32	36	1.27119
SDCBP	ENSG00000137575.11	protein_coding	209.69	266.54	1.27111
STX7	ENSG00000079950.13	protein_coding	36.28	46.11	1.27095
RPS3A	ENSG00000145425.9	protein_coding	1560.9	1983.16	1.27052
ANAPC2	ENSG00000176248.8	protein_coding	31.75	40.33	1.27024
C6orf1	ENSG00000186577.12	protein_coding	9.72	12.34	1.26955
MNT	ENSG00000070444.14	protein_coding	15.26	19.37	1.26933
RPS23	ENSG00000186468.12	protein_coding	1690.88	2145.82	1.26906
GID4	ENSG00000141034.9	protein_coding	8.12	10.3	1.26847
CLUH	ENSG00000132361.16	protein_coding	25.28	32.06	1.2682
KDM5A	ENSG00000073614.12	protein_coding	10.59	13.43	1.26818
SLC15A4	ENSG00000139370.10	protein_coding	58.15	73.66	1.26672
IRF3	ENSG00000126456.15	protein_coding	43.89	55.59	1.26658
VSTM4	ENSG00000165633.12	protein_coding	6.38	8.08	1.26646
HEBP1	ENSG00000013583.8	protein_coding	89.9	113.85	1.26641
REV1	ENSG00000135945.9	protein_coding	15.14	19.17	1.26618
ZBTB4	ENSG00000174282.11	protein_coding	24.24	30.69	1.26609
ST13	ENSG00000100380.13	protein_coding	275.8	349.16	1.26599
SNX27	ENSG00000143376.12	protein_coding	9.74	12.33	1.26591
FAM110A	ENSG00000125898.12	protein_coding	8.05	10.19	1.26584
DDX51	ENSG00000185163.9	protein_coding	7.75	9.81	1.26581
SMG9	ENSG00000105771.13	protein_coding	28.8	36.43	1.26493
CLDN4	ENSG00000189143.9	protein_coding	79.7	100.75	1.26412
PRKCSH	ENSG00000130175.9	protein_coding	405.66	512.67	1.26379
ELP2	ENSG00000134759.13	protein_coding	73.72	93.16	1.2637
SNAPC2	ENSG00000104976.11	protein_coding	50.64	63.99	1.26363
UBXN11	ENSG00000158062.20	protein_coding	19.12	24.16	1.2636
ZNF592	ENSG00000166716.9	protein_coding	6.38	8.06	1.26332
TRMU	ENSG00000100416.12	protein_coding	32.4	40.93	1.26327
ITPR3	ENSG00000096433.10	protein_coding	41.49	52.41	1.2632
ANK2	ENSG00000145362.17	protein_coding	5.17	6.53	1.26306
BRD1	ENSG00000100425.18	protein_coding	16.54	20.89	1.263
MCAT	ENSG00000100294.12	protein_coding	16.66	21.04	1.26291
PHLDA1	ENSG00000139289.13	protein_coding	27.43	34.64	1.26285
PAPLN	ENSG00000100767.15	protein_coding	26.56	33.54	1.2628
JMJD6	ENSG00000070495.14	protein_coding	42.02	53.06	1.26273
RPL26	ENSG00000161970.12	protein_coding	2716.49	3429.77	1.26257
RPS3	ENSG00000149273.14	protein_coding	1730.84	2184.96	1.26237
VKORC1	ENSG00000167397.14	protein_coding	344.21	434.51	1.26234
NGEF	ENSG00000066248.14	protein_coding	12.21	15.41	1.26208
SMUG1	ENSG00000123415.15	protein_coding	14.75	18.61	1.26169
NCOA7	ENSG00000111912.19	protein_coding	8.26	10.42	1.2615
CAMSAP1	ENSG00000130559.18	protein_coding	15.13	19.08	1.26107
RBM39	ENSG00000131051.21	protein_coding	186.67	235.38	1.26094
SMG8	ENSG00000167447.12	protein_coding	9.85	12.42	1.26091
COMMD6	ENSG00000188243.12	protein_coding	130.65	164.69	1.26054
MKLN1	ENSG00000128585.17	protein_coding	21.31	26.86	1.26044
ZMYM6	ENSG00000163867.16	protein_coding	14.63	18.44	1.26042
GRIPAP1	ENSG00000068400.13	protein_coding	24.9	31.38	1.26024
LRRC47	ENSG00000130764.9	protein_coding	31.09	39.18	1.26021
ELMOD3	ENSG00000115459.17	protein_coding	12.49	15.74	1.26021
CCDC149	ENSG00000181982.18	protein_coding	14.28	17.99	1.2598
RPL37	ENSG00000145592.13	protein_coding	1783.5	2246.52	1.25961
SH3YL1	ENSG00000035115.21	protein_coding	55.57	69.99	1.25949
HOXB3	ENSG00000120093.11	protein_coding	12.39	15.6	1.25908
CCDC9	ENSG00000105321.12	protein_coding	42.91	54.02	1.25891
MTHFR	ENSG00000177000.10	protein_coding	16.03	20.18	1.25889
F2R	ENSG00000181104.6	protein_coding	18.43	23.19	1.25827
TBC1D17	ENSG00000104946.11	protein_coding	28.42	35.74	1.25757
RGS9	ENSG00000108370.16	protein_coding	5.33	6.7	1.25704
LYSMD1	ENSG00000163155.11	protein_coding	7.94	9.98	1.25693
RNF214	ENSG00000167257.10	protein_coding	8.33	10.47	1.2569
PFKFB3	ENSG00000170525.18	protein_coding	84.01	105.55	1.2564
PEX6	ENSG00000124587.13	protein_coding	34.29	43.08	1.25634
MED23	ENSG00000112282.17	protein_coding	13.31	16.72	1.2562
TP53INP2	ENSG00000078804.12	protein_coding	6.37	8	1.25589
MAN2B1	ENSG00000104774.12	protein_coding	75.3	94.56	1.25578
EMC3	ENSG00000125037.12	protein_coding	58.38	73.31	1.25574
RPL19	ENSG00000108298.9	protein_coding	1968.09	2470.86	1.25546
UTP14A	ENSG00000156697.12	protein_coding	10.89	13.67	1.25528
PDE10A	ENSG00000112541.13	protein_coding	34.27	43.01	1.25503
MYOM3	ENSG00000142661.18	protein_coding	7.45	9.35	1.25503
MFSD10	ENSG00000109736.14	protein_coding	180.66	226.66	1.25462
TPT1	ENSG00000133112.16	protein_coding	2212.89	2776.19	1.25455
MAK16	ENSG00000198042.10	protein_coding	5.19	6.51	1.25434
PWP1	ENSG00000136045.11	protein_coding	40.58	50.9	1.25431
C19orf48	ENSG00000167747.13	protein_coding	34.15	42.82	1.25388
CHD6	ENSG00000124177.14	protein_coding	12.92	16.2	1.25387
CITED2	ENSG00000164442.9	protein_coding	114.19	143.15	1.25361
MAP2K7	ENSG00000076984.17	protein_coding	18.93	23.73	1.25357
GOLGA8B	ENSG00000215252.11	protein_coding	44.53	55.82	1.25354
DAB2	ENSG00000153071.14	protein_coding	80.95	101.47	1.25349
RBMX2	ENSG00000134597.14	protein_coding	23.57	29.54	1.25329
GTF3C1	ENSG00000077235.17	protein_coding	73.48	92.09	1.25327
RNF215	ENSG00000099999.14	protein_coding	21.8	27.32	1.25321
BCS1L	ENSG00000074582.12	protein_coding	28.1	35.21	1.25302
SLC17A9	ENSG00000101194.17	protein_coding	132.45	165.95	1.25293
PCNX1	ENSG00000100731.15	protein_coding	6.88	8.62	1.25291
TNFRSF10B	ENSG00000120889.12	protein_coding	76.23	95.47	1.25239
GPR107	ENSG00000148358.19	protein_coding	115.79	145.01	1.25235
SMDT1	ENSG00000183172.8	protein_coding	24.66	30.88	1.25223
CTBS	ENSG00000117151.12	protein_coding	36.76	46.03	1.25218
FAU	ENSG00000149806.10	protein_coding	446.55	559.11	1.25207
NPRL3	ENSG00000103148.15	protein_coding	46.96	58.79	1.25192
UCK1	ENSG00000130717.12	protein_coding	23.01	28.8	1.25163
ELP3	ENSG00000134014.16	protein_coding	22.37	27.99	1.25123
TAF1	ENSG00000147133.15	protein_coding	16.64	20.82	1.2512
SIRT3	ENSG00000142082.14	protein_coding	13.42	16.79	1.25112
ZFR	ENSG00000056097.15	protein_coding	46.17	57.76	1.25103
ZEB2	ENSG00000169554.17	protein_coding	22.24	27.82	1.2509
ERCC5	ENSG00000134899.18	protein_coding	38.18	47.74	1.25039
MTA1	ENSG00000182979.17	protein_coding	38.34	47.94	1.25039
CEP89	ENSG00000121289.17	protein_coding	14.47	18.09	1.25017
GZF1	ENSG00000125812.15	protein_coding	6.04	7.55	1.25
RBM18	ENSG00000119446.13	protein_coding	16.97	21.21	1.24985
ANG	ENSG00000214274.9	protein_coding	14.86	18.57	1.24966
CD74	ENSG00000019582.14	protein_coding	11.75	14.68	1.24936
TMEM136	ENSG00000181264.8	protein_coding	10.76	13.44	1.24907
DVL1	ENSG00000107404.18	protein_coding	46.54	58.13	1.24903
CLCN6	ENSG00000011021.21	protein_coding	12.57	15.7	1.24901
OSBPL2	ENSG00000130703.15	protein_coding	32.28	40.31	1.24876
DCP2	ENSG00000172795.15	protein_coding	14.69	18.34	1.24847
NSA2	ENSG00000164346.9	protein_coding	47.3	59.05	1.24841
RHOBTB3	ENSG00000164292.12	protein_coding	31.74	39.62	1.24827
CBX7	ENSG00000100307.12	protein_coding	9.15	11.42	1.24809
TNFRSF10D	ENSG00000173530.5	protein_coding	28.62	35.72	1.24808
NOTCH2	ENSG00000134250.18	protein_coding	60.8	75.87	1.24786
FBXO25	ENSG00000147364.16	protein_coding	14.45	18.03	1.24775
GLRB	ENSG00000109738.10	protein_coding	11.99	14.96	1.24771
NBPF1	ENSG00000219481.10	protein_coding	16.41	20.47	1.24741
LSR	ENSG00000105699.16	protein_coding	7.64	9.53	1.24738
PPRC1	ENSG00000148840.10	protein_coding	21.35	26.63	1.24731
FBXL8	ENSG00000135722.8	protein_coding	17.43	21.74	1.24727
ZNHIT3	ENSG00000273611.4	protein_coding	51.39	64.09	1.24713
CFAP36	ENSG00000163001.11	protein_coding	44.16	55.07	1.24706
PCGF1	ENSG00000115289.13	protein_coding	24.21	30.19	1.24701
CCDC59	ENSG00000133773.11	protein_coding	65.62	81.82	1.24688
UPF2	ENSG00000151461.19	protein_coding	16.83	20.98	1.24658
IFI27L2	ENSG00000119632.3	protein_coding	51.56	64.26	1.24631
CCDC14	ENSG00000175455.14	protein_coding	60.87	75.84	1.24593
TBC1D2B	ENSG00000167202.11	protein_coding	11.39	14.19	1.24583
LIMK2	ENSG00000182541.17	protein_coding	11.96	14.9	1.24582
SESN1	ENSG00000080546.13	protein_coding	12.86	16.02	1.24572
RND3	ENSG00000115963.13	protein_coding	54.6	68.01	1.2456
ZBTB33	ENSG00000177485.6	protein_coding	12.19	15.18	1.24528
SNX33	ENSG00000173548.8	protein_coding	12.5	15.56	1.2448
TOP3B	ENSG00000100038.19	protein_coding	12.14	15.1	1.24382
DHRS7	ENSG00000100612.13	protein_coding	54.6	67.91	1.24377
CCDC86	ENSG00000110104.11	protein_coding	16.66	20.72	1.2437
TCTN2	ENSG00000168778.11	protein_coding	22.16	27.55	1.24323
AXIN1	ENSG00000103126.14	protein_coding	16.83	20.92	1.24302
PRPF3	ENSG00000117360.12	protein_coding	27.76	34.5	1.2428
LMBRD1	ENSG00000168216.10	protein_coding	35.8	44.48	1.24246
SRSF11	ENSG00000116754.13	protein_coding	155.96	193.76	1.24237
AGAP9	ENSG00000204172.12	protein_coding	8.46	10.51	1.24232
LGALS3BP	ENSG00000108679.12	protein_coding	382.44	475.09	1.24226
KAT6A	ENSG00000083168.9	protein_coding	5.16	6.41	1.24225
STK11IP	ENSG00000144589.20	protein_coding	12.55	15.59	1.24223
ATP6V1C1	ENSG00000155097.11	protein_coding	43.76	54.36	1.24223
GPX3	ENSG00000211445.11	protein_coding	8.01	9.95	1.2422
LRRC23	ENSG00000010626.14	protein_coding	26.18	32.52	1.24217
FLNC	ENSG00000128591.15	protein_coding	213.68	265.42	1.24214
COG1	ENSG00000166685.11	protein_coding	25.69	31.91	1.24212
APH1B	ENSG00000138613.13	protein_coding	7.56	9.39	1.24206
ZNF358	ENSG00000198816.6	protein_coding	43.18	53.63	1.24201
GABBR1	ENSG00000204681.10	protein_coding	11.46	14.23	1.24171
BOD1L1	ENSG00000038219.12	protein_coding	25.79	32.02	1.24157
BRD2	ENSG00000204256.12	protein_coding	108.7	134.93	1.24131
SUGT1	ENSG00000165416.14	protein_coding	37.97	47.12	1.24098
TTC9C	ENSG00000162222.13	protein_coding	43.91	54.48	1.24072
APPL1	ENSG00000157500.10	protein_coding	29.21	36.24	1.24067
PIGT	ENSG00000124155.16	protein_coding	148.15	183.77	1.24043
BTN2A1	ENSG00000112763.15	protein_coding	17.64	21.88	1.24036
B2M	ENSG00000166710.17	protein_coding	4868.5	6038.48	1.24032
C11orf80	ENSG00000173715.15	protein_coding	15.61	19.36	1.24023
FLOT1	ENSG00000137312.14	protein_coding	214.91	266.53	1.24019
SIPA1	ENSG00000213445.9	protein_coding	18.83	23.35	1.24004
SH2B1	ENSG00000178188.14	protein_coding	25.97	32.2	1.23989
CHD9	ENSG00000177200.15	protein_coding	11.97	14.84	1.23977
WSB2	ENSG00000176871.8	protein_coding	73.99	91.7	1.23936
ZNF354B	ENSG00000178338.10	protein_coding	8.4	10.41	1.23929
PARP9	ENSG00000138496.16	protein_coding	11.37	14.09	1.23923
ERCC3	ENSG00000163161.12	protein_coding	29.68	36.78	1.23922
PDP1	ENSG00000164951.15	protein_coding	27.93	34.61	1.23917
OBSL1	ENSG00000124006.14	protein_coding	69.76	86.44	1.23911
RAB38	ENSG00000123892.11	protein_coding	7.45	9.23	1.23893
MRPS5	ENSG00000144029.11	protein_coding	49.21	60.96	1.23877
CYP3A5	ENSG00000106258.13	protein_coding	7.75	9.6	1.23871
TDRD3	ENSG00000083544.13	protein_coding	9.68	11.99	1.23864
MTPAP	ENSG00000107951.13	protein_coding	8.13	10.07	1.23862
SBNO2	ENSG00000064932.15	protein_coding	44.24	54.79	1.23847
YBX3	ENSG00000060138.12	protein_coding	386.38	478.52	1.23847
SNX29	ENSG00000048471.13	protein_coding	6.38	7.9	1.23824
UBXN6	ENSG00000167671.11	protein_coding	144.52	178.93	1.2381
RNF169	ENSG00000166439.5	protein_coding	5.84	7.23	1.23801
ATXN1	ENSG00000124788.17	protein_coding	8.45	10.46	1.23787
DDX19B	ENSG00000157349.16	protein_coding	26.57	32.89	1.23786
SNTB1	ENSG00000172164.13	protein_coding	35.12	43.47	1.23776
TXN2	ENSG00000100348.9	protein_coding	65.37	80.9	1.23757
CD47	ENSG00000196776.14	protein_coding	62.39	77.21	1.23754
RPS19BP1	ENSG00000187051.8	protein_coding	89.98	111.34	1.23739
SAFB	ENSG00000160633.12	protein_coding	48.93	60.54	1.23728
IPMK	ENSG00000151151.5	protein_coding	10.08	12.47	1.2371
ZNF449	ENSG00000173275.12	protein_coding	8.14	10.07	1.2371
NR3C1	ENSG00000113580.14	protein_coding	103.82	128.42	1.23695
BST2	ENSG00000130303.12	protein_coding	600.29	742.52	1.23694
ABCA7	ENSG00000064687.12	protein_coding	6.29	7.78	1.23688
GTF2IRD1	ENSG00000006704.10	protein_coding	67.63	83.64	1.23673
COX7C	ENSG00000127184.11	protein_coding	277.52	343.21	1.2367
RPS9	ENSG00000170889.13	protein_coding	1520.69	1880.43	1.23656
ATF1	ENSG00000123268.8	protein_coding	13.28	16.42	1.23645
KHNYN	ENSG00000100441.9	protein_coding	16.48	20.37	1.23604
VIM	ENSG00000026025.14	protein_coding	4879.83	6031.15	1.23593
DNAJA3	ENSG00000103423.13	protein_coding	41.03	50.71	1.23592
GNL2	ENSG00000134697.12	protein_coding	69.27	85.57	1.23531
RP9	ENSG00000164610.8	protein_coding	16.48	20.35	1.23483
KANSL1L	ENSG00000144445.16	protein_coding	15.56	19.21	1.23458
B4GALT1	ENSG00000086062.12	protein_coding	113.33	139.87	1.23418
DPH5	ENSG00000117543.20	protein_coding	39.85	49.18	1.23413
FDXR	ENSG00000161513.11	protein_coding	37.95	46.82	1.23373
JOSD1	ENSG00000100221.10	protein_coding	67.9	83.77	1.23373
KCTD18	ENSG00000155729.12	protein_coding	14.28	17.61	1.23319
FAM73A	ENSG00000180488.14	protein_coding	26.52	32.7	1.23303
RPL21	ENSG00000122026.10	protein_coding	1281.42	1579.49	1.23261
HPCAL1	ENSG00000115756.12	protein_coding	313.03	385.84	1.2326
GRB14	ENSG00000115290.9	protein_coding	7.71	9.5	1.23217
ATM	ENSG00000149311.17	protein_coding	36.01	44.37	1.23216
CXorf23	ENSG00000173681.16	protein_coding	6.86	8.45	1.23178
ZNF12	ENSG00000164631.18	protein_coding	14.2	17.49	1.23169
CREG1	ENSG00000143162.7	protein_coding	62.89	77.46	1.23167
CYTH2	ENSG00000105443.13	protein_coding	33.58	41.35	1.23139
TAPBP	ENSG00000231925.11	protein_coding	252.66	311.08	1.23122
RPL41	ENSG00000229117.8	protein_coding	2233.25	2748.99	1.23094
TBC1D8	ENSG00000204634.12	protein_coding	16.76	20.63	1.23091
TATDN1	ENSG00000147687.17	protein_coding	62.24	76.61	1.23088
FAM160B2	ENSG00000158863.21	protein_coding	22.71	27.95	1.23074
SARS2	ENSG00000104835.14	protein_coding	8.02	9.87	1.23067
FEM1B	ENSG00000169018.5	protein_coding	12.14	14.94	1.23064
ZNF511	ENSG00000198546.14	protein_coding	13.93	17.14	1.23044
ZNF576	ENSG00000124444.15	protein_coding	6.38	7.85	1.23041
SMIM11A	ENSG00000205670.10	protein_coding	5.39	6.63	1.23006
R3HCC1	ENSG00000104679.10	protein_coding	10.45	12.85	1.22967
HEATR6	ENSG00000068097.14	protein_coding	15.65	19.24	1.22939
TTC39C	ENSG00000168234.12	protein_coding	6.28	7.72	1.2293
NUDCD3	ENSG00000015676.17	protein_coding	43.55	53.53	1.22916
NUCB1	ENSG00000104805.15	protein_coding	281.3	345.72	1.22901
GRINA	ENSG00000178719.16	protein_coding	209.92	257.97	1.2289
REXO4	ENSG00000148300.11	protein_coding	24.84	30.52	1.22866
WASL	ENSG00000106299.7	protein_coding	55.9	68.67	1.22844
ARFGEF1	ENSG00000066777.8	protein_coding	57.22	70.29	1.22842
OSMR	ENSG00000145623.12	protein_coding	160.39	197.01	1.22832
ATN1	ENSG00000111676.14	protein_coding	52.56	64.56	1.22831
RECQL5	ENSG00000108469.14	protein_coding	25.1	30.83	1.22829
ZNF622	ENSG00000173545.4	protein_coding	48.47	59.53	1.22818
BBC3	ENSG00000105327.16	protein_coding	24.28	29.82	1.22817
ARL4D	ENSG00000175906.4	protein_coding	16.83	20.67	1.22816
CEP70	ENSG00000114107.8	protein_coding	43.23	53.09	1.22808
RPL39	ENSG00000198918.7	protein_coding	4048.18	4970.21	1.22776
GOLGA2	ENSG00000167110.16	protein_coding	204.37	250.89	1.22763
COBLL1	ENSG00000082438.15	protein_coding	24.37	29.9	1.22692
FAM84B	ENSG00000168672.3	protein_coding	79.21	97.16	1.22661
TCEAL4	ENSG00000133142.17	protein_coding	58.5	71.75	1.2265
HNF4G	ENSG00000164749.11	protein_coding	12.06	14.79	1.22637
MIDN	ENSG00000167470.12	protein_coding	29.82	36.57	1.22636
NUDT13	ENSG00000166321.13	protein_coding	6.01	7.37	1.22629
AZI2	ENSG00000163512.13	protein_coding	38.98	47.8	1.22627
PARP11	ENSG00000111224.13	protein_coding	7.16	8.78	1.22626
PSMF1	ENSG00000125818.17	protein_coding	82.1	100.63	1.2257
OSER1	ENSG00000132823.10	protein_coding	49.38	60.51	1.22539
TROVE2	ENSG00000116747.12	protein_coding	20.3	24.87	1.22512
AMOTL2	ENSG00000114019.14	protein_coding	124.83	152.89	1.22479
CLASRP	ENSG00000104859.14	protein_coding	28.31	34.67	1.22466
MRPL2	ENSG00000112651.11	protein_coding	50.76	62.14	1.22419
MYO9A	ENSG00000066933.15	protein_coding	11.43	13.99	1.22397
CTSA	ENSG00000064601.16	protein_coding	266.39	326.04	1.22392
TSEN54	ENSG00000182173.12	protein_coding	15.37	18.81	1.22381
AFTPH	ENSG00000119844.15	protein_coding	26.91	32.93	1.22371
ZSWIM8	ENSG00000214655.10	protein_coding	46.94	57.43	1.22348
ZNF146	ENSG00000167635.11	protein_coding	59.96	73.35	1.22332
GRB7	ENSG00000141738.13	protein_coding	11.56	14.14	1.22318
VPS13C	ENSG00000129003.15	protein_coding	14.16	17.32	1.22316
ZNF18	ENSG00000154957.13	protein_coding	5.11	6.25	1.22309
ZNF74	ENSG00000185252.18	protein_coding	5.11	6.25	1.22309
GAMT	ENSG00000130005.11	protein_coding	60.89	74.47	1.22303
SMAD7	ENSG00000101665.8	protein_coding	19.5	23.84	1.22256
MSL1	ENSG00000188895.11	protein_coding	42.74	52.25	1.22251
SART3	ENSG00000075856.11	protein_coding	28.95	35.39	1.22245
TVP23C-CDRT4	ENSG00000259024.6	protein_coding	10.4	12.71	1.22212
NGLY1	ENSG00000151092.16	protein_coding	21.98	26.86	1.22202
DLC1	ENSG00000164741.14	protein_coding	14.73	18	1.222
GCLC	ENSG00000001084.10	protein_coding	9.1	11.12	1.22198
TOB2	ENSG00000183864.4	protein_coding	20.46	25	1.2219
CEBPZ	ENSG00000115816.14	protein_coding	37.13	45.36	1.22165
C16orf52	ENSG00000185716.11	protein_coding	9.7	11.85	1.22165
AP1G2	ENSG00000213983.11	protein_coding	20.53	25.08	1.22163
RPL7A	ENSG00000148303.16	protein_coding	3798.52	4639.92	1.22151
CDKL3	ENSG00000006837.11	protein_coding	5.6	6.84	1.22143
TANC2	ENSG00000170921.14	protein_coding	40.67	49.67	1.22129
DCUN1D4	ENSG00000109184.14	protein_coding	35.6	43.47	1.22107
SIDT2	ENSG00000149577.15	protein_coding	14.53	17.74	1.22092
IMP4	ENSG00000136718.9	protein_coding	69.54	84.9	1.22088
RAB29	ENSG00000117280.12	protein_coding	19.24	23.48	1.22037
TCF25	ENSG00000141002.18	protein_coding	129.86	158.42	1.21993
RPS27A	ENSG00000143947.12	protein_coding	1406.97	1716.25	1.21982
RPL8	ENSG00000161016.16	protein_coding	3419.47	4171.1	1.21981
CHRNB1	ENSG00000170175.10	protein_coding	8.89	10.84	1.21935
NT5C3A	ENSG00000122643.18	protein_coding	26.14	31.87	1.2192
PTER	ENSG00000165983.14	protein_coding	19.12	23.31	1.21914
TRIM28	ENSG00000130726.11	protein_coding	128.07	156.1	1.21886
DUSP23	ENSG00000158716.8	protein_coding	53.88	65.65	1.21845
FUK	ENSG00000157353.16	protein_coding	9.48	11.55	1.21835
FBXL5	ENSG00000118564.14	protein_coding	50.38	61.38	1.21834
PTPA	ENSG00000119383.19	protein_coding	270.02	328.96	1.21828
SH3PXD2A	ENSG00000107957.16	protein_coding	5.32	6.48	1.21805
GEM	ENSG00000164949.7	protein_coding	10.68	13	1.21723
ALPK1	ENSG00000073331.17	protein_coding	18.01	21.92	1.2171
RRNAD1	ENSG00000143303.11	protein_coding	28.1	34.2	1.21708
MTERF4	ENSG00000122085.16	protein_coding	19.49	23.72	1.21703
POLR1B	ENSG00000125630.15	protein_coding	8.94	10.88	1.217
HLA-DMA	ENSG00000204257.14	protein_coding	5.3	6.45	1.21698
TRMT5	ENSG00000126814.6	protein_coding	5.07	6.17	1.21696
METAP2	ENSG00000111142.13	protein_coding	81.72	99.45	1.21696
CCDC25	ENSG00000147419.16	protein_coding	11.62	14.14	1.21687
CNBP	ENSG00000169714.16	protein_coding	310.38	377.66	1.21677
CAPN7	ENSG00000131375.9	protein_coding	19.21	23.37	1.21655
EGFR	ENSG00000146648.16	protein_coding	94.07	114.44	1.21654
NEDD9	ENSG00000111859.16	protein_coding	30.86	37.54	1.21646
PEX5	ENSG00000139197.10	protein_coding	25.23	30.68	1.21601
SLK	ENSG00000065613.13	protein_coding	18.8	22.86	1.21596
RAB33B	ENSG00000172007.5	protein_coding	10.28	12.5	1.21595
KIAA0753	ENSG00000198920.9	protein_coding	9.93	12.07	1.21551
UBXN7	ENSG00000163960.11	protein_coding	19.35	23.52	1.2155
USP37	ENSG00000135913.10	protein_coding	8.22	9.99	1.21533
PSMB8	ENSG00000204264.8	protein_coding	93.95	114.17	1.21522
RELB	ENSG00000104856.13	protein_coding	15.69	19.06	1.21479
IFI27	ENSG00000165949.12	protein_coding	16.02	19.46	1.21473
TPRN	ENSG00000176058.11	protein_coding	12.95	15.73	1.21467
ZC3H3	ENSG00000014164.6	protein_coding	20.22	24.56	1.21464
PKP4	ENSG00000144283.21	protein_coding	42.76	51.93	1.21445
SAMD8	ENSG00000156671.12	protein_coding	13.95	16.94	1.21434
UNC119B	ENSG00000175970.9	protein_coding	33.75	40.98	1.21422
KLF6	ENSG00000067082.14	protein_coding	95.23	115.63	1.21422
P4HA2	ENSG00000072682.18	protein_coding	212.42	257.85	1.21387
PCGF2	ENSG00000277258.4	protein_coding	18.66	22.65	1.21383
ZDHHC9	ENSG00000188706.12	protein_coding	53.42	64.84	1.21378
ST6GALNAC4	ENSG00000136840.18	protein_coding	19.79	24.02	1.21374
TMEM116	ENSG00000198270.12	protein_coding	16.58	20.12	1.21351
HOXD4	ENSG00000170166.5	protein_coding	6.66	8.08	1.21321
C8orf58	ENSG00000241852.9	protein_coding	11.03	13.38	1.21306
PFKM	ENSG00000152556.15	protein_coding	53.04	64.34	1.21305
LPCAT4	ENSG00000176454.13	protein_coding	37.31	45.25	1.21281
MOB1B	ENSG00000173542.8	protein_coding	13.91	16.87	1.2128
LOXL2	ENSG00000134013.15	protein_coding	841.71	1020.79	1.21276
RPS15	ENSG00000115268.9	protein_coding	2275.64	2758.36	1.21212
GCNT2	ENSG00000111846.15	protein_coding	17.64	21.38	1.21202
MT-ND3	ENSG00000198840.2	protein_coding	6441.81	7807.49	1.212
S100PBP	ENSG00000116497.17	protein_coding	24.3	29.45	1.21193
RNF6	ENSG00000127870.16	protein_coding	23.69	28.71	1.2119
TIPARP	ENSG00000163659.12	protein_coding	43.68	52.93	1.21177
ARHGEF5	ENSG00000050327.14	protein_coding	38.37	46.49	1.21162
RPAP1	ENSG00000103932.11	protein_coding	11.38	13.78	1.2109
IL1R1	ENSG00000115594.11	protein_coding	11.76	14.24	1.21088
IRS1	ENSG00000169047.5	protein_coding	12.14	14.7	1.21087
ZNF397	ENSG00000186812.12	protein_coding	6.45	7.81	1.21085
CSPP1	ENSG00000104218.14	protein_coding	16.99	20.56	1.21012
GPN2	ENSG00000142751.14	protein_coding	15.81	19.13	1.20999
BTBD7	ENSG00000011114.14	protein_coding	13.48	16.31	1.20994
VASN	ENSG00000168140.4	protein_coding	77.26	93.47	1.20981
PSMB9	ENSG00000240065.7	protein_coding	45.4	54.91	1.20947
KANK1	ENSG00000107104.18	protein_coding	23.98	29	1.20934
SREK1IP1	ENSG00000153006.15	protein_coding	5.93	7.17	1.20911
PDE4DIP	ENSG00000178104.19	protein_coding	25.21	30.48	1.20904
CRIP2	ENSG00000182809.10	protein_coding	116.66	141.03	1.2089
RNF141	ENSG00000110315.6	protein_coding	19.2	23.21	1.20885
NCOR2	ENSG00000196498.13	protein_coding	107.7	130.19	1.20882
SFSWAP	ENSG00000061936.9	protein_coding	23.77	28.73	1.20867
TRABD2B	ENSG00000269113.3	protein_coding	5.18	6.26	1.20849
OGDH	ENSG00000105953.14	protein_coding	34.12	41.23	1.20838
C18orf25	ENSG00000152242.10	protein_coding	10.47	12.65	1.20821
CDADC1	ENSG00000102543.14	protein_coding	6.58	7.95	1.20821
C10orf11	ENSG00000148655.14	protein_coding	7.16	8.65	1.2081
RPL14	ENSG00000188846.13	protein_coding	1066.7	1288.59	1.20802
CXorf56	ENSG00000018610.13	protein_coding	12.85	15.52	1.20778
TMBIM1	ENSG00000135926.13	protein_coding	149.71	180.8	1.20767
VWA5A	ENSG00000110002.15	protein_coding	5.35	6.46	1.20748
MFSD6	ENSG00000151690.14	protein_coding	25.7	31.03	1.20739
LZTS2	ENSG00000107816.17	protein_coding	71.91	86.82	1.20734
RPS11	ENSG00000142534.6	protein_coding	2065.66	2493.79	1.20726
CCDC130	ENSG00000104957.13	protein_coding	29.29	35.35	1.2069
RNF19B	ENSG00000116514.16	protein_coding	20.01	24.15	1.2069
ARHGAP5	ENSG00000100852.12	protein_coding	21.03	25.38	1.20685
GMPR2	ENSG00000100938.17	protein_coding	40.25	48.57	1.20671
NIPA1	ENSG00000170113.15	protein_coding	20.37	24.58	1.20668
GGA2	ENSG00000103365.15	protein_coding	34.89	42.1	1.20665
INTS10	ENSG00000104613.11	protein_coding	35.28	42.57	1.20663
AMH	ENSG00000104899.6	protein_coding	7.65	9.23	1.20654
SAV1	ENSG00000151748.14	protein_coding	12.84	15.49	1.20639
TFIP11	ENSG00000100109.16	protein_coding	15.46	18.65	1.20634
RPL35A	ENSG00000182899.14	protein_coding	1824.2	2200.58	1.20633
PDRG1	ENSG00000088356.5	protein_coding	24.25	29.25	1.20619
CHML	ENSG00000203668.2	protein_coding	7.67	9.25	1.206
VPS11	ENSG00000160695.14	protein_coding	14.04	16.93	1.20584
STX16	ENSG00000124222.22	protein_coding	96.66	116.55	1.20577
ATP5G2	ENSG00000135390.17	protein_coding	496.42	598.53	1.20569
TMUB2	ENSG00000168591.15	protein_coding	36.81	44.38	1.20565
ZNF616	ENSG00000204611.6	protein_coding	6.03	7.27	1.20564
ADPRHL2	ENSG00000116863.10	protein_coding	31.62	38.12	1.20557
TCF7L2	ENSG00000148737.16	protein_coding	5.79	6.98	1.20553
FAM98B	ENSG00000171262.11	protein_coding	13.97	16.84	1.20544
MKRN1	ENSG00000133606.10	protein_coding	90.54	109.14	1.20543
CCDC117	ENSG00000159873.9	protein_coding	21.47	25.88	1.2054
TNFSF9	ENSG00000125657.4	protein_coding	57.07	68.77	1.20501
CCDC43	ENSG00000180329.13	protein_coding	16.46	19.83	1.20474
TTC33	ENSG00000113638.13	protein_coding	18.37	22.13	1.20468
RALGDS	ENSG00000160271.14	protein_coding	21.16	25.49	1.20463
FOXJ3	ENSG00000198815.8	protein_coding	22.93	27.62	1.20454
DDB2	ENSG00000134574.11	protein_coding	93.5	112.58	1.20406
FEM1C	ENSG00000145780.7	protein_coding	10.88	13.1	1.20404
YEATS4	ENSG00000127337.6	protein_coding	18.43	22.19	1.20402
TNPO2	ENSG00000105576.15	protein_coding	62.63	75.4	1.2039
CTTN	ENSG00000085733.15	protein_coding	124.75	150.18	1.20385
UQCRC2	ENSG00000140740.10	protein_coding	164.14	197.59	1.20379
CTC1	ENSG00000178971.13	protein_coding	7.95	9.57	1.20377
MGEA5	ENSG00000198408.13	protein_coding	88.57	106.61	1.20368
HECTD4	ENSG00000173064.11	protein_coding	18.32	22.05	1.2036
C1orf27	ENSG00000157181.15	protein_coding	14.05	16.91	1.20356
DLEU1	ENSG00000176124.11	protein_coding	15.28	18.39	1.20353
DZIP3	ENSG00000198919.12	protein_coding	11.28	13.57	1.20301
ACBD3	ENSG00000182827.8	protein_coding	73.65	88.6	1.20299
RAC2	ENSG00000128340.14	protein_coding	245.08	294.79	1.20283
PCF11	ENSG00000165494.11	protein_coding	20.37	24.5	1.20275
PRKRIP1	ENSG00000128563.13	protein_coding	32.37	38.93	1.20266
ZNF419	ENSG00000105136.19	protein_coding	6.17	7.42	1.20259
CD55	ENSG00000196352.14	protein_coding	41.01	49.29	1.2019
KIAA1429	ENSG00000164944.11	protein_coding	52.54	63.14	1.20175
TMEM256-PLSCR3	ENSG00000187838.16	protein_coding	24.31	29.21	1.20156
BSDC1	ENSG00000160058.18	protein_coding	45.45	54.61	1.20154
PDIK1L	ENSG00000175087.9	protein_coding	5.96	7.16	1.20134
NEPRO	ENSG00000163608.14	protein_coding	22.1	26.54	1.2009
BCL9L	ENSG00000186174.12	protein_coding	38.17	45.83	1.20068
MAP4K5	ENSG00000012983.11	protein_coding	23.93	28.73	1.20059
KLF13	ENSG00000169926.10	protein_coding	18.55	22.27	1.20054
PRPF39	ENSG00000185246.17	protein_coding	12.22	14.67	1.20049
AGRN	ENSG00000188157.13	protein_coding	489.98	588.21	1.20048
CEP57	ENSG00000166037.10	protein_coding	43.36	52.05	1.20042
CDKN1B	ENSG00000111276.10	protein_coding	68.66	82.41	1.20026
NAP1L1	ENSG00000187109.13	protein_coding	954.93	1145.87	1.19995
POLDIP3	ENSG00000100227.17	protein_coding	35.77	42.92	1.19989
FNBP1	ENSG00000187239.16	protein_coding	21	25.19	1.19952
CDV3	ENSG00000091527.15	protein_coding	141.96	170.27	1.19942
CNOT10	ENSG00000182973.18	protein_coding	10.94	13.12	1.19927
SLC33A1	ENSG00000169359.13	protein_coding	24.91	29.87	1.19912
POU2F1	ENSG00000143190.21	protein_coding	5.83	6.99	1.19897
RAB3GAP2	ENSG00000118873.15	protein_coding	20.88	25.03	1.19875
CDKAL1	ENSG00000145996.11	protein_coding	5.74	6.88	1.19861
HIF1A	ENSG00000100644.16	protein_coding	17.63	21.13	1.19853
ECH1	ENSG00000104823.8	protein_coding	104.64	125.38	1.1982
C19orf54	ENSG00000188493.14	protein_coding	11.36	13.61	1.19806
ZSCAN32	ENSG00000140987.19	protein_coding	9.8	11.74	1.19796
BSG	ENSG00000172270.18	protein_coding	807.91	967.7	1.19778
DDX3Y	ENSG00000067048.16	protein_coding	55.19	66.1	1.19768
PDXDC1	ENSG00000179889.18	protein_coding	158.81	190.2	1.19766
KMT5C	ENSG00000133247.13	protein_coding	9.31	11.15	1.19764
NDUFA5	ENSG00000128609.14	protein_coding	97.96	117.32	1.19763
ZNF276	ENSG00000158805.11	protein_coding	8.31	9.95	1.19735
FAM149B1	ENSG00000138286.14	protein_coding	14.71	17.61	1.19714
RSBN1	ENSG00000081019.13	protein_coding	7.82	9.36	1.19693
EFL1	ENSG00000140598.13	protein_coding	10.17	12.17	1.19666
SECISBP2L	ENSG00000138593.8	protein_coding	15.42	18.45	1.1965
AAAS	ENSG00000094914.12	protein_coding	55.33	66.2	1.19646
MTA3	ENSG00000057935.13	protein_coding	32.26	38.59	1.19622
NBEAL2	ENSG00000160796.16	protein_coding	14.07	16.83	1.19616
RPS6KA5	ENSG00000100784.10	protein_coding	8.52	10.19	1.19601
PTCD3	ENSG00000132300.18	protein_coding	39.92	47.74	1.19589
SPIDR	ENSG00000164808.16	protein_coding	50.35	60.21	1.19583
STK16	ENSG00000115661.13	protein_coding	37.22	44.5	1.19559
STX3	ENSG00000166900.15	protein_coding	15.04	17.98	1.19548
LGALS8	ENSG00000116977.18	protein_coding	34.96	41.79	1.19537
PYURF	ENSG00000145337.4	protein_coding	35.21	42.08	1.19512
MAPRE2	ENSG00000166974.12	protein_coding	9.38	11.21	1.1951
SCRN2	ENSG00000141295.13	protein_coding	44.01	52.58	1.19473
GDI1	ENSG00000203879.11	protein_coding	145.68	174.04	1.19467
ZNF44	ENSG00000197857.13	protein_coding	5.14	6.14	1.19455
CA13	ENSG00000185015.7	protein_coding	5.4	6.45	1.19444
BCKDK	ENSG00000103507.13	protein_coding	55.21	65.93	1.19417
FBXO32	ENSG00000156804.7	protein_coding	9.48	11.32	1.19409
ARID1B	ENSG00000049618.22	protein_coding	12.99	15.51	1.194
JTB	ENSG00000143543.14	protein_coding	157.6	188.17	1.19397
RCAN3	ENSG00000117602.11	protein_coding	9.8	11.7	1.19388
EIF2AK3	ENSG00000172071.11	protein_coding	36.33	43.37	1.19378
PPIE	ENSG00000084072.16	protein_coding	21.13	25.22	1.19356
TBC1D2	ENSG00000095383.19	protein_coding	50.81	60.64	1.19347
EML4	ENSG00000143924.18	protein_coding	30.41	36.28	1.19303
RPS16	ENSG00000105193.8	protein_coding	2536.32	3025.64	1.19293
RALGPS2	ENSG00000116191.17	protein_coding	21.35	25.46	1.19251
WBP1L	ENSG00000166272.16	protein_coding	9.87	11.77	1.1925
IQSEC1	ENSG00000144711.13	protein_coding	6.24	7.44	1.19231
OSCP1	ENSG00000116885.18	protein_coding	8.43	10.05	1.19217
TMEM133	ENSG00000170647.3	protein_coding	7.13	8.5	1.19215
RINT1	ENSG00000135249.7	protein_coding	41.65	49.63	1.1916
GUCD1	ENSG00000138867.16	protein_coding	99.52	118.57	1.19142
KDM7A	ENSG00000006459.10	protein_coding	6.75	8.04	1.19111
SPR	ENSG00000116096.5	protein_coding	24.63	29.32	1.19042
PIGB	ENSG00000069943.9	protein_coding	13.25	15.77	1.19019
BAG5	ENSG00000166170.9	protein_coding	8.21	9.77	1.19001
PAX2	ENSG00000075891.21	protein_coding	10.69	12.72	1.1899
GLRX	ENSG00000173221.13	protein_coding	45.71	54.38	1.18967
MOB2	ENSG00000182208.12	protein_coding	11.81	14.05	1.18967
AC090498.1	ENSG00000279483.1	protein_coding	2401.22	2856.17	1.18947
WHSC1L1	ENSG00000147548.16	protein_coding	18.9	22.48	1.18942
CCDC74A	ENSG00000163040.14	protein_coding	46.04	54.76	1.1894
ANAPC13	ENSG00000129055.12	protein_coding	35.28	41.96	1.18934
GATA6	ENSG00000141448.8	protein_coding	10.33	12.28	1.18877
HELZ2	ENSG00000130589.16	protein_coding	18.24	21.68	1.1886
NMD3	ENSG00000169251.12	protein_coding	83.04	98.7	1.18858
TXNRD3	ENSG00000197763.13	protein_coding	13.79	16.39	1.18854
FAM47E-STBD1	ENSG00000272414.5	protein_coding	10.14	12.05	1.18836
EHHADH	ENSG00000113790.10	protein_coding	21.25	25.25	1.18824
FBXO31	ENSG00000103264.16	protein_coding	14.93	17.74	1.18821
CTPS2	ENSG00000047230.14	protein_coding	12.38	14.71	1.18821
DDR1	ENSG00000204580.12	protein_coding	30.74	36.52	1.18803
AUH	ENSG00000148090.11	protein_coding	27.56	32.74	1.18795
PCYOX1	ENSG00000116005.11	protein_coding	37.35	44.36	1.18768
RPS24	ENSG00000138326.18	protein_coding	5083.59	6035.94	1.18734
HYI	ENSG00000178922.16	protein_coding	78.85	93.6	1.18706
EVL	ENSG00000196405.12	protein_coding	22.42	26.61	1.18689
DRG1	ENSG00000185721.11	protein_coding	63.22	75.02	1.18665
CCDC82	ENSG00000149231.11	protein_coding	25.45	30.2	1.18664
USP20	ENSG00000136878.12	protein_coding	15.68	18.6	1.18622
TMEM259	ENSG00000182087.12	protein_coding	175.03	207.6	1.18608
KLHL21	ENSG00000162413.16	protein_coding	10.65	12.63	1.18592
ZDHHC11	ENSG00000188818.12	protein_coding	6.57	7.79	1.18569
TNFSF10	ENSG00000121858.10	protein_coding	858.52	1017.94	1.18569
MSL2	ENSG00000174579.3	protein_coding	13.49	15.99	1.18532
SUGP1	ENSG00000105705.15	protein_coding	15.71	18.62	1.18523
C1RL	ENSG00000139178.10	protein_coding	23.27	27.58	1.18522
ZNF185	ENSG00000147394.18	protein_coding	6.87	8.14	1.18486
IFT46	ENSG00000118096.7	protein_coding	14.5	17.18	1.18483
SFXN4	ENSG00000183605.16	protein_coding	19.12	22.65	1.18462
PPARA	ENSG00000186951.16	protein_coding	19.34	22.91	1.18459
RPS29	ENSG00000213741.8	protein_coding	2067.79	2448.9	1.18431
MBNL2	ENSG00000139793.18	protein_coding	75.43	89.33	1.18428
TTC3	ENSG00000182670.13	protein_coding	143.57	170.02	1.18423
RUNX2	ENSG00000124813.20	protein_coding	26.83	31.77	1.18412
LRTOMT	ENSG00000184154.13	protein_coding	7.23	8.56	1.18396
ICAM1	ENSG00000090339.8	protein_coding	156.21	184.89	1.1836
DYM	ENSG00000141627.13	protein_coding	27.61	32.67	1.18327
[truncated: 7,875 more rows]

## Sheet: Sheet2
Supplementary Table 2. Gene expression profile in M62 cell transfected with shSCM1 and shAXL1
GeneName	GeneID	GeneType	M62C	M62K	Fold change
MYO1F	ENSG00000142347.16	protein_coding	1.5	7.74	5.16
SNURF	ENSG00000273173.5	protein_coding	1.27	6.45	5.07874
ZSCAN23	ENSG00000187987.9	protein_coding	1.47	6.03	4.10204
RRP15	ENSG00000067533.5	protein_coding	5.14	20.33	3.95525
MLLT10	ENSG00000078403.16	protein_coding	16.56	65.02	3.92633
SERPINB2	ENSG00000197632.8	protein_coding	7.91	29.5	3.72946
ANKRD18B	ENSG00000230453.9	protein_coding	4.16	15.5	3.72596
ANGPTL4	ENSG00000167772.11	protein_coding	1.94	6.91	3.56186
RP1	ENSG00000104237.7	protein_coding	3.72	12.93	3.47581
RP11-73M18.2	ENSG00000256500.5	protein_coding	1.12	3.89	3.47321
SULT1A3	ENSG00000261052.5	protein_coding	3.01	9.15	3.03987
GIN1	ENSG00000145723.16	protein_coding	1.77	5.37	3.0339
NDUFB5	ENSG00000136521.12	protein_coding	76.15	223.08	2.92948
C4BPB	ENSG00000123843.12	protein_coding	2.13	6.18	2.90141
SYCE1L	ENSG00000205078.5	protein_coding	4.43	12.85	2.90068
CDK3	ENSG00000250506.6	protein_coding	1.47	4.24	2.88435
B2M	ENSG00000166710.17	protein_coding	1.52	4.36	2.86842
CHAC2	ENSG00000143942.4	protein_coding	1.3	3.7	2.84615
SAA2	ENSG00000134339.8	protein_coding	6.41	17.8	2.77691
ULK4	ENSG00000168038.10	protein_coding	1.06	2.94	2.77358
ELL3	ENSG00000128886.11	protein_coding	1.09	3.02	2.77064
SGK3	ENSG00000104205.12	protein_coding	1.77	4.9	2.76836
RPS6KL1	ENSG00000198208.11	protein_coding	1.48	4.09	2.76351
RP11-463D19.2	ENSG00000258677.2	protein_coding	1.16	3.2	2.75862
RALGPS1	ENSG00000136828.18	protein_coding	1.1	3.01	2.73636
ATP8B2	ENSG00000143515.16	protein_coding	5.94	16.22	2.73064
SH3BGR	ENSG00000185437.13	protein_coding	2.07	5.61	2.71014
ENKD1	ENSG00000124074.11	protein_coding	2.35	6.22	2.64681
CLHC1	ENSG00000162994.15	protein_coding	6.1	15.96	2.61639
EMP1	ENSG00000134531.9	protein_coding	4.18	10.91	2.61005
PRELID3A	ENSG00000141391.13	protein_coding	2.75	7.17	2.60727
METTL12	ENSG00000214756.7	protein_coding	2.74	7.06	2.57664
DHRS12	ENSG00000102796.10	protein_coding	1.28	3.21	2.50781
CD83	ENSG00000112149.9	protein_coding	2.25	5.61	2.49333
MAGIX	ENSG00000269313.5	protein_coding	1.08	2.69	2.49074
DNAH14	ENSG00000185842.14	protein_coding	3.97	9.72	2.44836
MFAP3L	ENSG00000198948.11	protein_coding	1.2	2.92	2.43333
SETD9	ENSG00000155542.11	protein_coding	2.82	6.86	2.43262
PUS10	ENSG00000162927.13	protein_coding	2.37	5.75	2.42616
PIH1D2	ENSG00000150773.10	protein_coding	1.41	3.42	2.42553
ZNF229	ENSG00000278318.4	protein_coding	1.42	3.44	2.42254
PLA2G6	ENSG00000184381.18	protein_coding	5.16	12.42	2.40698
CCNE2	ENSG00000175305.17	protein_coding	4.39	10.54	2.40091
EAF2	ENSG00000145088.8	protein_coding	1.48	3.54	2.39189
MILR1	ENSG00000271605.5	protein_coding	2.48	5.83	2.35081
LETM2	ENSG00000165046.12	protein_coding	17.71	41.63	2.35065
TFPI2	ENSG00000105825.11	protein_coding	6.79	15.95	2.34904
CCDC163P	ENSG00000280670.2	protein_coding	1.88	4.41	2.34574
INO80B-WBP1	ENSG00000274049.4	protein_coding	1.92	4.49	2.33854
ARHGAP19	ENSG00000213390.10	protein_coding	3.91	9.14	2.3376
RAB4B-EGLN2	ENSG00000171570.10	protein_coding	1.24	2.89	2.33065
CTD-2021K4.1	ENSG00000283228.1	protein_coding	5.77	13.38	2.31889
ZNF222	ENSG00000159885.13	protein_coding	3.17	7.35	2.31861
ACVRL1	ENSG00000139567.12	protein_coding	1.26	2.91	2.30952
LA16c-306E5.2	ENSG00000262621.4	protein_coding	1.09	2.51	2.30275
MPP4	ENSG00000082126.17	protein_coding	2.7	6.18	2.28889
ZNF124	ENSG00000196418.12	protein_coding	5.74	13.11	2.28397
HMGN5	ENSG00000198157.10	protein_coding	10.08	23	2.28175
MFSD2A	ENSG00000168389.17	protein_coding	1.8	4.1	2.27778
ST3GAL6	ENSG00000064225.12	protein_coding	1.89	4.3	2.27513
LEF1	ENSG00000138795.9	protein_coding	2.81	6.38	2.27046
CDKL1	ENSG00000100490.9	protein_coding	15.05	34.12	2.26711
U2AF1L4	ENSG00000161265.14	protein_coding	6.17	13.92	2.25608
ZNF551	ENSG00000204519.10	protein_coding	1.87	4.19	2.24064
C4orf26	ENSG00000174792.10	protein_coding	2.62	5.82	2.22137
CH507-9B2.9	ENSG00000280433.1	protein_coding	1.74	3.84	2.2069
PEX5L	ENSG00000114757.18	protein_coding	2.7	5.95	2.2037
ZHX3	ENSG00000174306.21	protein_coding	18.1	39.71	2.19392
C4orf47	ENSG00000205129.8	protein_coding	1.05	2.28	2.17143
EXOSC3	ENSG00000107371.12	protein_coding	18.53	40.13	2.16568
ZNF708	ENSG00000182141.10	protein_coding	1.66	3.59	2.16265
SS18L2	ENSG00000008324.10	protein_coding	11.37	24.58	2.16183
FAM43A	ENSG00000185112.5	protein_coding	1.54	3.31	2.14935
ARL6	ENSG00000113966.9	protein_coding	2.01	4.32	2.14925
RP11-244H3.4	ENSG00000271741.1	protein_coding	1.37	2.93	2.13869
PCGF6	ENSG00000156374.14	protein_coding	2.25	4.79	2.12889
FLRT2	ENSG00000185070.10	protein_coding	1.5	3.19	2.12667
ZNF92	ENSG00000146757.13	protein_coding	2.6	5.52	2.12308
RASGRP3	ENSG00000152689.17	protein_coding	1.34	2.83	2.11194
ZNF331	ENSG00000130844.16	protein_coding	1.1	2.32	2.10909
SLC1A3	ENSG00000079215.13	protein_coding	2.17	4.57	2.10599
TLR3	ENSG00000164342.12	protein_coding	1.26	2.64	2.09524
FKBP5	ENSG00000096060.14	protein_coding	11.06	23.09	2.0877
NAA15	ENSG00000164134.12	protein_coding	17.07	35.62	2.0867
HIBCH	ENSG00000198130.15	protein_coding	4.89	10.2	2.08589
LIN9	ENSG00000183814.15	protein_coding	3.72	7.75	2.08333
LHX1	ENSG00000273706.4	protein_coding	8.39	17.42	2.07628
DYNC2H1	ENSG00000187240.13	protein_coding	3.93	8.14	2.07125
YY2	ENSG00000230797.2	protein_coding	3.03	6.25	2.06271
SAA1	ENSG00000173432.10	protein_coding	32.6	67.14	2.05951
IL7R	ENSG00000168685.14	protein_coding	4.59	9.44	2.05664
RPS6KA5	ENSG00000100784.10	protein_coding	7.36	15.12	2.05435
GNRH1	ENSG00000147437.9	protein_coding	1.49	3.06	2.05369
IL15RA	ENSG00000134470.20	protein_coding	2.01	4.12	2.04975
MB21D1	ENSG00000164430.15	protein_coding	6.36	13	2.04403
SCML2	ENSG00000102098.17	protein_coding	3.04	6.21	2.04276
MTBP	ENSG00000172167.7	protein_coding	3.96	8.08	2.0404
CDC7	ENSG00000097046.12	protein_coding	2.8	5.71	2.03929
LRRIQ1	ENSG00000133640.18	protein_coding	1.84	3.75	2.03804
TMEM156	ENSG00000121895.7	protein_coding	5.33	10.86	2.03752
FAAP24	ENSG00000131944.9	protein_coding	4.71	9.58	2.03397
CLEC2D	ENSG00000069493.14	protein_coding	1.63	3.31	2.03067
HARBI1	ENSG00000180423.4	protein_coding	1.12	2.27	2.02679
SLC25A33	ENSG00000171612.6	protein_coding	2.79	5.61	2.01075
DDIAS	ENSG00000165490.12	protein_coding	3.7	7.43	2.00811
CCDC125	ENSG00000183323.12	protein_coding	4.14	8.29	2.00242
RP11-166B2.1	ENSG00000234719.8	protein_coding	1.96	3.91	1.9949
PCBD2	ENSG00000132570.14	protein_coding	1.64	3.27	1.9939
DDX60L	ENSG00000181381.13	protein_coding	4.33	8.63	1.99307
SMAD6	ENSG00000137834.14	protein_coding	1.34	2.67	1.99254
GSG2	ENSG00000177602.5	protein_coding	2.57	5.12	1.99222
FKTN	ENSG00000106692.13	protein_coding	7.68	15.3	1.99219
HAS3	ENSG00000103044.10	protein_coding	2.37	4.71	1.98734
SFXN2	ENSG00000156398.12	protein_coding	4.29	8.52	1.98601
F12	ENSG00000131187.9	protein_coding	1.95	3.87	1.98462
WDR75	ENSG00000115368.9	protein_coding	23.65	46.82	1.9797
CDC6	ENSG00000094804.9	protein_coding	22.93	45.32	1.97645
SKA3	ENSG00000165480.15	protein_coding	14.44	28.4	1.96676
FMO4	ENSG00000076258.9	protein_coding	2.27	4.46	1.96476
ASAH2B	ENSG00000204147.9	protein_coding	2.16	4.24	1.96296
GALNT1	ENSG00000141429.13	protein_coding	30.58	59.59	1.94866
LRTOMT	ENSG00000184154.13	protein_coding	3.67	7.15	1.94823
RP11-286N22.8	ENSG00000256591.5	protein_coding	19.47	37.88	1.94556
CTGF	ENSG00000118523.5	protein_coding	71.55	139.1	1.9441
ZNF555	ENSG00000186300.11	protein_coding	2.46	4.78	1.94309
FOSB	ENSG00000125740.13	protein_coding	1.87	3.62	1.93583
NDUFAF6	ENSG00000156170.12	protein_coding	8.32	16.06	1.93029
FAM98A	ENSG00000119812.18	protein_coding	54.6	105.13	1.92546
GLMN	ENSG00000174842.16	protein_coding	4.07	7.83	1.92383
USP28	ENSG00000048028.11	protein_coding	13.04	25.07	1.92255
ARMC1	ENSG00000104442.9	protein_coding	13.84	26.58	1.92052
PEX2	ENSG00000164751.14	protein_coding	15.21	29.2	1.91979
TRMT12	ENSG00000183665.5	protein_coding	1.61	3.09	1.91925
TMEM199	ENSG00000244045.11	protein_coding	6.64	12.74	1.91867
CENPP	ENSG00000188312.13	protein_coding	2.68	5.14	1.91791
TMEM138	ENSG00000149483.11	protein_coding	14.03	26.89	1.91661
TMEM121	ENSG00000184986.10	protein_coding	2.01	3.85	1.91542
HMGA1	ENSG00000137309.19	protein_coding	415.34	795.17	1.9145
KCTD4	ENSG00000180332.6	protein_coding	3.39	6.49	1.91445
WDR76	ENSG00000092470.11	protein_coding	8.45	16.16	1.91243
FAM111B	ENSG00000189057.10	protein_coding	7.61	14.55	1.91196
LCN2	ENSG00000148346.11	protein_coding	2.33	4.45	1.90987
TFAP4	ENSG00000090447.11	protein_coding	7.72	14.74	1.90933
KRT7	ENSG00000135480.14	protein_coding	8.81	16.82	1.90919
WEE1	ENSG00000166483.10	protein_coding	21.69	41.26	1.90226
CAMK4	ENSG00000152495.10	protein_coding	2.55	4.85	1.90196
RP11-80H18.3	ENSG00000255154.7	protein_coding	3.32	6.31	1.9006
PHOSPHO2	ENSG00000144362.11	protein_coding	3	5.7	1.9
LONRF1	ENSG00000154359.12	protein_coding	2.16	4.1	1.89815
DUSP5	ENSG00000138166.5	protein_coding	3.13	5.94	1.89776
SLC26A2	ENSG00000155850.7	protein_coding	4.36	8.27	1.89679
COL1A1	ENSG00000108821.13	protein_coding	1.06	2.01	1.89623
MCM10	ENSG00000065328.16	protein_coding	4.42	8.38	1.89593
CENPQ	ENSG00000031691.6	protein_coding	10.1	19.13	1.89406
CBR3	ENSG00000159231.5	protein_coding	3.38	6.4	1.89349
ZNF597	ENSG00000167981.5	protein_coding	1.76	3.33	1.89205
LRP8	ENSG00000157193.15	protein_coding	7.86	14.86	1.89059
NEK7	ENSG00000151414.14	protein_coding	48.38	91.42	1.88962
HOXC9	ENSG00000180806.4	protein_coding	2.75	5.19	1.88727
FAM179B	ENSG00000198718.12	protein_coding	3.23	6.09	1.88545
GCFC2	ENSG00000005436.13	protein_coding	4.83	9.1	1.88406
DKK1	ENSG00000107984.9	protein_coding	95.46	179.82	1.88372
SVIP	ENSG00000198168.8	protein_coding	7.96	14.98	1.88191
C5orf30	ENSG00000181751.9	protein_coding	4.53	8.52	1.88079
ZNF724P	ENSG00000196081.9	protein_coding	2.4	4.51	1.87917
ZFP69B	ENSG00000187801.14	protein_coding	1.57	2.95	1.87898
DPH6	ENSG00000134146.11	protein_coding	3.02	5.67	1.87748
DEPTOR	ENSG00000155792.9	protein_coding	4.38	8.22	1.87671
SMIM4	ENSG00000168273.7	protein_coding	16.74	31.37	1.87395
FER	ENSG00000151422.12	protein_coding	3.96	7.42	1.87374
WDR66	ENSG00000158023.9	protein_coding	7	13.1	1.87143
ZNF680	ENSG00000173041.11	protein_coding	4.13	7.72	1.86925
ZNF786	ENSG00000197362.14	protein_coding	1.64	3.06	1.86585
TBC1D32	ENSG00000146350.13	protein_coding	2.55	4.75	1.86275
RAD54B	ENSG00000197275.13	protein_coding	5.06	9.42	1.86166
ZNF512	ENSG00000243943.9	protein_coding	15	27.92	1.86133
KLF2	ENSG00000127528.5	protein_coding	2.44	4.53	1.85656
ODC1	ENSG00000115758.12	protein_coding	49.56	91.98	1.85593
ZNF788	ENSG00000214189.8	protein_coding	3.05	5.65	1.85246
HOXA1	ENSG00000105991.7	protein_coding	1.93	3.57	1.84974
NCAPG	ENSG00000109805.9	protein_coding	27.06	49.99	1.84738
TOR3A	ENSG00000186283.13	protein_coding	9.83	18.15	1.84639
POLR3D	ENSG00000168495.12	protein_coding	5.68	10.46	1.84155
CNRIP1	ENSG00000119865.8	protein_coding	5.93	10.9	1.83811
FOS	ENSG00000170345.9	protein_coding	1.05	1.93	1.8381
CBX8	ENSG00000141570.10	protein_coding	3.81	6.99	1.83465
COA7	ENSG00000162377.5	protein_coding	10.32	18.93	1.8343
FST	ENSG00000134363.11	protein_coding	2.77	5.08	1.83394
DDAH1	ENSG00000153904.18	protein_coding	24.83	45.43	1.82964
SIGLEC15	ENSG00000197046.11	protein_coding	30.73	56.2	1.82883
ETV4	ENSG00000175832.12	protein_coding	9.9	18.09	1.82727
SWT1	ENSG00000116668.12	protein_coding	1.21	2.21	1.82645
LTBP2	ENSG00000119681.11	protein_coding	2.35	4.29	1.82553
CEP295	ENSG00000166004.14	protein_coding	6.51	11.88	1.82488
BARD1	ENSG00000138376.10	protein_coding	4.91	8.96	1.82485
ST3GAL5	ENSG00000115525.16	protein_coding	1.57	2.86	1.82166
ME3	ENSG00000151376.16	protein_coding	4.35	7.91	1.81839
WDR17	ENSG00000150627.15	protein_coding	1.09	1.98	1.81651
ZNF718	ENSG00000250312.6	protein_coding	3.08	5.59	1.81494
TLR6	ENSG00000174130.12	protein_coding	1.08	1.96	1.81481
GTF2E1	ENSG00000153767.9	protein_coding	7.46	13.53	1.81367
GOLGA8R	ENSG00000186399.10	protein_coding	1.01	1.83	1.81188
ELOVL2	ENSG00000197977.3	protein_coding	8.09	14.63	1.80841
PER1	ENSG00000179094.14	protein_coding	3.02	5.46	1.80795
C3orf33	ENSG00000174928.15	protein_coding	1.74	3.14	1.8046
ASRGL1	ENSG00000162174.12	protein_coding	4.24	7.65	1.80425
C15orf40	ENSG00000169609.13	protein_coding	7.29	13.15	1.80384
BBS4	ENSG00000140463.13	protein_coding	4.63	8.35	1.80346
GPATCH2	ENSG00000092978.10	protein_coding	7.03	12.66	1.80085
ONECUT2	ENSG00000119547.5	protein_coding	1.5	2.7	1.8
EPCAM	ENSG00000119888.10	protein_coding	3.25	5.85	1.8
UPK3B	ENSG00000243566.6	protein_coding	2.09	3.76	1.79904
ALDH5A1	ENSG00000112294.12	protein_coding	2.38	4.28	1.79832
TBC1D4	ENSG00000136111.12	protein_coding	6.62	11.88	1.79456
ACBD7	ENSG00000176244.6	protein_coding	2.53	4.54	1.79447
POLR3G	ENSG00000113356.11	protein_coding	1.89	3.39	1.79365
BIRC3	ENSG00000023445.13	protein_coding	9.42	16.89	1.79299
TOR1B	ENSG00000136816.15	protein_coding	8.33	14.92	1.79112
PARD6G	ENSG00000178184.15	protein_coding	1.53	2.74	1.79085
DHRS13	ENSG00000167536.13	protein_coding	3.47	6.21	1.78963
GPATCH4	ENSG00000160818.16	protein_coding	15.59	27.86	1.78704
C9orf72	ENSG00000147894.14	protein_coding	1.49	2.66	1.78523
TERF2	ENSG00000132604.10	protein_coding	8.34	14.88	1.78417
SNAP25	ENSG00000132639.12	protein_coding	1.57	2.8	1.78344
RSC1A1	ENSG00000215695.1	protein_coding	1.3	2.31	1.77692
ZNF227	ENSG00000131115.15	protein_coding	5.9	10.47	1.77458
FOXRED2	ENSG00000100350.14	protein_coding	9.53	16.9	1.77335
SPDL1	ENSG00000040275.16	protein_coding	43.48	77.05	1.77208
C8orf44-SGK3	ENSG00000270024.5	protein_coding	1.49	2.64	1.77181
CXCL8	ENSG00000169429.10	protein_coding	39.9	70.63	1.77018
TEFM	ENSG00000172171.10	protein_coding	7.04	12.46	1.76989
TMEM38B	ENSG00000095209.11	protein_coding	6.56	11.6	1.76829
STK33	ENSG00000130413.15	protein_coding	4.09	7.23	1.76773
POMK	ENSG00000185900.9	protein_coding	1.24	2.19	1.76613
ZNF431	ENSG00000196705.8	protein_coding	4.73	8.35	1.76533
ATF7IP2	ENSG00000166669.13	protein_coding	4.13	7.29	1.76513
TAGLN	ENSG00000149591.16	protein_coding	7.46	13.15	1.76273
RTKN2	ENSG00000182010.10	protein_coding	1.51	2.66	1.76159
CLIC3	ENSG00000169583.12	protein_coding	1.58	2.78	1.75949
ALKBH8	ENSG00000137760.14	protein_coding	2.86	5.03	1.75874
TEC	ENSG00000135605.12	protein_coding	4.13	7.26	1.75787
LSG1	ENSG00000041802.10	protein_coding	15.17	26.64	1.7561
PTCH1	ENSG00000185920.15	protein_coding	3.76	6.6	1.75532
CSF2	ENSG00000164400.5	protein_coding	3.94	6.91	1.75381
ASTE1	ENSG00000034533.11	protein_coding	2.34	4.1	1.75214
SENP1	ENSG00000079387.13	protein_coding	7.24	12.67	1.75
TIGD7	ENSG00000140993.10	protein_coding	5.25	9.18	1.74857
MYPN	ENSG00000138347.15	protein_coding	2.54	4.44	1.74803
ZNF93	ENSG00000184635.13	protein_coding	8.85	15.47	1.74802
NARS2	ENSG00000137513.9	protein_coding	12.29	21.47	1.74695
TMCC1	ENSG00000172765.16	protein_coding	40.36	70.45	1.74554
ACTR3B	ENSG00000133627.17	protein_coding	2.12	3.7	1.74528
STIM2	ENSG00000109689.14	protein_coding	4.63	8.08	1.74514
DOCK10	ENSG00000135905.18	protein_coding	1.6	2.79	1.74375
CKLF-CMTM1	ENSG00000254788.7	protein_coding	2.65	4.61	1.73962
RTTN	ENSG00000176225.12	protein_coding	5.72	9.95	1.73951
PNPT1	ENSG00000138035.14	protein_coding	8.1	14.09	1.73951
PFKFB2	ENSG00000123836.14	protein_coding	2.3	4	1.73913
ZNF443	ENSG00000180855.15	protein_coding	2.07	3.6	1.73913
PRKAR2B	ENSG00000005249.12	protein_coding	1.34	2.33	1.73881
HAPLN3	ENSG00000140511.11	protein_coding	3.2	5.56	1.7375
ADAMTS6	ENSG00000049192.14	protein_coding	5.01	8.7	1.73653
C12orf4	ENSG00000047621.11	protein_coding	7.93	13.77	1.73644
LMNB1	ENSG00000113368.11	protein_coding	55.97	97.05	1.73396
STARD4	ENSG00000164211.12	protein_coding	6.45	11.18	1.73333
RAB23	ENSG00000112210.11	protein_coding	7.92	13.72	1.73232
CENPL	ENSG00000120334.15	protein_coding	5.82	10.08	1.73196
BRCA1	ENSG00000012048.20	protein_coding	17.38	30.1	1.73188
CASC5	ENSG00000137812.19	protein_coding	5.58	9.66	1.73118
KAT14	ENSG00000149474.13	protein_coding	3.25	5.62	1.72923
EMSY	ENSG00000158636.16	protein_coding	6.53	11.29	1.72894
VBP1	ENSG00000155959.10	protein_coding	54.82	94.77	1.72875
SLC25A15	ENSG00000102743.14	protein_coding	3.7	6.39	1.72703
PUM3	ENSG00000080608.9	protein_coding	20.99	36.25	1.72701
CTD-2369P2.12	ENSG00000267303.1	protein_coding	6.77	11.69	1.72674
C5orf34	ENSG00000172244.8	protein_coding	6.19	10.68	1.72536
ZBTB2	ENSG00000181472.4	protein_coding	10.5	18.11	1.72476
VRK1	ENSG00000100749.7	protein_coding	10.6	18.28	1.72453
THBD	ENSG00000178726.6	protein_coding	25.35	43.71	1.72426
GPD1L	ENSG00000152642.10	protein_coding	2.6	4.48	1.72308
SLFN13	ENSG00000154760.13	protein_coding	13.17	22.67	1.72134
VEPH1	ENSG00000197415.11	protein_coding	14.46	24.88	1.72061
HTATIP2	ENSG00000109854.13	protein_coding	4.04	6.95	1.7203
MARCKSL1	ENSG00000175130.6	protein_coding	18.49	31.76	1.71769
PBK	ENSG00000168078.9	protein_coding	24.74	42.48	1.71706
RTN4IP1	ENSG00000130347.12	protein_coding	5.61	9.63	1.71658
SETDB2	ENSG00000136169.16	protein_coding	1.58	2.71	1.71519
ZNF107	ENSG00000196247.11	protein_coding	1.89	3.24	1.71429
C12orf45	ENSG00000151131.10	protein_coding	7.2	12.34	1.71389
NCK1	ENSG00000158092.6	protein_coding	24.61	42.13	1.71191
CPED1	ENSG00000106034.17	protein_coding	2.15	3.68	1.71163
MAK16	ENSG00000198042.10	protein_coding	6.9	11.8	1.71014
SPATA33	ENSG00000167523.13	protein_coding	6.39	10.92	1.70892
LDAH	ENSG00000118961.14	protein_coding	10.65	18.19	1.70798
RPL39L	ENSG00000163923.9	protein_coding	6.21	10.6	1.70692
VAMP1	ENSG00000139190.16	protein_coding	2.32	3.96	1.7069
ABHD10	ENSG00000144827.8	protein_coding	20.88	35.63	1.70642
MDM4	ENSG00000198625.12	protein_coding	4.53	7.73	1.7064
ACOT13	ENSG00000112304.10	protein_coding	6.4	10.92	1.70625
NUDCD2	ENSG00000170584.10	protein_coding	4.12	7.02	1.70388
TRMT10C	ENSG00000174173.6	protein_coding	16.47	28.06	1.7037
DBF4	ENSG00000006634.7	protein_coding	20.8	35.43	1.70337
MCPH1	ENSG00000147316.12	protein_coding	2.22	3.78	1.7027
ADAMTS9	ENSG00000163638.13	protein_coding	1.41	2.4	1.70213
PRKCH	ENSG00000027075.13	protein_coding	8.49	14.45	1.702
TCTN1	ENSG00000204852.15	protein_coding	19.01	32.35	1.70174
EXO1	ENSG00000174371.16	protein_coding	23.7	40.32	1.70127
BEND3	ENSG00000178409.13	protein_coding	1.17	1.99	1.70085
RFC4	ENSG00000163918.10	protein_coding	55.84	94.87	1.69896
SOCS4	ENSG00000180008.8	protein_coding	5.6	9.51	1.69821
PIK3R4	ENSG00000196455.7	protein_coding	22.11	37.52	1.69697
NRAS	ENSG00000213281.4	protein_coding	32.34	54.88	1.69697
DYX1C1	ENSG00000256061.7	protein_coding	1.55	2.63	1.69677
FOSL1	ENSG00000175592.8	protein_coding	116.24	197.19	1.6964
MTERF3	ENSG00000156469.8	protein_coding	12.22	20.73	1.6964
KLHL23	ENSG00000213160.9	protein_coding	10.44	17.7	1.6954
ARL15	ENSG00000185305.10	protein_coding	5.71	9.68	1.69527
DNM3	ENSG00000197959.13	protein_coding	2.13	3.61	1.69484
COBLL1	ENSG00000082438.15	protein_coding	8.79	14.88	1.69283
ARHGAP26	ENSG00000145819.15	protein_coding	2.93	4.96	1.69283
TTI2	ENSG00000129696.12	protein_coding	5.55	9.39	1.69189
DEPDC1B	ENSG00000035499.12	protein_coding	5.82	9.83	1.689
MZT1	ENSG00000204899.5	protein_coding	26.07	44.03	1.68891
CPT1A	ENSG00000110090.12	protein_coding	4.21	7.11	1.68884
CTTNBP2	ENSG00000077063.10	protein_coding	1.38	2.33	1.68841
PRIM1	ENSG00000198056.13	protein_coding	10.94	18.46	1.68739
XRCC2	ENSG00000196584.2	protein_coding	3.74	6.31	1.68717
ZNF346	ENSG00000113761.11	protein_coding	4.53	7.64	1.68653
CCDC25	ENSG00000147419.16	protein_coding	16.59	27.95	1.68475
UBE2T	ENSG00000077152.9	protein_coding	54.71	92.1	1.68342
MRPL50	ENSG00000136897.7	protein_coding	3.56	5.99	1.68258
HNF4G	ENSG00000164749.11	protein_coding	3.24	5.45	1.6821
HMMR	ENSG00000072571.19	protein_coding	26.14	43.89	1.67904
ZNF112	ENSG00000062370.16	protein_coding	1.9	3.19	1.67895
DZIP3	ENSG00000198919.12	protein_coding	5.06	8.49	1.67787
PRTG	ENSG00000166450.12	protein_coding	2.42	4.06	1.67769
WDYHV1	ENSG00000156795.6	protein_coding	17.05	28.58	1.67625
FAM114A2	ENSG00000055147.18	protein_coding	8.17	13.68	1.67442
URB2	ENSG00000135763.9	protein_coding	4.32	7.23	1.67361
IL1B	ENSG00000125538.11	protein_coding	2.12	3.54	1.66981
SLC35B4	ENSG00000205060.10	protein_coding	6.31	10.53	1.66878
ACAD11	ENSG00000240303.7	protein_coding	10.14	16.91	1.66765
LYAR	ENSG00000145220.13	protein_coding	23.74	39.59	1.66765
DSCC1	ENSG00000136982.5	protein_coding	4.89	8.15	1.66667
E2F8	ENSG00000129173.12	protein_coding	3.29	5.48	1.66565
ZNF90	ENSG00000213988.9	protein_coding	2.87	4.78	1.66551
FBXO45	ENSG00000174013.7	protein_coding	8.19	13.63	1.66422
ERCC6L	ENSG00000186871.6	protein_coding	9.08	15.11	1.6641
ZSWIM7	ENSG00000214941.7	protein_coding	7.68	12.78	1.66406
ASUN	ENSG00000064102.14	protein_coding	24.09	40.07	1.66335
IL17D	ENSG00000172458.4	protein_coding	1.51	2.51	1.66225
SMIM13	ENSG00000224531.5	protein_coding	6.12	10.17	1.66176
ZNF714	ENSG00000160352.15	protein_coding	8.72	14.49	1.6617
FOXA1	ENSG00000129514.5	protein_coding	2.48	4.12	1.66129
TFAM	ENSG00000108064.10	protein_coding	40.07	66.53	1.66034
USP1	ENSG00000162607.12	protein_coding	45.46	75.45	1.6597
KCNQ5	ENSG00000185760.15	protein_coding	2.96	4.91	1.65878
TOPBP1	ENSG00000163781.12	protein_coding	26.13	43.34	1.65863
CLCN4	ENSG00000073464.11	protein_coding	5.1	8.44	1.6549
MCEE	ENSG00000124370.10	protein_coding	5.75	9.51	1.65391
TTC31	ENSG00000115282.19	protein_coding	6.78	11.21	1.65339
CRY1	ENSG00000008405.11	protein_coding	13.61	22.5	1.6532
BHLHE41	ENSG00000123095.5	protein_coding	9.59	15.85	1.65276
ZNF521	ENSG00000198795.10	protein_coding	2.21	3.65	1.65158
CBR4	ENSG00000145439.11	protein_coding	3.53	5.83	1.65156
RBMXL1	ENSG00000213516.9	protein_coding	2.38	3.93	1.65126
PPIF	ENSG00000108179.13	protein_coding	137.23	226.55	1.65088
PTPN22	ENSG00000134242.15	protein_coding	1.4	2.31	1.65
TARBP1	ENSG00000059588.9	protein_coding	10.99	18.13	1.64968
SPRTN	ENSG00000010072.15	protein_coding	5.08	8.38	1.64961
PRIMPOL	ENSG00000164306.10	protein_coding	6.56	10.82	1.64939
ZCWPW1	ENSG00000078487.17	protein_coding	1.85	3.05	1.64865
TNFRSF6B	ENSG00000243509.4	protein_coding	111.47	183.66	1.64762
IL1RAPL1	ENSG00000169306.9	protein_coding	5.5	9.06	1.64727
SPCS2	ENSG00000118363.11	protein_coding	78.03	128.5	1.6468
ZNF697	ENSG00000143067.4	protein_coding	2.8	4.61	1.64643
ATAD2	ENSG00000156802.12	protein_coding	22.68	37.32	1.6455
AASDHPPT	ENSG00000149313.10	protein_coding	16.97	27.91	1.64467
SCML1	ENSG00000047634.14	protein_coding	13.62	22.4	1.64464
CDC27	ENSG00000004897.11	protein_coding	55.79	91.75	1.64456
BLM	ENSG00000197299.10	protein_coding	4.07	6.69	1.64373
DNA2	ENSG00000138346.14	protein_coding	6.47	10.62	1.64142
APOO	ENSG00000184831.13	protein_coding	28.94	47.43	1.63891
KAAG1	ENSG00000146049.1	protein_coding	1.19	1.95	1.63866
FAXC	ENSG00000146267.11	protein_coding	6.47	10.6	1.63833
OSBPL8	ENSG00000091039.16	protein_coding	24.74	40.52	1.63783
HERC5	ENSG00000138646.8	protein_coding	9.38	15.36	1.63753
CPSF2	ENSG00000165934.12	protein_coding	16.74	27.39	1.6362
ZBTB8OS	ENSG00000176261.15	protein_coding	34.19	55.93	1.63586
SSX2IP	ENSG00000117155.16	protein_coding	12.38	20.25	1.6357
SGO2	ENSG00000163535.17	protein_coding	15.29	25	1.63506
ARHGAP42	ENSG00000165895.17	protein_coding	1.04	1.7	1.63462
LEO1	ENSG00000166477.12	protein_coding	10.78	17.62	1.63451
C22orf39	ENSG00000242259.8	protein_coding	8.97	14.66	1.63434
CNOT9	ENSG00000144580.13	protein_coding	29.9	48.85	1.63378
RRS1	ENSG00000179041.3	protein_coding	12.56	20.51	1.63296
GABPB2	ENSG00000143458.11	protein_coding	2.67	4.36	1.63296
FAM169A	ENSG00000198780.11	protein_coding	1.05	1.71	1.62857
SPC25	ENSG00000152253.8	protein_coding	15.01	24.44	1.62825
ZNF486	ENSG00000256229.7	protein_coding	6.75	10.99	1.62815
FAM167A	ENSG00000154319.14	protein_coding	3.17	5.16	1.62776
SCLT1	ENSG00000151466.11	protein_coding	6.04	9.83	1.62748
XPNPEP3	ENSG00000196236.12	protein_coding	6.12	9.96	1.62745
SURF2	ENSG00000148291.9	protein_coding	9.36	15.23	1.62714
ZRANB3	ENSG00000121988.17	protein_coding	7.58	12.33	1.62665
THUMPD2	ENSG00000138050.14	protein_coding	9.6	15.61	1.62604
UMAD1	ENSG00000219545.10	protein_coding	4.98	8.09	1.6245
FHIT	ENSG00000189283.9	protein_coding	1.43	2.32	1.62238
KMT5A	ENSG00000183955.12	protein_coding	48.56	78.78	1.62232
NIPAL1	ENSG00000163293.11	protein_coding	2.46	3.99	1.62195
PINLYP	ENSG00000234465.10	protein_coding	2.59	4.2	1.62162
CADPS2	ENSG00000081803.15	protein_coding	4.69	7.6	1.62047
WDR12	ENSG00000138442.9	protein_coding	22.42	36.3	1.61909
ZBED2	ENSG00000177494.5	protein_coding	2.2	3.56	1.61818
RIDA	ENSG00000132541.10	protein_coding	13.11	21.2	1.61709
ARHGEF39	ENSG00000137135.17	protein_coding	4.02	6.5	1.61692
GRPEL2	ENSG00000164284.14	protein_coding	8.02	12.96	1.61596
PAX6	ENSG00000007372.20	protein_coding	12.31	19.89	1.61576
LTV1	ENSG00000135521.8	protein_coding	20.96	33.85	1.61498
PTX3	ENSG00000163661.3	protein_coding	15.92	25.71	1.61495
SNAPC1	ENSG00000023608.4	protein_coding	40.31	65.09	1.61474
LIN52	ENSG00000205659.10	protein_coding	2.88	4.65	1.61458
ORC1	ENSG00000085840.12	protein_coding	6.95	11.22	1.61439
GCAT	ENSG00000100116.16	protein_coding	7.44	12.01	1.61425
ACAP2	ENSG00000114331.13	protein_coding	14.03	22.64	1.61368
PDE7A	ENSG00000205268.10	protein_coding	3.96	6.39	1.61364
USP6NL	ENSG00000148429.14	protein_coding	6.1	9.84	1.61311
GTPBP10	ENSG00000105793.15	protein_coding	14.45	23.3	1.61246
ZNF649	ENSG00000198093.10	protein_coding	1.26	2.03	1.61111
AMMECR1	ENSG00000101935.9	protein_coding	10.35	16.67	1.61063
KIAA1524	ENSG00000163507.13	protein_coding	19.23	30.97	1.6105
LMNB2	ENSG00000176619.11	protein_coding	94.88	152.46	1.60687
ANKRD1	ENSG00000148677.6	protein_coding	174.38	280.13	1.60643
PHF5A	ENSG00000100410.7	protein_coding	30.73	49.31	1.60462
ALG8	ENSG00000159063.12	protein_coding	20.56	32.99	1.60457
CLSPN	ENSG00000092853.13	protein_coding	12.94	20.76	1.60433
UTP15	ENSG00000164338.9	protein_coding	5.25	8.42	1.60381
MUTYH	ENSG00000132781.17	protein_coding	7.77	12.46	1.6036
HPF1	ENSG00000056050.6	protein_coding	22.79	36.54	1.60333
AC013264.1	ENSG00000283224.1	protein_coding	1.26	2.02	1.60317
TMPO	ENSG00000120802.13	protein_coding	112.33	180	1.60242
PM20D2	ENSG00000146281.5	protein_coding	24	38.44	1.60167
ZBTB14	ENSG00000198081.10	protein_coding	4.82	7.72	1.60166
INTS7	ENSG00000143493.12	protein_coding	8.98	14.38	1.60134
GDAP2	ENSG00000196505.10	protein_coding	4.26	6.82	1.60094
ELK3	ENSG00000111145.7	protein_coding	41.97	67.18	1.60067
ZNF253	ENSG00000256771.2	protein_coding	3.48	5.57	1.60057
EIF4EBP2	ENSG00000148730.6	protein_coding	16.5	26.39	1.59939
NSMCE4A	ENSG00000107672.14	protein_coding	9.76	15.61	1.59939
ABCE1	ENSG00000164163.10	protein_coding	31.08	49.7	1.5991
MNS1	ENSG00000138587.5	protein_coding	3.99	6.38	1.599
IRAK1BP1	ENSG00000146243.13	protein_coding	1.67	2.67	1.5988
KIF15	ENSG00000163808.16	protein_coding	7.8	12.47	1.59872
PSG1	ENSG00000231924.9	protein_coding	11.52	18.41	1.59809
CDC45	ENSG00000093009.9	protein_coding	15.42	24.64	1.59792
FRMD6	ENSG00000139926.15	protein_coding	66.14	105.66	1.59752
BRI3BP	ENSG00000184992.10	protein_coding	12.01	19.18	1.597
ADAT2	ENSG00000189007.15	protein_coding	3.42	5.46	1.59649
ATAD5	ENSG00000176208.8	protein_coding	2.65	4.23	1.59623
MED31	ENSG00000108590.10	protein_coding	15.45	24.66	1.59612
CCZ1	ENSG00000122674.11	protein_coding	11.06	17.65	1.59584
E2F2	ENSG00000007968.6	protein_coding	1.68	2.68	1.59524
TRDMT1	ENSG00000107614.21	protein_coding	3.75	5.98	1.59467
CNTNAP3	ENSG00000106714.17	protein_coding	1.11	1.77	1.59459
ZNF101	ENSG00000181896.11	protein_coding	4.72	7.52	1.59322
SPIN4	ENSG00000186767.6	protein_coding	5.79	9.22	1.5924
NEMP1	ENSG00000166881.9	protein_coding	13.35	21.25	1.59176
RALGPS2	ENSG00000116191.17	protein_coding	27.36	43.54	1.59137
GPN3	ENSG00000111231.8	protein_coding	25.79	40.98	1.58899
IFT46	ENSG00000118096.7	protein_coding	5.98	9.5	1.58863
PLEKHG2	ENSG00000090924.14	protein_coding	13.55	21.51	1.58745
ZNF43	ENSG00000198521.11	protein_coding	5.67	9	1.5873
ATP1B3	ENSG00000069849.10	protein_coding	54.91	87.15	1.58714
PPIL1	ENSG00000137168.7	protein_coding	20.28	32.18	1.58679
INTS10	ENSG00000104613.11	protein_coding	22.2	35.21	1.58604
DPYSL3	ENSG00000113657.12	protein_coding	47.09	74.64	1.58505
PRSS12	ENSG00000164099.3	protein_coding	4.31	6.83	1.58469
EFCAB7	ENSG00000203965.12	protein_coding	3.61	5.72	1.58449
DNAJB11	ENSG00000090520.11	protein_coding	34.27	54.3	1.58448
ANP32E	ENSG00000143401.14	protein_coding	38.26	60.61	1.58416
SKA1	ENSG00000154839.9	protein_coding	6.48	10.26	1.58333
ZDHHC2	ENSG00000104219.12	protein_coding	7.55	11.95	1.58278
GALNT13	ENSG00000144278.14	protein_coding	3.57	5.65	1.58263
PDCD7	ENSG00000090470.14	protein_coding	12.85	20.32	1.58132
DUSP6	ENSG00000139318.7	protein_coding	13.68	21.63	1.58114
C10orf2	ENSG00000107815.7	protein_coding	7.78	12.3	1.58098
ZNF519	ENSG00000175322.11	protein_coding	2.72	4.3	1.58088
TAF8	ENSG00000137413.15	protein_coding	5.01	7.92	1.58084
FAM210A	ENSG00000177150.12	protein_coding	18.77	29.66	1.58018
C16orf59	ENSG00000162062.14	protein_coding	6.88	10.87	1.57994
FAM217B	ENSG00000196227.10	protein_coding	5.83	9.21	1.57976
MTPAP	ENSG00000107951.13	protein_coding	4.49	7.09	1.57906
MRE11A	ENSG00000020922.12	protein_coding	8.94	14.11	1.5783
WDHD1	ENSG00000198554.11	protein_coding	8.32	13.13	1.57812
PUS7L	ENSG00000129317.14	protein_coding	5.21	8.22	1.57774
DCK	ENSG00000156136.9	protein_coding	20.84	32.88	1.57774
CHAF1A	ENSG00000167670.15	protein_coding	29.16	46	1.5775
PDP2	ENSG00000172840.6	protein_coding	4.94	7.79	1.57692
SNX13	ENSG00000071189.21	protein_coding	8.41	13.26	1.57669
RNF114	ENSG00000124226.10	protein_coding	50.17	79.09	1.57644
DROSHA	ENSG00000113360.16	protein_coding	45.9	72.35	1.57625
RFC3	ENSG00000133119.12	protein_coding	11.76	18.53	1.57568
NAT10	ENSG00000135372.8	protein_coding	20.09	31.65	1.57541
ZNF670	ENSG00000277462.1	protein_coding	5.39	8.49	1.57514
SMC2	ENSG00000136824.18	protein_coding	19.64	30.91	1.57383
FGF5	ENSG00000138675.16	protein_coding	90.26	142	1.57323
METTL21A	ENSG00000144401.14	protein_coding	25.72	40.46	1.57309
CENPH	ENSG00000153044.9	protein_coding	18.17	28.57	1.57237
LSM8	ENSG00000128534.7	protein_coding	23.62	37.13	1.57197
ORC5	ENSG00000164815.10	protein_coding	12.14	19.08	1.57166
EPB41L4B	ENSG00000095203.14	protein_coding	6.51	10.23	1.57143
PRRG4	ENSG00000135378.3	protein_coding	1.61	2.53	1.57143
ANKRD54	ENSG00000100124.13	protein_coding	7.67	12.05	1.57106
C3orf38	ENSG00000179021.9	protein_coding	7.39	11.61	1.57104
C21orf91	ENSG00000154642.10	protein_coding	2.63	4.13	1.57034
PLAT	ENSG00000104368.17	protein_coding	19.8	31.09	1.5702
UCHL5	ENSG00000116750.13	protein_coding	37.76	59.29	1.57018
RP11-644F5.10	ENSG00000258311.5	protein_coding	1.14	1.79	1.57018
TRIM59	ENSG00000213186.7	protein_coding	36.5	57.31	1.57014
SERPINB8	ENSG00000166401.14	protein_coding	8.34	13.09	1.56954
ADI1	ENSG00000182551.13	protein_coding	16.04	25.17	1.5692
METTL14	ENSG00000145388.14	protein_coding	11.64	18.25	1.56787
PRDM5	ENSG00000138738.10	protein_coding	1.34	2.1	1.56716
POLA1	ENSG00000101868.10	protein_coding	15.73	24.65	1.56707
ZIC2	ENSG00000043355.11	protein_coding	7.68	12.03	1.56641
RP11-467J12.4	ENSG00000277639.2	protein_coding	1.13	1.77	1.56637
PPP2R3C	ENSG00000092020.10	protein_coding	7.79	12.2	1.56611
FBXO5	ENSG00000112029.9	protein_coding	25.55	40.01	1.56595
CACYBP	ENSG00000116161.17	protein_coding	98.82	154.71	1.56557
MGAT5	ENSG00000152127.8	protein_coding	29.7	46.49	1.56532
CXCL1	ENSG00000163739.4	protein_coding	58.76	91.91	1.56416
NUP58	ENSG00000139496.15	protein_coding	31.68	49.55	1.56408
ZNF12	ENSG00000164631.18	protein_coding	8.78	13.73	1.56378
HMGB3	ENSG00000029993.14	protein_coding	94.22	147.3	1.56336
HYPK	ENSG00000242028.6	protein_coding	2.29	3.58	1.56332
DCAF12L1	ENSG00000198889.4	protein_coding	13.32	20.82	1.56306
FAM122B	ENSG00000156504.16	protein_coding	48.67	76.06	1.56277
C2orf68	ENSG00000168887.10	protein_coding	10.13	15.83	1.56269
FAM72B	ENSG00000188610.12	protein_coding	5.92	9.25	1.5625
WDR3	ENSG00000065183.15	protein_coding	9.34	14.59	1.5621
U2AF1	ENSG00000160201.11	protein_coding	45.9	71.68	1.56166
CHEK1	ENSG00000149554.12	protein_coding	15.84	24.73	1.56124
SEC14L2	ENSG00000100003.17	protein_coding	4.55	7.1	1.56044
RNF219	ENSG00000152193.7	protein_coding	11.4	17.78	1.55965
METTL4	ENSG00000101574.14	protein_coding	5.45	8.5	1.55963
RIOK2	ENSG00000058729.10	protein_coding	8.94	13.93	1.55817
RNGTT	ENSG00000111880.15	protein_coding	9.59	14.94	1.55787
SEH1L	ENSG00000085415.15	protein_coding	22.87	35.62	1.5575
CENPBD1	ENSG00000177946.5	protein_coding	3.13	4.87	1.55591
CYCS	ENSG00000172115.8	protein_coding	43.6	67.83	1.55573
SGO1	ENSG00000129810.14	protein_coding	7.76	12.07	1.55541
XAF1	ENSG00000132530.16	protein_coding	6.32	9.83	1.55538
DGAT2	ENSG00000062282.14	protein_coding	1.01	1.57	1.55446
OXCT1	ENSG00000083720.12	protein_coding	33.38	51.86	1.55362
SPOCD1	ENSG00000134668.12	protein_coding	7.1	11.03	1.55352
PSMG1	ENSG00000183527.11	protein_coding	63.9	99.27	1.55352
ATP9B	ENSG00000166377.19	protein_coding	2.46	3.82	1.55285
DOLPP1	ENSG00000167130.17	protein_coding	5.25	8.15	1.55238
AAGAB	ENSG00000103591.12	protein_coding	17.87	27.73	1.55176
TUBGCP5	ENSG00000275835.4	protein_coding	5.3	8.22	1.55094
SMURF2	ENSG00000108854.15	protein_coding	33.66	52.2	1.5508
ZPR1	ENSG00000109917.10	protein_coding	13.24	20.52	1.54985
VAMP4	ENSG00000117533.14	protein_coding	6.13	9.5	1.54976
RC3H1	ENSG00000135870.11	protein_coding	3.24	5.02	1.54938
MBP	ENSG00000197971.14	protein_coding	6.85	10.61	1.54891
SEMA6B	ENSG00000167680.15	protein_coding	6.91	10.7	1.54848
ZNF594	ENSG00000180626.9	protein_coding	1.79	2.77	1.54749
NOVA1	ENSG00000139910.19	protein_coding	1.83	2.83	1.54645
NDC80	ENSG00000080986.12	protein_coding	17.35	26.83	1.5464
CHRAC1	ENSG00000104472.9	protein_coding	35.19	54.4	1.54589
MBNL3	ENSG00000076770.14	protein_coding	3.6	5.56	1.54444
RPF2	ENSG00000197498.12	protein_coding	27.2	42	1.54412
MRS2	ENSG00000124532.14	protein_coding	19.97	30.82	1.54331
ATE1	ENSG00000107669.17	protein_coding	6.61	10.2	1.54312
POLR1B	ENSG00000125630.15	protein_coding	10.96	16.91	1.54288
ZNF273	ENSG00000198039.11	protein_coding	2.8	4.32	1.54286
SLC12A2	ENSG00000064651.13	protein_coding	5.03	7.76	1.54274
SAAL1	ENSG00000166788.9	protein_coding	7.52	11.6	1.54255
MTFR2	ENSG00000146410.11	protein_coding	13.07	20.16	1.54246
PDIK1L	ENSG00000175087.9	protein_coding	2.84	4.38	1.54225
SNX16	ENSG00000104497.13	protein_coding	7.24	11.16	1.54144
SLC10A7	ENSG00000120519.14	protein_coding	2.31	3.56	1.54113
POLR2K	ENSG00000147669.10	protein_coding	39.15	60.33	1.541
ETF1	ENSG00000120705.12	protein_coding	47.75	73.58	1.54094
CREB5	ENSG00000146592.16	protein_coding	7.03	10.83	1.54054
OIP5	ENSG00000104147.8	protein_coding	10.03	15.45	1.54038
CD177	ENSG00000204936.9	protein_coding	2.26	3.48	1.53982
CSE1L	ENSG00000124207.16	protein_coding	127.07	195.5	1.53852
ZDHHC14	ENSG00000175048.16	protein_coding	5.46	8.4	1.53846
SEC14L1	ENSG00000129657.14	protein_coding	55.78	85.78	1.53783
ATP5S	ENSG00000125375.14	protein_coding	3.82	5.87	1.53665
C4orf46	ENSG00000205208.4	protein_coding	5.63	8.65	1.53641
ABHD17A	ENSG00000129968.15	protein_coding	24.41	37.5	1.53626
ZNF184	ENSG00000096654.15	protein_coding	3.32	5.1	1.53614
SYNJ2	ENSG00000078269.13	protein_coding	9.87	15.16	1.53597
QTRT2	ENSG00000151576.10	protein_coding	12.48	19.16	1.53526
ETV1	ENSG00000006468.13	protein_coding	4.41	6.77	1.53515
ARID3A	ENSG00000116017.10	protein_coding	2.62	4.02	1.53435
NDC1	ENSG00000058804.11	protein_coding	28.74	44.09	1.5341
SYNJ2BP	ENSG00000213463.4	protein_coding	7.49	11.48	1.53271
FIGNL1	ENSG00000132436.11	protein_coding	8.41	12.89	1.5327
ZNF605	ENSG00000196458.10	protein_coding	6.29	9.64	1.53259
CCNE1	ENSG00000105173.13	protein_coding	8.92	13.67	1.53251
HLA-C	ENSG00000204525.15	protein_coding	2.16	3.31	1.53241
SHCBP1	ENSG00000171241.8	protein_coding	15.93	24.41	1.53233
DEK	ENSG00000124795.14	protein_coding	219.74	336.58	1.53172
MRPL19	ENSG00000115364.13	protein_coding	17.89	27.4	1.53158
MOK	ENSG00000080823.21	protein_coding	77.34	118.41	1.53103
GPN1	ENSG00000198522.13	protein_coding	37.3	57.1	1.53083
CRTC3	ENSG00000140577.15	protein_coding	7.11	10.88	1.53024
PTMA	ENSG00000187514.15	protein_coding	1474.26	2255.56	1.52996
NUDCD1	ENSG00000120526.10	protein_coding	19.27	29.46	1.5288
RPP40	ENSG00000124787.13	protein_coding	8.55	13.07	1.52865
PSRC1	ENSG00000134222.16	protein_coding	10.84	16.57	1.5286
LRRC58	ENSG00000163428.3	protein_coding	17.84	27.27	1.52859
MASTL	ENSG00000120539.14	protein_coding	13.23	20.22	1.52834
FASTKD5	ENSG00000215251.3	protein_coding	7.29	11.14	1.52812
THOC1	ENSG00000079134.11	protein_coding	7.39	11.29	1.52774
CENPO	ENSG00000138092.10	protein_coding	17.77	27.14	1.52729
ANO2	ENSG00000047617.14	protein_coding	3.85	5.88	1.52727
ANKRD13B	ENSG00000198720.12	protein_coding	1.67	2.55	1.52695
PTPN4	ENSG00000088179.8	protein_coding	6.89	10.52	1.52685
MSH5	ENSG00000204410.14	protein_coding	15.72	24	1.52672
GORAB	ENSG00000120370.12	protein_coding	5.32	8.12	1.52632
HTATSF1	ENSG00000102241.11	protein_coding	45.55	69.49	1.52558
BCLAF1	ENSG00000029363.15	protein_coding	64.87	98.96	1.52551
C10orf55	ENSG00000222047.8	protein_coding	1.18	1.8	1.52542
ADARB1	ENSG00000197381.15	protein_coding	4.34	6.62	1.52535
ESCO2	ENSG00000171320.14	protein_coding	8.32	12.69	1.52524
MRPL15	ENSG00000137547.8	protein_coding	73.78	112.51	1.52494
PLEKHM3	ENSG00000178385.14	protein_coding	3.41	5.2	1.52493
LCP1	ENSG00000136167.13	protein_coding	3.45	5.26	1.52464
YRDC	ENSG00000196449.3	protein_coding	14.85	22.63	1.52391
RAD51AP1	ENSG00000111247.14	protein_coding	25.47	38.81	1.52375
AP3M2	ENSG00000070718.11	protein_coding	8.69	13.24	1.52359
TAF5	ENSG00000148835.10	protein_coding	2.6	3.96	1.52308
NOP56	ENSG00000101361.15	protein_coding	86.77	132.11	1.52253
SEC61A2	ENSG00000065665.20	protein_coding	5.63	8.57	1.5222
SPARC	ENSG00000113140.10	protein_coding	386.74	588.58	1.5219
DHRS11	ENSG00000278535.4	protein_coding	5.5	8.37	1.52182
CHUK	ENSG00000213341.10	protein_coding	9.5	14.45	1.52105
DICER1	ENSG00000100697.14	protein_coding	7.17	10.9	1.52022
MELK	ENSG00000165304.7	protein_coding	35.13	53.4	1.52007
MCM4	ENSG00000104738.16	protein_coding	58.78	89.32	1.51956
MAT2A	ENSG00000168906.12	protein_coding	218.28	331.69	1.51956
NPM1	ENSG00000181163.13	protein_coding	1368.57	2079.57	1.51952
ABHD17C	ENSG00000136379.11	protein_coding	4.41	6.7	1.51927
RRM1	ENSG00000167325.14	protein_coding	50.63	76.92	1.51926
HMGB2	ENSG00000164104.11	protein_coding	353.99	537.56	1.51857
CASKIN2	ENSG00000177303.9	protein_coding	10.78	16.37	1.51855
ATAD3B	ENSG00000160072.19	protein_coding	18.03	27.37	1.51803
FAM135A	ENSG00000082269.16	protein_coding	7.53	11.43	1.51793
SH3BGRL2	ENSG00000198478.7	protein_coding	3.92	5.95	1.51786
NT5DC2	ENSG00000168268.10	protein_coding	29.58	44.89	1.51758
GNL3L	ENSG00000130119.15	protein_coding	9.34	14.17	1.51713
DCLRE1A	ENSG00000198924.7	protein_coding	5.28	8.01	1.51705
FAM72A	ENSG00000196550.10	protein_coding	9.17	13.91	1.5169
DTWD1	ENSG00000104047.14	protein_coding	14.46	21.93	1.5166
GTF2H3	ENSG00000111358.13	protein_coding	49.85	75.59	1.51635
CDCA7	ENSG00000144354.13	protein_coding	25.23	38.25	1.51605
NT5DC1	ENSG00000178425.13	protein_coding	20.6	31.22	1.51553
TCOF1	ENSG00000070814.17	protein_coding	34.44	52.19	1.51539
UGT8	ENSG00000174607.10	protein_coding	7.8	11.82	1.51538
HEATR3	ENSG00000155393.12	protein_coding	4.62	7	1.51515
KIAA0101	ENSG00000166803.10	protein_coding	103.87	157.34	1.51478
RGPD5	ENSG00000015568.12	protein_coding	7.35	11.13	1.51429
ZNF181	ENSG00000197841.14	protein_coding	5.88	8.9	1.51361
RAD18	ENSG00000070950.9	protein_coding	9.29	14.06	1.51346
BAG2	ENSG00000112208.11	protein_coding	7.58	11.47	1.51319
C17orf96	ENSG00000273604.1	protein_coding	3.45	5.22	1.51304
FSD1L	ENSG00000106701.11	protein_coding	2.34	3.54	1.51282
ZBED8	ENSG00000221886.3	protein_coding	1.21	1.83	1.5124
AMD1	ENSG00000123505.15	protein_coding	42.22	63.85	1.51232
SLCO4A1	ENSG00000101187.15	protein_coding	77.83	117.7	1.51227
RBM45	ENSG00000155636.14	protein_coding	5.02	7.59	1.51195
DNAL1	ENSG00000119661.14	protein_coding	5.12	7.74	1.51172
TBCEL	ENSG00000154114.12	protein_coding	7.31	11.05	1.51163
CFAP97	ENSG00000164323.12	protein_coding	16.46	24.88	1.51154
TMA16	ENSG00000198498.9	protein_coding	17.11	25.86	1.5114
C1D	ENSG00000197223.11	protein_coding	31.22	47.18	1.51121
NKX3-1	ENSG00000167034.9	protein_coding	4.91	7.42	1.5112
CTPS1	ENSG00000171793.13	protein_coding	36.19	54.67	1.51064
CCDC126	ENSG00000169193.11	protein_coding	1.41	2.13	1.51064
DPP8	ENSG00000074603.18	protein_coding	10.58	15.98	1.5104
GPCPD1	ENSG00000125772.12	protein_coding	1.94	2.93	1.51031
TAF13	ENSG00000197780.9	protein_coding	36.17	54.59	1.50926
IFI44	ENSG00000137965.10	protein_coding	14.1	21.28	1.50922
PRPF40A	ENSG00000196504.15	protein_coding	54.71	82.5	1.50795
ARL5B	ENSG00000165997.4	protein_coding	5.79	8.73	1.50777
UBR7	ENSG00000012963.14	protein_coding	9.81	14.79	1.50765
KIF20B	ENSG00000138182.14	protein_coding	21.2	31.96	1.50755
CFAP221	ENSG00000163075.12	protein_coding	2.19	3.3	1.50685
NUP155	ENSG00000113569.15	protein_coding	24.69	37.2	1.50668
NOP58	ENSG00000055044.10	protein_coding	60.08	90.43	1.50516
ARHGAP22	ENSG00000128805.14	protein_coding	10.56	15.89	1.50473
SOX9	ENSG00000125398.5	protein_coding	4.44	6.68	1.5045
ADRB2	ENSG00000169252.5	protein_coding	4.52	6.8	1.50442
FKBP7	ENSG00000079150.17	protein_coding	13.56	20.4	1.50442
NXNL2	ENSG00000130045.15	protein_coding	2.3	3.46	1.50435
MKKS	ENSG00000125863.17	protein_coding	14.25	21.43	1.50386
NVL	ENSG00000143748.17	protein_coding	14.94	22.44	1.50201
PAM16	ENSG00000217930.7	protein_coding	36.34	54.58	1.50193
SKAP2	ENSG00000005020.12	protein_coding	27.36	41.08	1.50146
NALCN	ENSG00000102452.15	protein_coding	4.61	6.92	1.50108
TBXA2R	ENSG00000006638.11	protein_coding	1.96	2.94	1.5
RPP30	ENSG00000148688.13	protein_coding	40.24	60.36	1.5
ZNF669	ENSG00000188295.14	protein_coding	6.68	10.02	1.5
STAMBPL1	ENSG00000138134.11	protein_coding	5.86	8.79	1.5
ARL13B	ENSG00000169379.15	protein_coding	9.52	14.27	1.49895
ISOC1	ENSG00000066583.11	protein_coding	7.66	11.48	1.49869
LIG1	ENSG00000105486.13	protein_coding	48.64	72.87	1.49815
DIAPH3	ENSG00000139734.17	protein_coding	18.34	27.47	1.49782
EXOSC8	ENSG00000120699.12	protein_coding	28.03	41.97	1.49732
ZBTB6	ENSG00000186130.4	protein_coding	3.56	5.33	1.49719
UHMK1	ENSG00000152332.15	protein_coding	22.66	33.92	1.49691
CITED4	ENSG00000179862.6	protein_coding	11.48	17.18	1.49652
FKBP14	ENSG00000106080.10	protein_coding	9.41	14.08	1.49628
SPCS3	ENSG00000129128.12	protein_coding	31.51	47.14	1.49603
ZNF461	ENSG00000197808.11	protein_coding	3.73	5.58	1.49598
SEPSECS	ENSG00000109618.11	protein_coding	2.46	3.68	1.49593
CYB5RL	ENSG00000215883.10	protein_coding	6.07	9.08	1.49588
SMC4	ENSG00000113810.15	protein_coding	91.53	136.9	1.49568
SH2D5	ENSG00000189410.11	protein_coding	9.06	13.55	1.49558
PRKCE	ENSG00000171132.13	protein_coding	16.69	24.96	1.49551
ZNF799	ENSG00000196466.10	protein_coding	2.75	4.11	1.49455
NOL10	ENSG00000115761.15	protein_coding	16.78	25.06	1.49344
CLCN5	ENSG00000171365.15	protein_coding	1.52	2.27	1.49342
DDX20	ENSG00000064703.11	protein_coding	5.25	7.84	1.49333
EZH2	ENSG00000106462.10	protein_coding	19.19	28.65	1.49297
CENPM	ENSG00000100162.14	protein_coding	29.97	44.74	1.49283
SLC25A16	ENSG00000122912.14	protein_coding	8.86	13.22	1.4921
ENO3	ENSG00000108515.17	protein_coding	19.57	29.2	1.49208
PPM1K	ENSG00000163644.14	protein_coding	7.52	11.22	1.49202
AMIGO2	ENSG00000139211.6	protein_coding	168.09	250.78	1.49194
PRPSAP2	ENSG00000141127.14	protein_coding	10.25	15.29	1.49171
CCNA2	ENSG00000145386.9	protein_coding	47.11	70.26	1.4914
ABCF2	ENSG00000033050.7	protein_coding	34.69	51.73	1.49121
BTG3	ENSG00000154640.14	protein_coding	24.37	36.34	1.49118
LIMA1	ENSG00000050405.13	protein_coding	50.22	74.87	1.49084
AIMP2	ENSG00000106305.9	protein_coding	18.92	28.2	1.49049
CYP24A1	ENSG00000019186.9	protein_coding	1.55	2.31	1.49032
FARSB	ENSG00000116120.9	protein_coding	21.15	31.52	1.49031
SRSF1	ENSG00000136450.12	protein_coding	136.13	202.86	1.49019
IQCD	ENSG00000166578.9	protein_coding	1.92	2.86	1.48958
BAZ1A	ENSG00000198604.10	protein_coding	12.75	18.99	1.48941
SLC12A5	ENSG00000124140.13	protein_coding	1.41	2.1	1.48936
ASF1A	ENSG00000111875.7	protein_coding	13.96	20.79	1.48926
TXLNG	ENSG00000086712.12	protein_coding	9.55	14.22	1.48901
WDR92	ENSG00000243667.6	protein_coding	6.68	9.94	1.48802
ZFPM2	ENSG00000169946.13	protein_coding	1.23	1.83	1.4878
RAET1E	ENSG00000164520.11	protein_coding	2.4	3.57	1.4875
ZNF626	ENSG00000188171.15	protein_coding	7.35	10.93	1.48707
GUF1	ENSG00000151806.13	protein_coding	17.19	25.56	1.48691
PUS7	ENSG00000091127.13	protein_coding	16.07	23.89	1.48662
IPP	ENSG00000197429.10	protein_coding	8.92	13.26	1.48655
GEMIN4	ENSG00000179409.10	protein_coding	12.58	18.7	1.48649
AGO2	ENSG00000123908.11	protein_coding	7.38	10.97	1.48645
PCED1B	ENSG00000179715.12	protein_coding	4.92	7.31	1.48577
C5orf22	ENSG00000082213.17	protein_coding	14.39	21.37	1.48506
SCAI	ENSG00000173611.17	protein_coding	1.67	2.48	1.48503
CEP135	ENSG00000174799.10	protein_coding	3.82	5.67	1.48429
ALG14	ENSG00000172339.9	protein_coding	2.21	3.28	1.48416
ULK3	ENSG00000140474.12	protein_coding	5.68	8.43	1.48415
MED21	ENSG00000152944.8	protein_coding	22.77	33.79	1.48397
G3BP1	ENSG00000145907.14	protein_coding	65.69	97.48	1.48394
ANXA8L1	ENSG00000264230.7	protein_coding	1.18	1.75	1.48305
PTRH1	ENSG00000187024.13	protein_coding	8.51	12.62	1.48296
RMI2	ENSG00000175643.8	protein_coding	16.39	24.3	1.48261
STX16-NPEPL1	ENSG00000254995.4	protein_coding	1.39	2.06	1.48201
LIN7C	ENSG00000148943.11	protein_coding	7.12	10.55	1.48174
ZNF37A	ENSG00000075407.18	protein_coding	5.17	7.66	1.48162
MRPL1	ENSG00000169288.17	protein_coding	14.88	22.04	1.48118
RBM27	ENSG00000091009.7	protein_coding	9.48	14.04	1.48101
ZNF143	ENSG00000166478.9	protein_coding	8.35	12.36	1.48024
DDX21	ENSG00000165732.12	protein_coding	69.86	103.4	1.4801
RFESD	ENSG00000175449.13	protein_coding	1	1.48	1.48
CEP78	ENSG00000148019.12	protein_coding	13.16	19.47	1.47948
DPH5	ENSG00000117543.20	protein_coding	24.32	35.98	1.47944
TMEM158	ENSG00000249992.1	protein_coding	9.33	13.79	1.47803
TNNI3K	ENSG00000116783.14	protein_coding	1.13	1.67	1.47788
POLE3	ENSG00000148229.12	protein_coding	35.31	52.17	1.47749
ACP6	ENSG00000162836.11	protein_coding	5.05	7.46	1.47723
DUS4L	ENSG00000105865.10	protein_coding	9.1	13.44	1.47692
TFAP2C	ENSG00000087510.6	protein_coding	3.82	5.64	1.47644
PPIH	ENSG00000171960.10	protein_coding	44.51	65.69	1.47585
MITD1	ENSG00000158411.10	protein_coding	52.11	76.9	1.47572
SSH1	ENSG00000084112.14	protein_coding	16.44	24.26	1.47567
EMG1	ENSG00000126749.14	protein_coding	15.82	23.34	1.47535
KCNK1	ENSG00000135750.14	protein_coding	9.39	13.85	1.47497
CLCN2	ENSG00000114859.15	protein_coding	3.56	5.25	1.47472
TIAM2	ENSG00000146426.17	protein_coding	3.75	5.53	1.47467
ZNF721	ENSG00000182903.15	protein_coding	15.64	23.05	1.47379
ZNF530	ENSG00000183647.10	protein_coding	3	4.42	1.47333
ZNF567	ENSG00000189042.13	protein_coding	3.91	5.76	1.47315
MFSD13A	ENSG00000138111.14	protein_coding	4.46	6.57	1.47309
NCL	ENSG00000115053.15	protein_coding	404.92	596.38	1.47283
STRBP	ENSG00000165209.18	protein_coding	10.66	15.7	1.4728
CACNA2D1	ENSG00000153956.15	protein_coding	10.98	16.17	1.47268
STIL	ENSG00000123473.15	protein_coding	11.57	17.03	1.47191
BRCA2	ENSG00000139618.14	protein_coding	2.84	4.18	1.47183
VKORC1L1	ENSG00000196715.5	protein_coding	14.54	21.4	1.4718
SETD7	ENSG00000145391.13	protein_coding	14.34	21.1	1.47141
GANC	ENSG00000214013.9	protein_coding	4.88	7.18	1.47131
PLGRKT	ENSG00000107020.9	protein_coding	18.76	27.6	1.47122
FAM208B	ENSG00000108021.19	protein_coding	24.42	35.91	1.47052
CENPN	ENSG00000166451.13	protein_coding	19.13	28.13	1.47047
NOL11	ENSG00000130935.9	protein_coding	23.49	34.54	1.47041
IPO11	ENSG00000086200.16	protein_coding	11.63	17.1	1.47034
MCM2	ENSG00000073111.13	protein_coding	50.77	74.64	1.47016
SBNO1	ENSG00000139697.12	protein_coding	19.96	29.34	1.46994
CCT6A	ENSG00000146731.10	protein_coding	145.28	213.36	1.46861
THNSL1	ENSG00000185875.12	protein_coding	3.82	5.61	1.46859
DCAF16	ENSG00000163257.10	protein_coding	13.15	19.31	1.46844
TDP1	ENSG00000042088.13	protein_coding	17.74	26.05	1.46843
GGCT	ENSG00000006625.17	protein_coding	31.04	45.58	1.46843
PNPO	ENSG00000108439.9	protein_coding	25.79	37.87	1.4684
PPAT	ENSG00000128059.8	protein_coding	16.12	23.67	1.46836
ZNF138	ENSG00000197008.9	protein_coding	3.16	4.64	1.46835
ZNF738	ENSG00000172687.13	protein_coding	5.04	7.4	1.46825
RPGR	ENSG00000156313.12	protein_coding	4.38	6.43	1.46804
NAA50	ENSG00000121579.12	protein_coding	157.42	231.09	1.46798
ZNF141	ENSG00000131127.13	protein_coding	4.79	7.03	1.46764
CDKN1C	ENSG00000129757.12	protein_coding	17.88	26.24	1.46756
TWISTNB	ENSG00000105849.5	protein_coding	13.35	19.58	1.46667
SNX5	ENSG00000089006.16	protein_coding	59.08	86.65	1.46666
CBX2	ENSG00000173894.10	protein_coding	2.53	3.71	1.4664
HSPH1	ENSG00000120694.19	protein_coding	48.87	71.62	1.46552
GLE1	ENSG00000119392.14	protein_coding	11	16.12	1.46545
PNO1	ENSG00000115946.7	protein_coding	10.4	15.24	1.46538
THAP12	ENSG00000137492.7	protein_coding	23.63	34.62	1.46509
RWDD4	ENSG00000182552.14	protein_coding	13.64	19.98	1.46481
GNB4	ENSG00000114450.9	protein_coding	15.22	22.29	1.46452
CHD1	ENSG00000153922.10	protein_coding	19.24	28.17	1.46414
WDR35	ENSG00000118965.14	protein_coding	5.24	7.67	1.46374
NIFK	ENSG00000155438.11	protein_coding	57.8	84.59	1.46349
DHFR	ENSG00000228716.6	protein_coding	32.72	47.88	1.46333
HAUS6	ENSG00000147874.10	protein_coding	13.97	20.44	1.46314
ESF1	ENSG00000089048.14	protein_coding	12.29	17.98	1.46298
THAP5	ENSG00000177683.13	protein_coding	17.64	25.79	1.46202
TREX1	ENSG00000213689.10	protein_coding	10.09	14.75	1.46184
BDNF	ENSG00000176697.18	protein_coding	7.54	11.02	1.46154
DIS3	ENSG00000083520.14	protein_coding	16.58	24.23	1.4614
RAB11FIP2	ENSG00000107560.10	protein_coding	6.57	9.6	1.46119
PHLDA2	ENSG00000181649.5	protein_coding	16.37	23.91	1.4606
PKMYT1	ENSG00000127564.16	protein_coding	31.44	45.91	1.46024
CMTR2	ENSG00000180917.17	protein_coding	7.54	11.01	1.46021
WDR5B	ENSG00000196981.3	protein_coding	2.63	3.84	1.46008
GAPVD1	ENSG00000165219.21	protein_coding	12.7	18.54	1.45984
PRIM2	ENSG00000146143.17	protein_coding	11.68	17.05	1.45976
TPX2	ENSG00000088325.15	protein_coding	139.93	204.25	1.45966
ICA1L	ENSG00000163596.16	protein_coding	1.85	2.7	1.45946
NOLC1	ENSG00000166197.16	protein_coding	52.36	76.41	1.45932
OPHN1	ENSG00000079482.12	protein_coding	5.77	8.42	1.45927
PPIL6	ENSG00000185250.15	protein_coding	1.96	2.86	1.45918
OXTR	ENSG00000180914.10	protein_coding	27.75	40.48	1.45874
BCCIP	ENSG00000107949.16	protein_coding	52.56	76.66	1.45852
CABLES1	ENSG00000134508.12	protein_coding	20.93	30.52	1.45819
USP22	ENSG00000124422.11	protein_coding	55.27	80.58	1.45793
ARHGAP32	ENSG00000134909.18	protein_coding	2.97	4.33	1.45791
PDXP	ENSG00000241360.1	protein_coding	7.34	10.7	1.45777
UPP1	ENSG00000183696.13	protein_coding	44.51	64.87	1.45743
GNPNAT1	ENSG00000100522.8	protein_coding	16.18	23.58	1.45735
H2AFZ	ENSG00000164032.11	protein_coding	535.34	780.18	1.45735
MAD2L1	ENSG00000164109.13	protein_coding	42.49	61.92	1.45728
NOC3L	ENSG00000173145.11	protein_coding	27.93	40.69	1.45686
EMC8	ENSG00000131148.8	protein_coding	19.2	27.97	1.45677
B3GALNT2	ENSG00000162885.12	protein_coding	30.8	44.86	1.45649
SLC35E3	ENSG00000175782.9	protein_coding	7.45	10.85	1.45638
CEP126	ENSG00000110318.13	protein_coding	1.47	2.14	1.45578
NUP93	ENSG00000102900.12	protein_coding	28.26	41.12	1.45506
CTD-2116N17.1	ENSG00000259316.9	protein_coding	30.64	44.58	1.45496
SATB2	ENSG00000119042.16	protein_coding	5.21	7.58	1.45489
LRRC8C	ENSG00000171488.14	protein_coding	1.76	2.56	1.45455
CHST10	ENSG00000115526.10	protein_coding	7.79	11.33	1.45443
HSPD1	ENSG00000144381.16	protein_coding	573.04	833.17	1.45395
RBL1	ENSG00000080839.11	protein_coding	8.8	12.79	1.45341
CCDC61	ENSG00000104983.8	protein_coding	4.57	6.64	1.45295
TOP1	ENSG00000198900.5	protein_coding	63.01	91.54	1.45279
EIF4E	ENSG00000151247.12	protein_coding	74.51	108.23	1.45256
ZBTB11	ENSG00000066422.4	protein_coding	9.84	14.29	1.45224
TMEM209	ENSG00000146842.16	protein_coding	10.24	14.87	1.45215
TRPC4	ENSG00000133107.14	protein_coding	9.4	13.65	1.45213
OXNAD1	ENSG00000154814.13	protein_coding	4.69	6.81	1.45203
ZW10	ENSG00000086827.8	protein_coding	9.98	14.49	1.4519
MAPK6	ENSG00000069956.11	protein_coding	18.24	26.48	1.45175
SPC24	ENSG00000161888.11	protein_coding	12.69	18.42	1.45154
ATG4C	ENSG00000125703.14	protein_coding	7.53	10.93	1.45153
BCKDHB	ENSG00000083123.14	protein_coding	9.57	13.89	1.45141
POLD3	ENSG00000077514.8	protein_coding	10.04	14.57	1.4512
MTMR6	ENSG00000139505.11	protein_coding	14.02	20.34	1.45078
GPR19	ENSG00000183150.7	protein_coding	1.62	2.35	1.45062
MSH2	ENSG00000095002.13	protein_coding	40.28	58.42	1.45035
NAF1	ENSG00000145414.8	protein_coding	6.38	9.25	1.44984
SAPCD2	ENSG00000186193.8	protein_coding	11.73	17	1.44928
SLC4A7	ENSG00000033867.16	protein_coding	14.06	20.37	1.44879
EREG	ENSG00000124882.3	protein_coding	142.02	205.75	1.44874
SET	ENSG00000119335.16	protein_coding	253.52	367.27	1.44868
TAF1A	ENSG00000143498.17	protein_coding	10.12	14.66	1.44862
POLQ	ENSG00000051341.13	protein_coding	5.64	8.17	1.44858
HSP90AA1	ENSG00000080824.18	protein_coding	666.6	965.12	1.44782
CEP55	ENSG00000138180.15	protein_coding	65.14	94.3	1.44765
ARL6IP1	ENSG00000170540.14	protein_coding	266.7	386.02	1.44739
TFB2M	ENSG00000162851.7	protein_coding	27.17	39.31	1.44682
ZNF260	ENSG00000254004.6	protein_coding	5.82	8.42	1.44674
ZNF367	ENSG00000165244.6	protein_coding	9.86	14.26	1.44625
COQ3	ENSG00000132423.11	protein_coding	12.64	18.28	1.4462
C19orf44	ENSG00000105072.8	protein_coding	3.79	5.48	1.44591
PLAGL2	ENSG00000126003.6	protein_coding	7.83	11.32	1.44572
CCDC88A	ENSG00000115355.15	protein_coding	12.79	18.49	1.44566
AP1G1	ENSG00000166747.12	protein_coding	23.16	33.48	1.4456
HAT1	ENSG00000128708.12	protein_coding	56.67	81.9	1.44521
SSR2	ENSG00000163479.13	protein_coding	128.57	185.76	1.44482
POMZP3	ENSG00000146707.14	protein_coding	2.88	4.16	1.44444
PPP1CC	ENSG00000186298.11	protein_coding	127.02	183.38	1.44371
TYMS	ENSG00000176890.15	protein_coding	73.15	105.56	1.44306
ZNF69	ENSG00000198429.9	protein_coding	2.37	3.42	1.44304
IDH3A	ENSG00000166411.13	protein_coding	20.5	29.58	1.44293
FAR1	ENSG00000197601.12	protein_coding	29.5	42.56	1.44271
TMEM68	ENSG00000167904.14	protein_coding	10.06	14.51	1.44235
AIMP1	ENSG00000164022.16	protein_coding	35.02	50.51	1.44232
TRAF3IP2	ENSG00000056972.18	protein_coding	14.79	21.33	1.44219
SLC6A15	ENSG00000072041.16	protein_coding	14.98	21.6	1.44192
DHX29	ENSG00000067248.9	protein_coding	6.5	9.37	1.44154
CCSAP	ENSG00000154429.10	protein_coding	3.33	4.8	1.44144
L3MBTL2	ENSG00000100395.14	protein_coding	8.21	11.83	1.44093
ICE2	ENSG00000128915.11	protein_coding	18.53	26.7	1.44091
CHAF1B	ENSG00000159259.7	protein_coding	7.35	10.59	1.44082
ZNF587B	ENSG00000269343.6	protein_coding	2.86	4.12	1.44056
NUDT21	ENSG00000167005.13	protein_coding	51.24	73.81	1.44048
CC2D2A	ENSG00000048342.15	protein_coding	2.25	3.24	1.44
GFM1	ENSG00000168827.14	protein_coding	15.08	21.71	1.43966
PTGES3	ENSG00000110958.15	protein_coding	373.99	538.39	1.43958
VPS26A	ENSG00000122958.14	protein_coding	70.66	101.71	1.43943
SLFN12	ENSG00000172123.12	protein_coding	15.87	22.84	1.43919
ROR1	ENSG00000185483.11	protein_coding	9.65	13.88	1.43834
RPAP3	ENSG00000005175.9	protein_coding	23.57	33.9	1.43827
GAR1	ENSG00000109534.16	protein_coding	34	48.9	1.43824
HAUS8	ENSG00000131351.14	protein_coding	16.41	23.6	1.43815
LIPT2	ENSG00000175536.6	protein_coding	1.21	1.74	1.43802
HOXA10	ENSG00000253293.4	protein_coding	5.94	8.54	1.43771
FIZ1	ENSG00000179943.7	protein_coding	7.91	11.37	1.43742
ARL6IP6	ENSG00000177917.10	protein_coding	40.86	58.73	1.43735
ZSCAN2	ENSG00000176371.13	protein_coding	2.63	3.78	1.43726
ZCCHC9	ENSG00000131732.11	protein_coding	25	35.93	1.4372
AKTIP	ENSG00000166971.16	protein_coding	9.5	13.65	1.43684
AHSA1	ENSG00000100591.7	protein_coding	104.88	150.68	1.43669
MMS22L	ENSG00000146263.11	protein_coding	9.58	13.76	1.43633
G0S2	ENSG00000123689.5	protein_coding	800.65	1149.51	1.43572
SPAG16	ENSG00000144451.18	protein_coding	17.08	24.52	1.4356
PRDM11	ENSG00000019485.12	protein_coding	4.87	6.99	1.43532
CNTLN	ENSG00000044459.14	protein_coding	4.25	6.1	1.43529
FANCB	ENSG00000181544.13	protein_coding	3.4	4.88	1.43529
ZNF79	ENSG00000196152.10	protein_coding	1.7	2.44	1.43529
NET1	ENSG00000173848.18	protein_coding	9.89	14.19	1.43478
SPATA5L1	ENSG00000171763.17	protein_coding	7.27	10.43	1.43466
DOCK4	ENSG00000128512.19	protein_coding	8.4	12.05	1.43452
PHF6	ENSG00000156531.16	protein_coding	26.89	38.57	1.43436
ARMCX5	ENSG00000125962.14	protein_coding	6.61	9.48	1.43419
CDKL3	ENSG00000006837.11	protein_coding	2.58	3.7	1.43411
ZNF267	ENSG00000185947.14	protein_coding	9.1	13.05	1.43407
RHOBTB3	ENSG00000164292.12	protein_coding	27.21	39.02	1.43403
CSTF3	ENSG00000176102.11	protein_coding	23.85	34.2	1.43396
CDC25C	ENSG00000158402.18	protein_coding	3.48	4.99	1.43391
OMA1	ENSG00000162600.11	protein_coding	17.17	24.62	1.4339
CASP3	ENSG00000164305.18	protein_coding	21.68	31.08	1.43358
FABP5	ENSG00000164687.10	protein_coding	31.15	44.65	1.43339
ATP8B1	ENSG00000081923.11	protein_coding	42.48	60.88	1.43315
DHX35	ENSG00000101452.14	protein_coding	8.45	12.11	1.43314
DHX33	ENSG00000005100.12	protein_coding	8.66	12.41	1.43303
NUP153	ENSG00000124789.11	protein_coding	32.45	46.5	1.43297
MIS18A	ENSG00000159055.3	protein_coding	11.6	16.62	1.43276
SPRY2	ENSG00000136158.11	protein_coding	10.75	15.4	1.43256
RECQL4	ENSG00000160957.12	protein_coding	25.27	36.2	1.43253
CKAP2L	ENSG00000169607.12	protein_coding	23.1	33.09	1.43247
TXNL4B	ENSG00000140830.8	protein_coding	6.57	9.41	1.43227
THAP7	ENSG00000184436.11	protein_coding	9.72	13.92	1.4321
CDC25A	ENSG00000164045.11	protein_coding	6.46	9.25	1.43189
SKIL	ENSG00000136603.13	protein_coding	19.78	28.32	1.43175
RMND5A	ENSG00000153561.12	protein_coding	8.25	11.81	1.43152
ARL17B	ENSG00000228696.8	protein_coding	4.01	5.74	1.43142
TRIM37	ENSG00000108395.13	protein_coding	19.38	27.74	1.43137
CCDC77	ENSG00000120647.9	protein_coding	5.82	8.33	1.43127
MIS12	ENSG00000167842.15	protein_coding	6.61	9.46	1.43116
DENR	ENSG00000139726.10	protein_coding	88.48	126.6	1.43083
STARD7	ENSG00000084090.13	protein_coding	86.33	123.5	1.43056
GPAT3	ENSG00000138678.10	protein_coding	12.08	17.28	1.43046
SLC25A19	ENSG00000125454.11	protein_coding	7.54	10.78	1.42971
UCN2	ENSG00000145040.3	protein_coding	1.63	2.33	1.42945
CD302	ENSG00000241399.6	protein_coding	4.38	6.26	1.42922
ENOPH1	ENSG00000145293.15	protein_coding	51.42	73.49	1.42921
CHRNA5	ENSG00000169684.13	protein_coding	4.73	6.76	1.42918
KNSTRN	ENSG00000128944.13	protein_coding	38.1	54.43	1.42861
ALDH3A2	ENSG00000072210.18	protein_coding	5.79	8.27	1.42832
PARN	ENSG00000140694.16	protein_coding	26.02	37.16	1.42813
MAGOHB	ENSG00000111196.9	protein_coding	52.7	75.26	1.42808
B4GALT1	ENSG00000086062.12	protein_coding	38.19	54.5	1.42708
EPT1	ENSG00000138018.17	protein_coding	13.21	18.85	1.42695
FAM98B	ENSG00000171262.11	protein_coding	14.01	19.99	1.42684
FANCA	ENSG00000187741.14	protein_coding	13.29	18.96	1.42664
LIN54	ENSG00000189308.10	protein_coding	7.97	11.37	1.4266
AKAP12	ENSG00000131016.16	protein_coding	46.52	66.36	1.42648
C21orf59	ENSG00000159079.18	protein_coding	23.81	33.96	1.42629
HNRNPA2B1	ENSG00000122566.20	protein_coding	727.28	1037.12	1.42603
POLR3B	ENSG00000013503.9	protein_coding	7.71	10.99	1.42542
AKAP1	ENSG00000121057.12	protein_coding	13.79	19.65	1.42495
GALNT7	ENSG00000109586.11	protein_coding	50.35	71.73	1.42463
ZCCHC10	ENSG00000155329.11	protein_coding	9.35	13.32	1.4246
PAICS	ENSG00000128050.8	protein_coding	189.6	270.03	1.42421
PLCD1	ENSG00000187091.13	protein_coding	1.58	2.25	1.42405
NANP	ENSG00000170191.4	protein_coding	4.01	5.71	1.42394
ZNF525	ENSG00000203326.10	protein_coding	5.17	7.36	1.4236
VMA21	ENSG00000160131.13	protein_coding	18.3	26.05	1.4235
ECT2	ENSG00000114346.13	protein_coding	63.13	89.86	1.42341
GK5	ENSG00000175066.15	protein_coding	5.81	8.27	1.42341
SEC23IP	ENSG00000107651.12	protein_coding	18.3	26.04	1.42295
GTF2A1	ENSG00000165417.11	protein_coding	11.61	16.52	1.42291
NEK11	ENSG00000114670.13	protein_coding	4.78	6.8	1.42259
NUP98	ENSG00000110713.15	protein_coding	38.49	54.75	1.42245
SNX10	ENSG00000086300.15	protein_coding	15.37	21.86	1.42225
ALOX5AP	ENSG00000132965.9	protein_coding	5.85	8.32	1.42222
TP53RK	ENSG00000172315.5	protein_coding	5.69	8.09	1.42179
GPX8	ENSG00000164294.13	protein_coding	51.28	72.88	1.42122
SDPR	ENSG00000168497.4	protein_coding	23.29	33.1	1.42121
NOL9	ENSG00000162408.10	protein_coding	6.08	8.64	1.42105
TRMT10B	ENSG00000165275.9	protein_coding	2.66	3.78	1.42105
FBXO34	ENSG00000178974.9	protein_coding	12.21	17.35	1.42097
HMGXB4	ENSG00000100281.13	protein_coding	12.53	17.8	1.42059
PSME3	ENSG00000131467.10	protein_coding	111.64	158.59	1.42055
ZNF165	ENSG00000197279.3	protein_coding	1.95	2.77	1.42051
PRMT3	ENSG00000185238.12	protein_coding	8.26	11.73	1.4201
FUT4	ENSG00000196371.3	protein_coding	2.19	3.11	1.42009
MCM6	ENSG00000076003.4	protein_coding	66.82	94.88	1.41993
ZBTB3	ENSG00000185670.7	protein_coding	1.81	2.57	1.41989
FOXK2	ENSG00000141568.20	protein_coding	21.82	30.98	1.4198
FAM196B	ENSG00000204767.3	protein_coding	1.98	2.81	1.41919
ZNF286A	ENSG00000187607.15	protein_coding	10.02	14.22	1.41916
ENC1	ENSG00000171617.13	protein_coding	14.99	21.27	1.41895
DUSP14	ENSG00000276023.4	protein_coding	55.43	78.64	1.41873
PSIP1	ENSG00000164985.14	protein_coding	67.27	95.43	1.41861
B3GALNT1	ENSG00000169255.13	protein_coding	3.99	5.66	1.41855
NDUFAF4	ENSG00000123545.5	protein_coding	21.22	30.1	1.41847
UBTD2	ENSG00000168246.5	protein_coding	13.12	18.61	1.41845
CDT1	ENSG00000167513.8	protein_coding	17.16	24.34	1.41841
ORC6	ENSG00000091651.8	protein_coding	18.42	26.12	1.41802
LRP12	ENSG00000147650.11	protein_coding	22.59	32.03	1.41788
RECQL	ENSG00000004700.15	protein_coding	42.07	59.65	1.41787
SMYD4	ENSG00000186532.11	protein_coding	4.93	6.99	1.41785
ERCC8	ENSG00000049167.13	protein_coding	5.58	7.91	1.41756
FAM111A	ENSG00000166801.15	protein_coding	18.69	26.49	1.41734
LRIG1	ENSG00000144749.13	protein_coding	7.74	10.97	1.41731
POC5	ENSG00000152359.14	protein_coding	5.18	7.34	1.41699
SLC30A5	ENSG00000145740.18	protein_coding	24.18	34.26	1.41687
RAB36	ENSG00000100228.12	protein_coding	1.2	1.7	1.41667
PPM1H	ENSG00000111110.11	protein_coding	5.16	7.31	1.41667
TMEM237	ENSG00000155755.18	protein_coding	26.58	37.65	1.41648
GTPBP4	ENSG00000107937.18	protein_coding	36.03	51.03	1.41632
C4orf22	ENSG00000197826.11	protein_coding	1.49	2.11	1.41611
CCNB1	ENSG00000134057.14	protein_coding	135.5	191.84	1.41579
TICRR	ENSG00000140534.13	protein_coding	4.62	6.54	1.41558
SSB	ENSG00000138385.15	protein_coding	141.52	200.24	1.41492
CMTM6	ENSG00000091317.7	protein_coding	38.21	54.06	1.41481
HEY1	ENSG00000164683.16	protein_coding	1.93	2.73	1.41451
BUB1B	ENSG00000156970.12	protein_coding	22.96	32.47	1.4142
CBFB	ENSG00000067955.13	protein_coding	26.66	37.7	1.4141
SHISA2	ENSG00000180730.4	protein_coding	40.61	57.42	1.41394
E2F1	ENSG00000101412.12	protein_coding	20.79	29.39	1.41366
L2HGDH	ENSG00000087299.11	protein_coding	3.68	5.2	1.41304
TMEM110	ENSG00000213533.11	protein_coding	5.33	7.53	1.41276
PPA2	ENSG00000138777.19	protein_coding	74.51	105.26	1.4127
ZNF280C	ENSG00000056277.15	protein_coding	1.94	2.74	1.41237
SIX4	ENSG00000100625.8	protein_coding	2.5	3.53	1.412
MTHFD2	ENSG00000065911.11	protein_coding	89.07	125.75	1.41181
KIF11	ENSG00000138160.5	protein_coding	30.54	43.1	1.41126
DENND5B	ENSG00000170456.15	protein_coding	6.98	9.85	1.41117
LASP1	ENSG00000002834.17	protein_coding	183.94	259.57	1.41117
MED7	ENSG00000155868.7	protein_coding	6.69	9.44	1.41106
BTBD1	ENSG00000064726.9	protein_coding	32.34	45.62	1.41064
GATSL2	ENSG00000274070.1	protein_coding	3.02	4.26	1.4106
CENPI	ENSG00000102384.13	protein_coding	14.98	21.13	1.41055
ZNF180	ENSG00000167384.10	protein_coding	3.63	5.12	1.41047
INPP5F	ENSG00000198825.12	protein_coding	4.63	6.53	1.41037
LRRCC1	ENSG00000133739.15	protein_coding	4.07	5.74	1.41032
CTCF	ENSG00000102974.14	protein_coding	17.11	24.13	1.41029
FAM200B	ENSG00000237765.6	protein_coding	50.73	71.54	1.41021
DNAJA1	ENSG00000086061.15	protein_coding	93.53	131.89	1.41014
EXOC6	ENSG00000138190.16	protein_coding	4.95	6.98	1.4101
HERC6	ENSG00000138642.14	protein_coding	6	8.46	1.41
BYSL	ENSG00000112578.9	protein_coding	20.36	28.7	1.40963
SCOC	ENSG00000153130.17	protein_coding	51.34	72.35	1.40923
NIPA2	ENSG00000140157.14	protein_coding	34.58	48.73	1.4092
ZNF516	ENSG00000101493.10	protein_coding	5.11	7.2	1.409
GOSR2	ENSG00000108433.15	protein_coding	27.22	38.35	1.40889
FRAT2	ENSG00000181274.6	protein_coding	5.14	7.24	1.40856
ZWINT	ENSG00000122952.16	protein_coding	66.09	93.09	1.40853
OSTM1	ENSG00000081087.14	protein_coding	16.05	22.6	1.4081
CDKN2AIP	ENSG00000168564.5	protein_coding	12.52	17.62	1.40735
WDFY2	ENSG00000139668.8	protein_coding	3.29	4.63	1.40729
CCNYL1	ENSG00000163249.10	protein_coding	27.39	38.54	1.40708
LYST	ENSG00000143669.13	protein_coding	8.31	11.69	1.40674
AURKA	ENSG00000087586.17	protein_coding	98.31	138.29	1.40667
HNMT	ENSG00000150540.13	protein_coding	13.01	18.3	1.40661
ZNF383	ENSG00000188283.11	protein_coding	2.66	3.74	1.40602
ASPM	ENSG00000066279.16	protein_coding	36.69	51.57	1.40556
DDX18	ENSG00000088205.12	protein_coding	99.69	140.12	1.40556
RPUSD2	ENSG00000166133.17	protein_coding	6.56	9.22	1.40549
WDR36	ENSG00000134987.11	protein_coding	11.84	16.64	1.40541
METTL2B	ENSG00000165055.15	protein_coding	16.68	23.44	1.40528
TGM1	ENSG00000092295.11	protein_coding	1.21	1.7	1.40496
RABEP1	ENSG00000029725.16	protein_coding	18.67	26.23	1.40493
METAP1D	ENSG00000172878.13	protein_coding	4.57	6.42	1.40481
TAP2	ENSG00000204267.13	protein_coding	20.83	29.26	1.4047
FKBP11	ENSG00000134285.10	protein_coding	26.5	37.22	1.40453
RFK	ENSG00000135002.11	protein_coding	11.94	16.77	1.40452
CCDC138	ENSG00000163006.11	protein_coding	5.02	7.05	1.40438
ZNF134	ENSG00000213762.11	protein_coding	10.2	14.32	1.40392
PPTC7	ENSG00000196850.5	protein_coding	14.85	20.84	1.40337
NUP37	ENSG00000075188.8	protein_coding	86.34	121.16	1.40329
ZNF816	ENSG00000180257.13	protein_coding	6.16	8.64	1.4026
XIAP	ENSG00000101966.12	protein_coding	35.77	50.17	1.40257
2018-03-02	ENSG00000117791.15	protein_coding	10.36	14.53	1.40251
MRPS10	ENSG00000048544.5	protein_coding	53.8	75.45	1.40242
MT1X	ENSG00000187193.8	protein_coding	81.66	114.52	1.4024
TAF15	ENSG00000270647.5	protein_coding	157.56	220.93	1.4022
PCNA	ENSG00000132646.10	protein_coding	174.69	244.91	1.40197
RFWD3	ENSG00000168411.13	protein_coding	17.54	24.59	1.40194
TPP2	ENSG00000134900.11	protein_coding	39	54.67	1.40179
BACE2	ENSG00000182240.15	protein_coding	2.39	3.35	1.40167
ABLIM1	ENSG00000099204.18	protein_coding	7.1	9.95	1.40141
MRPL42	ENSG00000198015.12	protein_coding	59.32	83.12	1.40121
RP11-872D17.8	ENSG00000254979.5	protein_coding	1.67	2.34	1.4012
KLHL8	ENSG00000145332.13	protein_coding	7.36	10.31	1.40082
ZNF254	ENSG00000213096.10	protein_coding	5.84	8.18	1.40068
KANSL2	ENSG00000139620.12	protein_coding	24.09	33.74	1.40058
MPC1	ENSG00000060762.18	protein_coding	6.12	8.57	1.40033
UNG	ENSG00000076248.10	protein_coding	54.86	76.8	1.39993
MDP1	ENSG00000213920.8	protein_coding	9.78	13.69	1.3998
KPNA2	ENSG00000182481.8	protein_coding	189.07	264.62	1.39959
FBXO30	ENSG00000118496.4	protein_coding	5.66	7.92	1.39929
ZNF616	ENSG00000204611.6	protein_coding	5.41	7.57	1.39926
SLC27A5	ENSG00000083807.9	protein_coding	4.76	6.66	1.39916
TRIM35	ENSG00000104228.12	protein_coding	4.51	6.31	1.39911
ASNSD1	ENSG00000138381.9	protein_coding	32.73	45.79	1.39902
STRIP2	ENSG00000128578.9	protein_coding	3.66	5.12	1.39891
CD3EAP	ENSG00000117877.10	protein_coding	23.09	32.3	1.39887
NRIP1	ENSG00000180530.10	protein_coding	6.97	9.75	1.39885
DEPDC7	ENSG00000121690.10	protein_coding	3.31	4.63	1.39879
FAM72D	ENSG00000215784.5	protein_coding	3.26	4.56	1.39877
API5	ENSG00000166181.12	protein_coding	61.94	86.63	1.39861
HRASLS	ENSG00000127252.5	protein_coding	2.11	2.95	1.3981
BNIP1	ENSG00000113734.17	protein_coding	12.49	17.46	1.39792
HFE	ENSG00000010704.18	protein_coding	13.65	19.08	1.3978
SIRT1	ENSG00000096717.11	protein_coding	13.59	18.99	1.39735
MTERF1	ENSG00000127989.13	protein_coding	8.23	11.5	1.39733
CNOT10	ENSG00000182973.18	protein_coding	8.76	12.24	1.39726
B4GALT2	ENSG00000117411.16	protein_coding	44.71	62.45	1.39678
GPR85	ENSG00000164604.12	protein_coding	2.32	3.24	1.39655
SEMA3C	ENSG00000075223.13	protein_coding	125.79	175.67	1.39653
PRR19	ENSG00000188368.9	protein_coding	1.69	2.36	1.39645
GPD2	ENSG00000115159.15	protein_coding	16.02	22.37	1.39638
U2SURP	ENSG00000163714.17	protein_coding	100.2	139.9	1.39621
PEX1	ENSG00000127980.15	protein_coding	11.89	16.6	1.39613
RPRD1A	ENSG00000141425.17	protein_coding	28.74	40.12	1.39596
HMGN2	ENSG00000198830.10	protein_coding	533.27	744.42	1.39595
DIMT1	ENSG00000086189.9	protein_coding	13.97	19.5	1.39585
RABEPK	ENSG00000136933.16	protein_coding	18.78	26.21	1.39563
HNRNPR	ENSG00000125944.18	protein_coding	117.02	163.31	1.39557
TCTEX1D2	ENSG00000213123.10	protein_coding	16.71	23.32	1.39557
CSAD	ENSG00000139631.18	protein_coding	6.65	9.28	1.39549
DDX5	ENSG00000108654.12	protein_coding	220.12	307.17	1.39547
NEIL3	ENSG00000109674.3	protein_coding	10.05	14.02	1.39502
USP5	ENSG00000111667.13	protein_coding	64.01	89.28	1.39478
RARS	ENSG00000113643.8	protein_coding	64.66	90.17	1.39453
ANGEL2	ENSG00000174606.13	protein_coding	19.48	27.16	1.39425
CDCA2	ENSG00000184661.13	protein_coding	15.13	21.09	1.39392
DLG3	ENSG00000082458.11	protein_coding	9.5	13.24	1.39368
SLC9A6	ENSG00000198689.10	protein_coding	13.16	18.34	1.39362
MCM3	ENSG00000112118.17	protein_coding	84.68	118.01	1.3936
POC1A	ENSG00000164087.7	protein_coding	9.96	13.88	1.39357
UNK	ENSG00000132478.9	protein_coding	15.02	20.93	1.39348
ZFC3H1	ENSG00000133858.15	protein_coding	15.28	21.29	1.39332
THUMPD3	ENSG00000134077.15	protein_coding	29.84	41.57	1.3931
UAP1	ENSG00000117143.13	protein_coding	82.41	114.8	1.39303
TTK	ENSG00000112742.9	protein_coding	24.23	33.75	1.3929
ATP2B1	ENSG00000070961.15	protein_coding	63.15	87.96	1.39287
GPR89A	ENSG00000117262.18	protein_coding	11.74	16.35	1.39267
C15orf57	ENSG00000128891.15	protein_coding	7.54	10.5	1.39257
PAK1IP1	ENSG00000111845.4	protein_coding	21.3	29.66	1.39249
SLC20A1	ENSG00000144136.10	protein_coding	104.78	145.89	1.39235
C15orf61	ENSG00000189227.5	protein_coding	1.02	1.42	1.39216
TTC13	ENSG00000143643.12	protein_coding	6.99	9.73	1.39199
NUCKS1	ENSG00000069275.12	protein_coding	131.18	182.58	1.39183
LNP1	ENSG00000206535.7	protein_coding	2.2	3.06	1.39091
LY6K	ENSG00000160886.13	protein_coding	27.19	37.8	1.39022
PKNOX1	ENSG00000160199.14	protein_coding	9.74	13.54	1.39014
ARMC6	ENSG00000105676.13	protein_coding	19.14	26.6	1.38976
MTDH	ENSG00000147649.9	protein_coding	57.77	80.27	1.38948
TOMM7	ENSG00000196683.10	protein_coding	250.41	347.93	1.38944
PLEKHH2	ENSG00000152527.13	protein_coding	2.75	3.82	1.38909
ARHGAP12	ENSG00000165322.17	protein_coding	11.16	15.5	1.38889
TSNAX	ENSG00000116918.13	protein_coding	23.87	33.15	1.38877
PA2G4	ENSG00000170515.13	protein_coding	145.31	201.79	1.38869
AC129492.1	ENSG00000279152.1	protein_coding	2.29	3.18	1.38865
C10orf88	ENSG00000119965.12	protein_coding	4.62	6.41	1.38745
PALB2	ENSG00000083093.9	protein_coding	9.89	13.72	1.38726
CLEC4E	ENSG00000166523.7	protein_coding	4.39	6.09	1.38724
RNF214	ENSG00000167257.10	protein_coding	9.09	12.61	1.38724
SNRNP40	ENSG00000060688.12	protein_coding	50.34	69.83	1.38717
NCAPD3	ENSG00000151503.12	protein_coding	15.58	21.61	1.38703
DHX30	ENSG00000132153.14	protein_coding	20.24	28.07	1.38686
PIK3C2A	ENSG00000011405.13	protein_coding	16.57	22.98	1.38684
CEP83	ENSG00000173588.14	protein_coding	8.2	11.37	1.38659
PET117	ENSG00000232838.3	protein_coding	5.95	8.25	1.38655
ZFYVE16	ENSG00000039319.16	protein_coding	9.89	13.71	1.38625
LLPH	ENSG00000139233.6	protein_coding	41.38	57.35	1.38594
SMAGP	ENSG00000170545.16	protein_coding	34.96	48.44	1.38558
LDLRAD3	ENSG00000179241.12	protein_coding	2.78	3.85	1.38489
ZNF468	ENSG00000204604.9	protein_coding	4.99	6.91	1.38477
CD163L1	ENSG00000177675.8	protein_coding	7.93	10.98	1.38462
PANK3	ENSG00000120137.6	protein_coding	9.23	12.78	1.38462
GLRX3	ENSG00000108010.11	protein_coding	89.79	124.31	1.38445
DNAAF3	ENSG00000167646.13	protein_coding	3.33	4.61	1.38438
ZBED1	ENSG00000214717.10	protein_coding	9.21	12.75	1.38436
BCAS2	ENSG00000116752.5	protein_coding	32.35	44.78	1.38423
NRBF2	ENSG00000148572.15	protein_coding	21.37	29.58	1.38418
HSPA14	ENSG00000187522.14	protein_coding	17.43	24.12	1.38382
FOCAD	ENSG00000188352.12	protein_coding	7.87	10.89	1.38374
LONRF3	ENSG00000175556.16	protein_coding	3.18	4.4	1.38365
C9orf40	ENSG00000135045.6	protein_coding	5.71	7.9	1.38354
FGFR1OP	ENSG00000213066.11	protein_coding	8.14	11.26	1.38329
C7orf73	ENSG00000243317.7	protein_coding	35.52	49.13	1.38316
ANKRD42	ENSG00000137494.13	protein_coding	3.97	5.49	1.38287
HNRNPAB	ENSG00000197451.11	protein_coding	122.4	169.26	1.38284
ZNF736	ENSG00000234444.9	protein_coding	2.9	4.01	1.38276
SRPK2	ENSG00000135250.16	protein_coding	30.6	42.31	1.38268
NAE1	ENSG00000159593.14	protein_coding	44.95	62.15	1.38265
SMARCAD1	ENSG00000163104.17	protein_coding	15.4	21.29	1.38247
PTPN2	ENSG00000175354.18	protein_coding	18.91	26.14	1.38234
RNASEH1	ENSG00000171865.9	protein_coding	14.57	20.14	1.38229
BAG1	ENSG00000107262.17	protein_coding	24.18	33.42	1.38213
IPO4	ENSG00000196497.15	protein_coding	16.39	22.65	1.38194
LYPLA1	ENSG00000120992.17	protein_coding	55.22	76.31	1.38193
TOP3A	ENSG00000177302.14	protein_coding	12.36	17.08	1.38188
POLE4	ENSG00000115350.11	protein_coding	10.82	14.95	1.3817
SH3PXD2A	ENSG00000107957.16	protein_coding	8.44	11.66	1.38152
BCAS4	ENSG00000124243.17	protein_coding	16.68	23.04	1.38129
RBM12	ENSG00000244462.7	protein_coding	39.84	55.03	1.38128
ST6GAL1	ENSG00000073849.14	protein_coding	4.25	5.87	1.38118
MCMBP	ENSG00000197771.12	protein_coding	35.05	48.41	1.38117
IFRD2	ENSG00000214706.10	protein_coding	32.15	44.4	1.38103
RAB38	ENSG00000123892.11	protein_coding	6.49	8.96	1.38059
NAV3	ENSG00000067798.14	protein_coding	4.1	5.66	1.38049
TMTC4	ENSG00000125247.15	protein_coding	6.86	9.47	1.38047
YBEY	ENSG00000182362.13	protein_coding	4.89	6.75	1.38037
CENPK	ENSG00000123219.12	protein_coding	15.36	21.2	1.38021
PDZD8	ENSG00000165650.11	protein_coding	11.16	15.4	1.37993
RWDD2B	ENSG00000156253.6	protein_coding	9.03	12.46	1.37984
SKP2	ENSG00000145604.15	protein_coding	20.52	28.31	1.37963
APOBEC3B	ENSG00000179750.15	protein_coding	26.37	36.38	1.3796
MIOS	ENSG00000164654.15	protein_coding	11.49	15.85	1.37946
TTC33	ENSG00000113638.13	protein_coding	10.44	14.4	1.37931
NRGN	ENSG00000154146.12	protein_coding	11.34	15.64	1.37919
SMCHD1	ENSG00000101596.14	protein_coding	11.48	15.83	1.37892
LMO7	ENSG00000136153.19	protein_coding	34.69	47.83	1.37878
HNRNPH3	ENSG00000096746.17	protein_coding	220.74	304.29	1.3785
ZNF34	ENSG00000196378.11	protein_coding	2.3	3.17	1.37826
CREM	ENSG00000095794.19	protein_coding	16.55	22.81	1.37825
KIF23	ENSG00000137807.13	protein_coding	43.73	60.27	1.37823
CEP131	ENSG00000141577.13	protein_coding	11.64	16.04	1.37801
CA11	ENSG00000063180.8	protein_coding	8.92	12.29	1.3778
UMPS	ENSG00000114491.13	protein_coding	30.06	41.41	1.37758
HMGB1	ENSG00000189403.14	protein_coding	430.03	592.34	1.37744
SIPA1L3	ENSG00000105738.10	protein_coding	28.23	38.88	1.37726
OXSR1	ENSG00000172939.8	protein_coding	22.24	30.63	1.37725
WDR82	ENSG00000164091.11	protein_coding	35.84	49.36	1.37723
SOCS1	ENSG00000185338.4	protein_coding	5.17	7.12	1.37718
UBE2G1	ENSG00000132388.12	protein_coding	31.32	43.13	1.37708
RANBP3	ENSG00000031823.14	protein_coding	50.68	69.79	1.37707
WDR81	ENSG00000167716.18	protein_coding	4.67	6.43	1.37687
RCBTB1	ENSG00000136144.11	protein_coding	7.43	10.23	1.37685
FAM53A	ENSG00000174137.12	protein_coding	1.38	1.9	1.37681
NEK2	ENSG00000117650.12	protein_coding	36.71	50.54	1.37674
PPIL4	ENSG00000131013.3	protein_coding	24.89	34.26	1.37646
GINS1	ENSG00000101003.9	protein_coding	16.17	22.25	1.376
DNLZ	ENSG00000213221.4	protein_coding	8.87	12.2	1.37542
WDR89	ENSG00000140006.11	protein_coding	6.74	9.27	1.37537
FAIM	ENSG00000158234.12	protein_coding	14.04	19.31	1.37536
TSEN15	ENSG00000198860.11	protein_coding	22.17	30.49	1.37528
PSPC1	ENSG00000121390.18	protein_coding	19.16	26.35	1.37526
ZNF300	ENSG00000145908.12	protein_coding	3.52	4.84	1.375
DPY19L1	ENSG00000173852.14	protein_coding	20.65	28.39	1.37482
WHAMM	ENSG00000156232.7	protein_coding	6.78	9.32	1.37463
NSUN2	ENSG00000037474.14	protein_coding	72.98	100.32	1.37462
PINX1	ENSG00000254093.8	protein_coding	3.31	4.55	1.37462
MTERF4	ENSG00000122085.16	protein_coding	25.11	34.51	1.37435
APAF1	ENSG00000120868.13	protein_coding	21.83	30	1.37426
TXNDC9	ENSG00000115514.11	protein_coding	41.82	57.47	1.37422
G2E3	ENSG00000092140.14	protein_coding	11.95	16.42	1.37406
TTC30A	ENSG00000197557.6	protein_coding	2.22	3.05	1.37387
MTHFD1	ENSG00000100714.15	protein_coding	59.69	82	1.37376
SYNCRIP	ENSG00000135316.17	protein_coding	112.37	154.34	1.3735
EED	ENSG00000074266.18	protein_coding	12.7	17.44	1.37323
RCN2	ENSG00000117906.13	protein_coding	49.59	68.07	1.37266
ARIH2	ENSG00000177479.19	protein_coding	29.19	40.06	1.37239
SLBP	ENSG00000163950.12	protein_coding	98.85	135.63	1.37208
CHAMP1	ENSG00000198824.5	protein_coding	15.32	21.02	1.37206
HERC3	ENSG00000138641.15	protein_coding	28.33	38.86	1.37169
PIGA	ENSG00000165195.15	protein_coding	8.96	12.29	1.37165
STMN1	ENSG00000117632.21	protein_coding	580.09	795.65	1.3716
FANCG	ENSG00000221829.9	protein_coding	18.87	25.88	1.37149
CCDC34	ENSG00000109881.16	protein_coding	9.1	12.48	1.37143
EVI2A	ENSG00000126860.11	protein_coding	6.92	9.49	1.37139
GDPGP1	ENSG00000183208.12	protein_coding	2.02	2.77	1.37129
LZIC	ENSG00000162441.11	protein_coding	31.49	43.18	1.37123
HAUS1	ENSG00000152240.12	protein_coding	26.4	36.2	1.37121
BUB1	ENSG00000169679.14	protein_coding	66.7	91.43	1.37076
TMEM5	ENSG00000118600.11	protein_coding	20.31	27.84	1.37075
PLEKHA8	ENSG00000106086.18	protein_coding	5.67	7.77	1.37037
PSMA3	ENSG00000100567.12	protein_coding	117.82	161.45	1.37031
GMEB1	ENSG00000162419.12	protein_coding	4.27	5.85	1.37002
PRMT6	ENSG00000198890.7	protein_coding	8.65	11.85	1.36994
PRPS2	ENSG00000101911.12	protein_coding	56.26	77.07	1.36989
SOAT1	ENSG00000057252.12	protein_coding	33.47	45.85	1.36988
CCDC18	ENSG00000122483.17	protein_coding	9.52	13.04	1.36975
COPS3	ENSG00000141030.12	protein_coding	52.05	71.29	1.36964
CCDC122	ENSG00000151773.12	protein_coding	5.85	8.01	1.36923
LPAR1	ENSG00000198121.13	protein_coding	11.95	16.36	1.36904
ILF2	ENSG00000143621.16	protein_coding	107.92	147.72	1.36879
BMS1	ENSG00000165733.7	protein_coding	18.71	25.61	1.36879
GTSE1	ENSG00000075218.18	protein_coding	26.28	35.96	1.36834
LARP4	ENSG00000161813.21	protein_coding	20.8	28.46	1.36827
TBX2	ENSG00000121068.13	protein_coding	1.82	2.49	1.36813
SNRK	ENSG00000163788.13	protein_coding	5.19	7.1	1.36802
TMEM39B	ENSG00000121775.17	protein_coding	11.63	15.91	1.36801
CLN6	ENSG00000128973.12	protein_coding	21.4	29.27	1.36776
NCOA7	ENSG00000111912.19	protein_coding	10.56	14.44	1.36742
EEPD1	ENSG00000122547.10	protein_coding	1.96	2.68	1.36735
PLCL2	ENSG00000154822.16	protein_coding	2.07	2.83	1.36715
APOBEC3H	ENSG00000100298.15	protein_coding	1.2	1.64	1.36667
SNTB2	ENSG00000168807.16	protein_coding	3.9	5.33	1.36667
ZNF121	ENSG00000197961.11	protein_coding	7.97	10.89	1.36637
KIAA1841	ENSG00000162929.13	protein_coding	3.85	5.26	1.36623
NUP205	ENSG00000155561.14	protein_coding	44.17	60.34	1.36609
SPICE1	ENSG00000163611.11	protein_coding	5.93	8.1	1.36594
SLC25A32	ENSG00000164933.11	protein_coding	12.19	16.65	1.36587
FAM49B	ENSG00000153310.18	protein_coding	63.44	86.64	1.3657
FAM133B	ENSG00000234545.7	protein_coding	19.53	26.67	1.36559
ELP6	ENSG00000163832.15	protein_coding	19.07	26.04	1.3655
HNRNPD	ENSG00000138668.18	protein_coding	453.88	619.75	1.36545
C18orf8	ENSG00000141452.9	protein_coding	17.99	24.56	1.3652
KDM8	ENSG00000155666.11	protein_coding	1.26	1.72	1.36508
PSMG3	ENSG00000157778.8	protein_coding	23.45	32.01	1.36503
DDX39A	ENSG00000123136.14	protein_coding	102.58	140.02	1.36498
TRIP13	ENSG00000071539.13	protein_coding	43.96	60	1.36488
C1orf216	ENSG00000142686.7	protein_coding	6.31	8.61	1.3645
OTUD6B	ENSG00000155100.10	protein_coding	5.46	7.45	1.36447
NT5E	ENSG00000135318.11	protein_coding	66.43	90.61	1.36399
KPNA4	ENSG00000186432.8	protein_coding	20.86	28.45	1.36385
CKAP2	ENSG00000136108.14	protein_coding	46.15	62.94	1.36381
OSCP1	ENSG00000116885.18	protein_coding	5.69	7.76	1.3638
TRNT1	ENSG00000072756.16	protein_coding	9.68	13.2	1.36364
RBM14	ENSG00000239306.4	protein_coding	31.01	42.28	1.36343
USP7	ENSG00000187555.14	protein_coding	49.37	67.31	1.36338
RAD17	ENSG00000152942.18	protein_coding	11.98	16.33	1.36311
TSSC1	ENSG00000032389.12	protein_coding	14.79	20.16	1.36308
MTAP	ENSG00000099810.18	protein_coding	29.92	40.78	1.36297
SLFN11	ENSG00000172716.16	protein_coding	40.48	55.17	1.3629
PLPP6	ENSG00000205808.5	protein_coding	2.37	3.23	1.36287
ARL4A	ENSG00000122644.12	protein_coding	18.22	24.83	1.36279
NIT2	ENSG00000114021.11	protein_coding	35.67	48.61	1.36277
CCDC28A	ENSG00000024862.17	protein_coding	16.93	23.07	1.36267
MRPL47	ENSG00000136522.13	protein_coding	36.04	49.11	1.36265
CCNH	ENSG00000134480.13	protein_coding	41.64	56.74	1.36263
CNOT6L	ENSG00000138767.12	protein_coding	11.72	15.97	1.36263
CHST11	ENSG00000171310.10	protein_coding	28.03	38.19	1.36247
SPDYE3	ENSG00000214300.7	protein_coding	1.96	2.67	1.36224
DTL	ENSG00000143476.17	protein_coding	15.66	21.33	1.36207
KCNK3	ENSG00000171303.6	protein_coding	6.66	9.07	1.36186
INTU	ENSG00000164066.12	protein_coding	1.3	1.77	1.36154
DPM1	ENSG00000000419.12	protein_coding	109.73	149.4	1.36152
HNRNPM	ENSG00000099783.11	protein_coding	232.41	316.38	1.3613
ZNF432	ENSG00000256087.6	protein_coding	5.65	7.69	1.36106
NADK2	ENSG00000152620.12	protein_coding	24.35	33.14	1.36099
LSM5	ENSG00000106355.9	protein_coding	44.72	60.86	1.36091
CAPRIN2	ENSG00000110888.17	protein_coding	13.8	18.78	1.36087
C1GALT1C1	ENSG00000171155.7	protein_coding	24.97	33.98	1.36083
GTPBP8	ENSG00000163607.15	protein_coding	10.26	13.96	1.36062
RRAS2	ENSG00000133818.13	protein_coding	289.17	393.43	1.36055
CASP8AP2	ENSG00000118412.12	protein_coding	9.24	12.57	1.36039
DHX36	ENSG00000174953.13	protein_coding	44.87	61.04	1.36037
ZNF3	ENSG00000166526.16	protein_coding	14.44	19.64	1.36011
CCDC137	ENSG00000185298.12	protein_coding	25.77	35.05	1.36011
HJURP	ENSG00000123485.11	protein_coding	44.4	60.38	1.35991
ZNF57	ENSG00000171970.12	protein_coding	2.64	3.59	1.35985
RP11-134F2.8	ENSG00000283149.1	protein_coding	14.94	20.31	1.35944
XRCC3	ENSG00000126215.13	protein_coding	11.3	15.36	1.35929
IMPA1	ENSG00000133731.9	protein_coding	10.41	14.15	1.35927
MSH6	ENSG00000116062.14	protein_coding	70.68	96.07	1.35922
FOXM1	ENSG00000111206.12	protein_coding	70.89	96.34	1.35901
ZNF430	ENSG00000118620.12	protein_coding	3.43	4.66	1.3586
FASTKD3	ENSG00000124279.11	protein_coding	14.25	19.36	1.3586
RRM2	ENSG00000171848.13	protein_coding	78.4	106.51	1.35855
PXYLP1	ENSG00000155893.12	protein_coding	1.06	1.44	1.35849
HSD17B12	ENSG00000149084.12	protein_coding	29.75	40.41	1.35832
BRIP1	ENSG00000136492.8	protein_coding	7.62	10.35	1.35827
UBA5	ENSG00000081307.12	protein_coding	27.66	37.56	1.35792
NCAPH	ENSG00000121152.9	protein_coding	51.03	69.29	1.35783
MFHAS1	ENSG00000147324.10	protein_coding	5.45	7.4	1.3578
NFE2L3	ENSG00000050344.8	protein_coding	35.5	48.2	1.35775
ZNF701	ENSG00000167562.11	protein_coding	3.97	5.39	1.35768
ZYG11A	ENSG00000203995.9	protein_coding	2.21	3	1.35747
METTL9	ENSG00000197006.13	protein_coding	72.82	98.85	1.35746
GFM2	ENSG00000164347.17	protein_coding	14.89	20.21	1.35729
MPHOSPH10	ENSG00000124383.8	protein_coding	21.44	29.1	1.35728
NUDT8	ENSG00000167799.9	protein_coding	3.22	4.37	1.35714
TP53	ENSG00000141510.16	protein_coding	26.62	36.12	1.35687
RPA3	ENSG00000106399.11	protein_coding	34.76	47.16	1.35673
INTS8	ENSG00000164941.13	protein_coding	13.55	18.38	1.35646
CDCA7L	ENSG00000164649.19	protein_coding	42.76	58	1.35641
CORO1C	ENSG00000110880.10	protein_coding	271.05	367.64	1.35635
WWOX	ENSG00000186153.16	protein_coding	5.39	7.31	1.35622
ARHGAP33	ENSG00000004777.18	protein_coding	4.1	5.56	1.3561
NCBP1	ENSG00000136937.12	protein_coding	18.09	24.53	1.356
CDCA3	ENSG00000111665.11	protein_coding	59.47	80.64	1.35598
SLF1	ENSG00000133302.12	protein_coding	3.26	4.42	1.35583
PSMA4	ENSG00000041357.15	protein_coding	207.81	281.75	1.35581
DESI1	ENSG00000100418.7	protein_coding	17.43	23.63	1.35571
MRM1	ENSG00000278619.4	protein_coding	2.98	4.04	1.3557
MSANTD2	ENSG00000120458.10	protein_coding	4.5	6.1	1.35556
EXOSC6	ENSG00000223496.2	protein_coding	3.6	4.88	1.35556
PMF1-BGLAP	ENSG00000260238.6	protein_coding	4.36	5.91	1.3555
TOMM20	ENSG00000173726.10	protein_coding	135.62	183.83	1.35548
ZNF772	ENSG00000197128.11	protein_coding	3.35	4.54	1.35522
THRB	ENSG00000151090.17	protein_coding	14.95	20.26	1.35518
SMAD5	ENSG00000113658.16	protein_coding	15.55	21.07	1.35498
KCTD6	ENSG00000168301.12	protein_coding	5.78	7.83	1.35467
HHEX	ENSG00000152804.10	protein_coding	5.47	7.41	1.35466
SH3BP1	ENSG00000100092.20	protein_coding	3.81	5.16	1.35433
PARP2	ENSG00000129484.13	protein_coding	17.81	24.12	1.3543
MRPL32	ENSG00000106591.3	protein_coding	28.39	38.44	1.354
QSER1	ENSG00000060749.14	protein_coding	15.85	21.46	1.35394
USP14	ENSG00000101557.14	protein_coding	19.61	26.55	1.3539
DNAJB14	ENSG00000164031.16	protein_coding	34.08	46.14	1.35387
KIAA1328	ENSG00000150477.14	protein_coding	1.3	1.76	1.35385
DLAT	ENSG00000150768.15	protein_coding	10.29	13.93	1.35374
CCNJ	ENSG00000107443.15	protein_coding	5.88	7.96	1.35374
DNAJC2	ENSG00000105821.14	protein_coding	27	36.55	1.3537
XRCC1	ENSG00000073050.11	protein_coding	14.17	19.18	1.35356
C1QBP	ENSG00000108561.8	protein_coding	163.58	221.4	1.35347
WSB2	ENSG00000176871.8	protein_coding	90.56	122.56	1.35336
LPIN2	ENSG00000101577.9	protein_coding	14.15	19.15	1.35336
SSBP1	ENSG00000106028.10	protein_coding	191.87	259.66	1.35331
TRMT61A	ENSG00000166166.12	protein_coding	6.88	9.31	1.3532
RANBP1	ENSG00000099901.16	protein_coding	181.39	245.42	1.353
TFRC	ENSG00000072274.12	protein_coding	167.61	226.71	1.3526
FAM72C	ENSG00000263513.5	protein_coding	5.05	6.83	1.35248
SRSF10	ENSG00000188529.14	protein_coding	88.47	119.65	1.35244
ELP3	ENSG00000134014.16	protein_coding	18.96	25.64	1.35232
BRCC3	ENSG00000185515.14	protein_coding	22.51	30.44	1.35229
HECA	ENSG00000112406.4	protein_coding	7.95	10.75	1.3522
XPO1	ENSG00000082898.16	protein_coding	121.6	164.4	1.35197
GNA13	ENSG00000120063.9	protein_coding	37.28	50.39	1.35166
KIF14	ENSG00000118193.11	protein_coding	14.48	19.57	1.35152
PLPP5	ENSG00000147535.16	protein_coding	20.8	28.11	1.35144
GART	ENSG00000159131.16	protein_coding	40.68	54.97	1.35128
ST3GAL1	ENSG00000008513.14	protein_coding	6.89	9.31	1.35123
WARS2	ENSG00000116874.11	protein_coding	6.21	8.39	1.35105
TRIQK	ENSG00000205133.11	protein_coding	15.19	20.52	1.35089
CCDC85C	ENSG00000205476.8	protein_coding	11.23	15.17	1.35085
GUCD1	ENSG00000138867.16	protein_coding	50.21	67.82	1.35073
POC1B	ENSG00000139323.13	protein_coding	12.44	16.8	1.35048
CNOT6	ENSG00000113300.11	protein_coding	7.25	9.79	1.35034
HSPA4	ENSG00000170606.13	protein_coding	54.62	73.75	1.35024
POT1	ENSG00000128513.14	protein_coding	27.87	37.63	1.3502
HOMER1	ENSG00000152413.14	protein_coding	6.54	8.83	1.35015
UTP20	ENSG00000120800.4	protein_coding	15.28	20.63	1.35013
MPP5	ENSG00000072415.8	protein_coding	18.54	25.03	1.35005
DESI2	ENSG00000121644.18	protein_coding	36.71	49.56	1.35004
SPAG5	ENSG00000076382.16	protein_coding	25.3	34.15	1.3498
HNRNPU	ENSG00000153187.17	protein_coding	282.31	381.03	1.34969
FAM200A	ENSG00000221909.2	protein_coding	4.69	6.33	1.34968
ATP6V0E2	ENSG00000171130.17	protein_coding	27.75	37.45	1.34955
PHTF1	ENSG00000116793.15	protein_coding	13	17.54	1.34923
SMIM11B	ENSG00000273590.4	protein_coding	13.35	18.01	1.34906
DRG1	ENSG00000185721.11	protein_coding	33.84	45.64	1.3487
STX1A	ENSG00000106089.11	protein_coding	11.33	15.28	1.34863
SREK1	ENSG00000153914.15	protein_coding	30.75	41.47	1.34862
SNRPB2	ENSG00000125870.10	protein_coding	59.55	80.31	1.34861
FNBP1L	ENSG00000137942.16	protein_coding	11.13	15.01	1.34861
ID2	ENSG00000115738.9	protein_coding	6.6	8.9	1.34848
KDELC2	ENSG00000178202.12	protein_coding	16.53	22.29	1.34846
SDCBP	ENSG00000137575.11	protein_coding	129.57	174.71	1.34838
TIMM23B	ENSG00000204152.10	protein_coding	4.97	6.7	1.34809
NR1D2	ENSG00000174738.12	protein_coding	20.4	27.5	1.34804
MCUR1	ENSG00000050393.11	protein_coding	12.59	16.97	1.3479
HIST1H4J	ENSG00000197238.4	protein_coding	15.01	20.23	1.34777
PWWP2A	ENSG00000170234.12	protein_coding	4.72	6.36	1.34746
TOP2A	ENSG00000131747.14	protein_coding	171.8	231.42	1.34703
TGM2	ENSG00000198959.11	protein_coding	115.86	156.06	1.34697
FOXL1	ENSG00000176678.5	protein_coding	4.67	6.29	1.3469
YY1	ENSG00000100811.11	protein_coding	34.99	47.12	1.34667
MTMR1	ENSG00000063601.16	protein_coding	29.24	39.37	1.34644
TSN	ENSG00000211460.11	protein_coding	85.13	114.62	1.34641
CDS1	ENSG00000163624.5	protein_coding	4.88	6.57	1.34631
CCDC90B	ENSG00000137500.9	protein_coding	37.05	49.88	1.34629
ZBTB21	ENSG00000173276.13	protein_coding	5.69	7.66	1.34622
TMEM106B	ENSG00000106460.18	protein_coding	26.21	35.28	1.34605
NEDD4L	ENSG00000049759.17	protein_coding	45.65	61.44	1.34589
CENPE	ENSG00000138778.11	protein_coding	14.2	19.11	1.34577
RINT1	ENSG00000135249.7	protein_coding	19.03	25.61	1.34577
XPA	ENSG00000136936.10	protein_coding	6.25	8.41	1.3456
DYNC1I1	ENSG00000158560.14	protein_coding	1.65	2.22	1.34545
DIXDC1	ENSG00000150764.13	protein_coding	5.42	7.29	1.34502
CEP44	ENSG00000164118.12	protein_coding	5.71	7.68	1.34501
UPF3B	ENSG00000125351.11	protein_coding	20.36	27.38	1.34479
FAM156A	ENSG00000268350.7	protein_coding	10.4	13.98	1.34423
C14orf142	ENSG00000170270.4	protein_coding	9.27	12.46	1.34412
PIGM	ENSG00000143315.6	protein_coding	2.21	2.97	1.34389
KIAA0391	ENSG00000100890.15	protein_coding	19.37	26.03	1.34383
QRICH1	ENSG00000198218.10	protein_coding	30.95	41.59	1.34378
GTF2H1	ENSG00000110768.11	protein_coding	34.91	46.91	1.34374
PPP2R2A	ENSG00000221914.8	protein_coding	38.61	51.88	1.34369
NCAPG2	ENSG00000146918.19	protein_coding	48.58	65.26	1.34335
RPA2	ENSG00000117748.9	protein_coding	33.91	45.55	1.34326
PRMT5	ENSG00000100462.15	protein_coding	38.42	51.59	1.34279
CDC5L	ENSG00000096401.7	protein_coding	15.58	20.92	1.34275
PPIP5K2	ENSG00000145725.19	protein_coding	18.79	25.23	1.34274
MFSD8	ENSG00000164073.9	protein_coding	5.02	6.74	1.34263
CDYL	ENSG00000153046.17	protein_coding	29.73	39.91	1.34242
LRP4	ENSG00000134569.9	protein_coding	8.47	11.37	1.34238
CTNNAL1	ENSG00000119326.14	protein_coding	103.46	138.88	1.34235
RELB	ENSG00000104856.13	protein_coding	8.5	11.41	1.34235
XDH	ENSG00000158125.9	protein_coding	1.11	1.49	1.34234
RFX5	ENSG00000143390.17	protein_coding	14	18.79	1.34214
MTCH2	ENSG00000109919.9	protein_coding	52.53	70.5	1.34209
DNAJA2	ENSG00000069345.11	protein_coding	30.5	40.93	1.34197
UHRF1	ENSG00000276043.4	protein_coding	29.98	40.23	1.34189
C3orf67	ENSG00000163689.19	protein_coding	5.89	7.9	1.34126
ZBTB39	ENSG00000166860.2	protein_coding	2.99	4.01	1.34114
TRIM2	ENSG00000109654.14	protein_coding	2.64	3.54	1.34091
PRDM15	ENSG00000141956.13	protein_coding	1.76	2.36	1.34091
LSM14B	ENSG00000149657.19	protein_coding	50.75	68.05	1.34089
COMMD10	ENSG00000145781.8	protein_coding	12.38	16.6	1.34087
CENPA	ENSG00000115163.14	protein_coding	37.56	50.36	1.34079
RUFY1	ENSG00000176783.14	protein_coding	19.75	26.48	1.34076
PNP	ENSG00000198805.11	protein_coding	29.06	38.96	1.34067
PI4K2B	ENSG00000038210.12	protein_coding	17.09	22.91	1.34055
PGP	ENSG00000184207.8	protein_coding	8.93	11.97	1.34043
RNFT1	ENSG00000189050.15	protein_coding	5.2	6.97	1.34038
ATP6V1C1	ENSG00000155097.11	protein_coding	42.93	57.54	1.34032
SIGMAR1	ENSG00000147955.16	protein_coding	51.13	68.53	1.34031
VANGL1	ENSG00000173218.14	protein_coding	10.61	14.22	1.34025
BAG4	ENSG00000156735.10	protein_coding	6.85	9.18	1.34015
EGFL7	ENSG00000172889.15	protein_coding	9.91	13.28	1.34006
NUP133	ENSG00000069248.11	protein_coding	21.9	29.34	1.33973
RHEBL1	ENSG00000167550.10	protein_coding	2.18	2.92	1.33945
AQP11	ENSG00000178301.3	protein_coding	1.09	1.46	1.33945
H3F3A	ENSG00000163041.9	protein_coding	273.84	366.79	1.33943
PRPS1	ENSG00000147224.10	protein_coding	53.79	72.04	1.33928
ABCB10	ENSG00000135776.4	protein_coding	13.77	18.44	1.33914
RTEL1-TNFRSF6B	ENSG00000026036.21	protein_coding	6.34	8.49	1.33912
FAM91A1	ENSG00000176853.15	protein_coding	18.78	25.14	1.33866
PPID	ENSG00000171497.4	protein_coding	22.62	30.28	1.33864
KATNBL1	ENSG00000134152.10	protein_coding	16.36	21.9	1.33863
TELO2	ENSG00000100726.14	protein_coding	30.43	40.73	1.33848
POLR1C	ENSG00000171453.17	protein_coding	28.55	38.21	1.33835
PSAT1	ENSG00000135069.13	protein_coding	118.6	158.72	1.33828
TRAPPC8	ENSG00000153339.13	protein_coding	10.82	14.48	1.33826
TOPORS-AS1	ENSG00000235453.8	protein_coding	4.23	5.66	1.33806
NFKBIB	ENSG00000104825.16	protein_coding	12.9	17.26	1.33798
CENPW	ENSG00000203760.8	protein_coding	30.71	41.08	1.33768
IPO5	ENSG00000065150.18	protein_coding	112.2	150.07	1.33752
OTUD7B	ENSG00000264522.5	protein_coding	4.8	6.42	1.3375
TNPO1	ENSG00000083312.17	protein_coding	51.69	69.13	1.3374
DOHH	ENSG00000129932.7	protein_coding	11.45	15.31	1.33712
R3HCC1	ENSG00000104679.10	protein_coding	5.43	7.26	1.33702
EFNA4	ENSG00000243364.7	protein_coding	6.8	9.09	1.33676
SUMO2	ENSG00000188612.11	protein_coding	172.61	230.68	1.33642
ZNF527	ENSG00000189164.14	protein_coding	2.17	2.9	1.33641
NRF1	ENSG00000106459.14	protein_coding	7.8	10.42	1.3359
TOX	ENSG00000198846.5	protein_coding	6.64	8.87	1.33584
NUDT12	ENSG00000112874.9	protein_coding	5.39	7.2	1.33581
ZBTB33	ENSG00000177485.6	protein_coding	11.02	14.72	1.33575
CXCL16	ENSG00000161921.14	protein_coding	1.49	1.99	1.33557
ABCD3	ENSG00000117528.11	protein_coding	21.58	28.82	1.3355
PTTG1	ENSG00000164611.12	protein_coding	118.58	158.36	1.33547
PCNT	ENSG00000160299.16	protein_coding	10.14	13.54	1.33531
CDK1	ENSG00000170312.15	protein_coding	81.63	109	1.33529
RSL1D1	ENSG00000171490.12	protein_coding	177.5	236.96	1.33499
NUDT6	ENSG00000170917.13	protein_coding	4.06	5.42	1.33498
AP1AR	ENSG00000138660.11	protein_coding	9.09	12.13	1.33443
HGH1	ENSG00000235173.6	protein_coding	15.28	20.39	1.33442
FOPNL	ENSG00000133393.12	protein_coding	47.28	63.09	1.33439
MRPL13	ENSG00000172172.7	protein_coding	49.26	65.73	1.33435
PAFAH1B3	ENSG00000079462.7	protein_coding	51.66	68.93	1.3343
IL4I1	ENSG00000104951.15	protein_coding	7.27	9.7	1.33425
KPNA3	ENSG00000102753.9	protein_coding	24.63	32.86	1.33415
MRM2	ENSG00000122687.17	protein_coding	17.72	23.64	1.33409
ACTL6A	ENSG00000136518.16	protein_coding	73.43	97.96	1.33406
C14orf169	ENSG00000170468.7	protein_coding	4.94	6.59	1.33401
HSDL2	ENSG00000119471.14	protein_coding	21.22	28.3	1.33365
MTMR9	ENSG00000104643.9	protein_coding	1.65	2.2	1.33333
HINT3	ENSG00000111911.6	protein_coding	10.65	14.2	1.33333
ANAPC7	ENSG00000196510.12	protein_coding	42.33	56.43	1.3331
SNRNP48	ENSG00000168566.12	protein_coding	13.48	17.97	1.33309
TADA1	ENSG00000152382.5	protein_coding	7.15	9.53	1.33287
DKC1	ENSG00000130826.16	protein_coding	77.22	102.91	1.33269
CDC20	ENSG00000117399.13	protein_coding	142.83	190.32	1.33249
ADNP2	ENSG00000101544.8	protein_coding	7.22	9.62	1.33241
HOXC4	ENSG00000198353.7	protein_coding	3.4	4.53	1.33235
CERS6	ENSG00000172292.14	protein_coding	9.42	12.55	1.33227
HAUS3	ENSG00000214367.7	protein_coding	8.79	11.71	1.3322
ZNF417	ENSG00000173480.10	protein_coding	5.15	6.86	1.33204
NCAPD2	ENSG00000010292.12	protein_coding	75.98	101.19	1.3318
STRAP	ENSG00000023734.10	protein_coding	163.84	218.2	1.33179
SF3A2	ENSG00000104897.9	protein_coding	50.56	67.32	1.33149
HNRNPA3	ENSG00000170144.19	protein_coding	323.42	430.62	1.33146
TARS	ENSG00000113407.13	protein_coding	191.43	254.88	1.33145
GCSH	ENSG00000140905.9	protein_coding	29.36	39.09	1.3314
YARS2	ENSG00000139131.12	protein_coding	19.92	26.52	1.33133
ZNF146	ENSG00000167635.11	protein_coding	66.8	88.88	1.33054
WDR77	ENSG00000116455.13	protein_coding	18.91	25.16	1.33051
CDKAL1	ENSG00000145996.11	protein_coding	6.66	8.86	1.33033
TUBGCP3	ENSG00000126216.13	protein_coding	13.05	17.36	1.33027
XPO5	ENSG00000124571.17	protein_coding	26.89	35.77	1.33023
SLC35F2	ENSG00000110660.14	protein_coding	21.17	28.16	1.33018
CCNF	ENSG00000162063.12	protein_coding	15.27	20.31	1.33006
DDX10	ENSG00000178105.9	protein_coding	15.21	20.23	1.33005
BCL10	ENSG00000142867.12	protein_coding	17.18	22.85	1.33003
CDKN2AIPNL	ENSG00000237190.3	protein_coding	23.82	31.68	1.32997
SLC25A25	ENSG00000148339.12	protein_coding	1.97	2.62	1.32995
XRCC4	ENSG00000152422.15	protein_coding	10.04	13.35	1.32968
QSOX2	ENSG00000165661.16	protein_coding	15.75	20.94	1.32952
NOL6	ENSG00000165271.16	protein_coding	15.09	20.06	1.32936
IFITM2	ENSG00000185201.16	protein_coding	3.31	4.4	1.32931
FLT3LG	ENSG00000090554.12	protein_coding	4.86	6.46	1.32922
SLC25A40	ENSG00000075303.12	protein_coding	16.53	21.97	1.3291
USP12	ENSG00000152484.13	protein_coding	16.08	21.37	1.32898
EXOSC9	ENSG00000123737.12	protein_coding	18.18	24.16	1.32893
C3orf52	ENSG00000114529.12	protein_coding	9.06	12.04	1.32892
PRKX	ENSG00000183943.5	protein_coding	9.34	12.41	1.32869
ZNF438	ENSG00000183621.15	protein_coding	2.07	2.75	1.3285
TAF9B	ENSG00000187325.4	protein_coding	27.28	36.24	1.32845
ALYREF	ENSG00000183684.7	protein_coding	117.19	155.68	1.32844
CISD2	ENSG00000145354.9	protein_coding	33.63	44.67	1.32828
RCN1	ENSG00000049449.8	protein_coding	237.89	315.98	1.32826
PCGF5	ENSG00000180628.14	protein_coding	40.99	54.44	1.32813
KIF18A	ENSG00000121621.6	protein_coding	12.04	15.99	1.32807
MATR3	ENSG00000015479.17	protein_coding	185.54	246.41	1.32807
MBNL1	ENSG00000152601.17	protein_coding	40.24	53.43	1.32778
HSPE1	ENSG00000115541.10	protein_coding	270.22	358.77	1.3277
GMFB	ENSG00000197045.12	protein_coding	37.05	49.19	1.32767
OLA1	ENSG00000138430.15	protein_coding	163.4	216.92	1.32754
SLC43A3	ENSG00000134802.17	protein_coding	63.8	84.67	1.32712
MSRB3	ENSG00000174099.10	protein_coding	15.75	20.9	1.32698
SNPH	ENSG00000101298.13	protein_coding	2.6	3.45	1.32692
LPIN1	ENSG00000134324.11	protein_coding	8.14	10.8	1.32678
RAPGEF6	ENSG00000158987.20	protein_coding	4.07	5.4	1.32678
ZDHHC20	ENSG00000180776.15	protein_coding	30.85	40.93	1.32674
BCOR	ENSG00000183337.16	protein_coding	12.86	17.06	1.32659
POGK	ENSG00000143157.11	protein_coding	14.27	18.93	1.32656
ERCC6	ENSG00000225830.11	protein_coding	3.31	4.39	1.32628
ZNF695	ENSG00000197472.14	protein_coding	6.93	9.19	1.32612
MFSD14C	ENSG00000196312.12	protein_coding	18.37	24.36	1.32608
LUZP6	ENSG00000267697.1	protein_coding	119.74	158.78	1.32604
RP2	ENSG00000102218.5	protein_coding	16.87	22.37	1.32602
NUF2	ENSG00000143228.12	protein_coding	32.88	43.59	1.32573
DOPEY2	ENSG00000142197.12	protein_coding	12.75	16.9	1.32549
PRELID1	ENSG00000169230.9	protein_coding	123.86	164.17	1.32545
NOP2	ENSG00000111641.11	protein_coding	28.32	37.53	1.32521
RAB28	ENSG00000157869.14	protein_coding	16.7	22.13	1.32515
FANCF	ENSG00000183161.4	protein_coding	3.23	4.28	1.32508
TTL	ENSG00000114999.7	protein_coding	33.77	44.74	1.32484
GPATCH2L	ENSG00000089916.17	protein_coding	10.93	14.48	1.32479
ZNF142	ENSG00000115568.15	protein_coding	8.1	10.73	1.32469
SOCS6	ENSG00000170677.5	protein_coding	15.28	20.24	1.32461
MAML1	ENSG00000161021.11	protein_coding	7.12	9.43	1.32444
RNASEH2A	ENSG00000104889.4	protein_coding	73.69	97.59	1.32433
LARS	ENSG00000133706.17	protein_coding	44.58	59.03	1.32414
TADA2A	ENSG00000276234.4	protein_coding	7.93	10.5	1.32409
TMEM183A	ENSG00000163444.11	protein_coding	37.32	49.41	1.32395
GPR180	ENSG00000152749.7	protein_coding	7.69	10.18	1.3238
ARHGAP18	ENSG00000146376.10	protein_coding	30.47	40.33	1.3236
DAB2IP	ENSG00000136848.16	protein_coding	1.02	1.35	1.32353
MATN3	ENSG00000132031.12	protein_coding	2.35	3.11	1.3234
CCNO	ENSG00000152669.8	protein_coding	2.01	2.66	1.32338
RP11-529K1.3	ENSG00000260537.2	protein_coding	3.62	4.79	1.3232
ZNF354A	ENSG00000169131.10	protein_coding	3.28	4.34	1.32317
NOCT	ENSG00000151014.5	protein_coding	9.41	12.45	1.32306
HOXA5	ENSG00000106004.4	protein_coding	2.91	3.85	1.32302
EIF1AX	ENSG00000173674.10	protein_coding	84.38	111.63	1.32294
RACGAP1	ENSG00000161800.12	protein_coding	64.32	85.09	1.32292
ZNF350	ENSG00000256683.6	protein_coding	5.55	7.34	1.32252
PPRC1	ENSG00000148840.10	protein_coding	15.41	20.38	1.32252
GYG1	ENSG00000163754.17	protein_coding	30.06	39.75	1.32236
BIK	ENSG00000100290.2	protein_coding	7.54	9.97	1.32228
RBBP4	ENSG00000162521.18	protein_coding	136.32	180.24	1.32218
AVPI1	ENSG00000119986.6	protein_coding	10.06	13.3	1.32207
FOXN2	ENSG00000170802.15	protein_coding	4.13	5.46	1.32203
SUZ12	ENSG00000178691.10	protein_coding	17.86	23.61	1.32195
AKIRIN1	ENSG00000174574.15	protein_coding	44.78	59.18	1.32157
VARS	ENSG00000204394.12	protein_coding	61.83	81.71	1.32153
EFHC1	ENSG00000096093.15	protein_coding	29.77	39.34	1.32146
PLAU	ENSG00000122861.15	protein_coding	320.31	423.19	1.32119
KCTD20	ENSG00000112078.13	protein_coding	29.93	39.54	1.32108
ARPC5L	ENSG00000136950.13	protein_coding	36.35	48.02	1.32105
DARS2	ENSG00000117593.9	protein_coding	11.44	15.11	1.3208
NASP	ENSG00000132780.16	protein_coding	136.45	180.22	1.32078
PEX13	ENSG00000162928.8	protein_coding	7.67	10.13	1.32073
UBP1	ENSG00000153560.11	protein_coding	26.07	34.43	1.32068
COX10	ENSG00000006695.10	protein_coding	8.64	11.41	1.3206
AUNIP	ENSG00000127423.10	protein_coding	4.68	6.18	1.32051
GNL3	ENSG00000163938.16	protein_coding	65.99	87.14	1.3205
GTF2H2C	ENSG00000183474.15	protein_coding	16.57	21.88	1.32046
SF3A3	ENSG00000183431.11	protein_coding	62.75	82.84	1.32016
XPO7	ENSG00000130227.16	protein_coding	19.25	25.41	1.32
TIMELESS	ENSG00000111602.11	protein_coding	37.44	49.42	1.31998
TOMM70	ENSG00000154174.7	protein_coding	32.16	42.45	1.31996
CASD1	ENSG00000127995.16	protein_coding	9.41	12.42	1.31987
KIAA0586	ENSG00000100578.14	protein_coding	5.91	7.8	1.3198
ZFP91	ENSG00000186660.14	protein_coding	21.65	28.57	1.31963
AGPAT5	ENSG00000155189.11	protein_coding	9.14	12.06	1.31947
ZSCAN12	ENSG00000158691.14	protein_coding	4.07	5.37	1.31941
MSANTD4	ENSG00000170903.10	protein_coding	9.55	12.6	1.31937
TGS1	ENSG00000137574.10	protein_coding	8.11	10.7	1.31936
UVRAG	ENSG00000198382.8	protein_coding	4.01	5.29	1.3192
SRSF4	ENSG00000116350.16	protein_coding	87.38	115.27	1.31918
C18orf21	ENSG00000141428.16	protein_coding	13.41	17.69	1.31916
GAB1	ENSG00000109458.8	protein_coding	2.07	2.73	1.31884
BANP	ENSG00000172530.20	protein_coding	8.63	11.38	1.31866
RBM12B	ENSG00000183808.11	protein_coding	13.54	17.85	1.31832
MTRR	ENSG00000124275.14	protein_coding	36.38	47.96	1.31831
SQSTM1	ENSG00000161011.19	protein_coding	282.05	371.81	1.31824
XRCC5	ENSG00000079246.15	protein_coding	192.28	253.47	1.31823
TRMT61B	ENSG00000171103.10	protein_coding	11.69	15.41	1.31822
LIG3	ENSG00000005156.11	protein_coding	19.77	26.06	1.31816
SAE1	ENSG00000142230.11	protein_coding	163.98	216.12	1.31797
IQCB1	ENSG00000173226.16	protein_coding	27.27	35.93	1.31757
PRPF4B	ENSG00000112739.16	protein_coding	34.37	45.28	1.31743
PAPD5	ENSG00000121274.12	protein_coding	6.49	8.55	1.31741
PLEKHN1	ENSG00000187583.10	protein_coding	4.35	5.73	1.31724
SRPK1	ENSG00000096063.15	protein_coding	42.81	56.39	1.31722
UTP14A	ENSG00000156697.12	protein_coding	18.7	24.63	1.31711
AGO4	ENSG00000134698.10	protein_coding	4.51	5.94	1.31707
MDM2	ENSG00000135679.22	protein_coding	94.84	124.91	1.31706
RP3-461F17.3	ENSG00000268439.5	protein_coding	30.31	39.91	1.31673
RMI1	ENSG00000178966.16	protein_coding	7.8	10.27	1.31667
HNRNPDL	ENSG00000152795.17	protein_coding	228.63	301.02	1.31663
HOXC6	ENSG00000197757.7	protein_coding	7.11	9.36	1.31646
ZNF439	ENSG00000171291.8	protein_coding	1.58	2.08	1.31646
E2F4	ENSG00000205250.8	protein_coding	36.51	48.06	1.31635
PSMD11	ENSG00000108671.9	protein_coding	47.39	62.38	1.31631
FBXO48	ENSG00000204923.3	protein_coding	1.17	1.54	1.31624
GSPT1	ENSG00000103342.12	protein_coding	145.82	191.93	1.31621
BZW2	ENSG00000136261.14	protein_coding	40.38	53.14	1.316
GOLPH3L	ENSG00000143457.10	protein_coding	19.77	26.01	1.31563
UBA2	ENSG00000126261.12	protein_coding	92.98	122.32	1.31555
NCEH1	ENSG00000144959.9	protein_coding	70.53	92.78	1.31547
UBIAD1	ENSG00000120942.13	protein_coding	9.48	12.47	1.3154
PSMD5	ENSG00000095261.13	protein_coding	15.92	20.94	1.31533
PTP4A2	ENSG00000184007.18	protein_coding	287.02	377.52	1.31531
NARS	ENSG00000134440.11	protein_coding	85.97	113.07	1.31523
ALG9	ENSG00000086848.14	protein_coding	13.78	18.12	1.31495
AZIN1	ENSG00000155096.13	protein_coding	55.42	72.87	1.31487
PSG3	ENSG00000221826.9	protein_coding	2.7	3.55	1.31481
NT5M	ENSG00000205309.13	protein_coding	2.32	3.05	1.31466
SCYL2	ENSG00000136021.18	protein_coding	21.3	28	1.31455
BORA	ENSG00000136122.15	protein_coding	8.11	10.66	1.31443
DNAJC9	ENSG00000213551.4	protein_coding	29.07	38.21	1.31441
ZC3H15	ENSG00000065548.17	protein_coding	79.1	103.97	1.31441
DBR1	ENSG00000138231.12	protein_coding	9.42	12.38	1.31423
PRDM2	ENSG00000116731.22	protein_coding	7.1	9.33	1.31408
ZNF24	ENSG00000172466.15	protein_coding	12.17	15.99	1.31389
TXNRD1	ENSG00000198431.15	protein_coding	418.73	550.1	1.31373
TP73	ENSG00000078900.14	protein_coding	1.53	2.01	1.31373
BDH1	ENSG00000161267.11	protein_coding	11.29	14.83	1.31355
SS18L1	ENSG00000184402.14	protein_coding	6.38	8.38	1.31348
FAM104B	ENSG00000182518.13	protein_coding	9.38	12.32	1.31343
ADORA2B	ENSG00000170425.3	protein_coding	14.55	19.11	1.3134
MRPL30	ENSG00000185414.19	protein_coding	34.22	44.94	1.31327
CKS1B	ENSG00000173207.12	protein_coding	129.51	170.06	1.3131
CLUH	ENSG00000132361.16	protein_coding	30.67	40.27	1.31301
NRDE2	ENSG00000119720.17	protein_coding	5.72	7.51	1.31294
TOMM34	ENSG00000025772.7	protein_coding	65.65	86.19	1.31287
MEPCE	ENSG00000146834.13	protein_coding	30.18	39.62	1.31279
DONSON	ENSG00000159147.17	protein_coding	25.68	33.71	1.31269
PAPOLA	ENSG00000090060.17	protein_coding	85.78	112.59	1.31254
SCLY	ENSG00000132330.16	protein_coding	8.64	11.34	1.3125
TYW3	ENSG00000162623.15	protein_coding	15.36	20.16	1.3125
BMP2K	ENSG00000138756.17	protein_coding	25.84	33.91	1.31231
UTP18	ENSG00000011260.13	protein_coding	43.94	57.66	1.31224
PLK1	ENSG00000166851.14	protein_coding	72.53	95.17	1.31215
CLASP2	ENSG00000163539.16	protein_coding	10.06	13.2	1.31213
ZNF611	ENSG00000213020.8	protein_coding	6.99	9.17	1.31187
TRIM26	ENSG00000234127.8	protein_coding	17.86	23.43	1.31187
MRPL18	ENSG00000112110.9	protein_coding	54.04	70.89	1.31181
SRCAP	ENSG00000080603.16	protein_coding	14.21	18.64	1.31175
C6orf136	ENSG00000204564.11	protein_coding	9.24	12.12	1.31169
SRP72	ENSG00000174780.15	protein_coding	108.84	142.76	1.31165
PSMD1	ENSG00000173692.12	protein_coding	75.55	99.07	1.31132
ZBED9	ENSG00000232040.2	protein_coding	1.51	1.98	1.31126
OSBPL11	ENSG00000144909.7	protein_coding	11.6	15.21	1.31121
CTR9	ENSG00000198730.7	protein_coding	16.17	21.2	1.31107
HDAC9	ENSG00000048052.21	protein_coding	11.22	14.71	1.31105
ICK	ENSG00000112144.15	protein_coding	3.12	4.09	1.3109
ZNF420	ENSG00000197050.10	protein_coding	3.99	5.23	1.31078
SRGN	ENSG00000122862.4	protein_coding	637.81	835.53	1.31
PGAM5	ENSG00000247077.6	protein_coding	40.23	52.7	1.30997
PCID2	ENSG00000126226.21	protein_coding	37.3	48.86	1.30992
WHRN	ENSG00000095397.13	protein_coding	3.13	4.1	1.3099
TSSK6	ENSG00000178093.13	protein_coding	2.13	2.79	1.30986
PIGF	ENSG00000151665.12	protein_coding	23.44	30.7	1.30973
VPS37C	ENSG00000167987.10	protein_coding	7.2	9.43	1.30972
NAA25	ENSG00000111300.9	protein_coding	18.9	24.75	1.30952
B3GLCT	ENSG00000187676.7	protein_coding	4.01	5.25	1.30923
SLC25A24	ENSG00000085491.15	protein_coding	31.62	41.39	1.30898
2018-09-06	ENSG00000125354.22	protein_coding	4.63	6.06	1.30886
IQCK	ENSG00000174628.16	protein_coding	9.39	12.29	1.30884
CBX3	ENSG00000122565.18	protein_coding	150.39	196.83	1.3088
ASB13	ENSG00000196372.12	protein_coding	4.44	5.81	1.30856
2018-09-15	ENSG00000183291.15	protein_coding	128.49	168.12	1.30843
LYRM2	ENSG00000083099.10	protein_coding	25.81	33.77	1.30841
ETV5	ENSG00000244405.7	protein_coding	29.25	38.26	1.30803
PERP	ENSG00000112378.11	protein_coding	62.73	82.05	1.30799
DPH1	ENSG00000108963.17	protein_coding	14.65	19.16	1.30785
ZNF200	ENSG00000010539.11	protein_coding	6.11	7.99	1.30769
C12orf29	ENSG00000133641.17	protein_coding	19.47	25.46	1.30765
SMOX	ENSG00000088826.17	protein_coding	16.35	21.38	1.30765
ST7	ENSG00000004866.19	protein_coding	12.39	16.2	1.30751
PIP4K2A	ENSG00000150867.13	protein_coding	24.79	32.41	1.30738
FEN1	ENSG00000168496.3	protein_coding	29.03	37.95	1.30727
MSL2	ENSG00000174579.3	protein_coding	12.11	15.83	1.30718
GOLT1B	ENSG00000111711.9	protein_coding	49.82	65.12	1.30711
SDE2	ENSG00000143751.9	protein_coding	7.56	9.88	1.30688
TSHZ1	ENSG00000179981.9	protein_coding	1.76	2.3	1.30682
TOR1AIP2	ENSG00000169905.12	protein_coding	19.59	25.6	1.30679
NEDD1	ENSG00000139350.11	protein_coding	26	33.97	1.30654
NUFIP1	ENSG00000083635.7	protein_coding	4.57	5.97	1.30635
ACSL5	ENSG00000197142.10	protein_coding	17.4	22.73	1.30632
FANCE	ENSG00000112039.3	protein_coding	3.17	4.14	1.30599
ZFAND5	ENSG00000107372.12	protein_coding	100	130.59	1.3059
MMADHC	ENSG00000168288.12	protein_coding	121.86	159.13	1.30584
CSNK1A1	ENSG00000113712.16	protein_coding	148.81	194.31	1.30576
OSBPL6	ENSG00000079156.16	protein_coding	1.8	2.35	1.30556
ARMC2	ENSG00000118690.12	protein_coding	2.16	2.82	1.30556
ADAMTSL1	ENSG00000178031.16	protein_coding	2.72	3.55	1.30515
NAB1	ENSG00000138386.16	protein_coding	22.35	29.17	1.30515
ITGB6	ENSG00000115221.10	protein_coding	3.31	4.32	1.30514
HOXB8	ENSG00000120068.6	protein_coding	5.67	7.4	1.30511
MEGF9	ENSG00000106780.8	protein_coding	9.15	11.94	1.30492
UFM1	ENSG00000120686.11	protein_coding	24.63	32.14	1.30491
MRRF	ENSG00000148187.17	protein_coding	19.65	25.64	1.30483
CARF	ENSG00000138380.17	protein_coding	2.1	2.74	1.30476
H2AFV	ENSG00000105968.18	protein_coding	150.18	195.93	1.30463
ORMDL1	ENSG00000128699.13	protein_coding	44.55	58.12	1.3046
PPP1R10	ENSG00000204569.9	protein_coding	17.5	22.83	1.30457
NBN	ENSG00000104320.13	protein_coding	31.72	41.38	1.30454
FRMD4A	ENSG00000151474.20	protein_coding	4.24	5.53	1.30425
CEP19	ENSG00000174007.7	protein_coding	2.6	3.39	1.30385
LIPT1	ENSG00000144182.16	protein_coding	7.67	10	1.30378
PPA1	ENSG00000180817.11	protein_coding	161.36	210.34	1.30354
KANSL1L	ENSG00000144445.16	protein_coding	4.25	5.54	1.30353
MERTK	ENSG00000153208.16	protein_coding	3.69	4.81	1.30352
NEK9	ENSG00000119638.12	protein_coding	25.34	33.03	1.30347
SAP130	ENSG00000136715.17	protein_coding	16.58	21.61	1.30338
L3HYPDH	ENSG00000126790.11	protein_coding	4.32	5.63	1.30324
TLK2	ENSG00000146872.17	protein_coding	26.88	35.03	1.3032
ZNF84	ENSG00000198040.10	protein_coding	22.56	29.4	1.30319
CHMP2B	ENSG00000083937.8	protein_coding	25.93	33.79	1.30312
MFSD14B	ENSG00000148110.15	protein_coding	36.57	47.65	1.30298
E2F3	ENSG00000112242.14	protein_coding	14.53	18.93	1.30282
TWF1	ENSG00000151239.13	protein_coding	86.88	113.18	1.30272
MOCS3	ENSG00000124217.4	protein_coding	4	5.21	1.3025
TMEM18	ENSG00000151353.14	protein_coding	15.94	20.76	1.30238
TCF12	ENSG00000140262.17	protein_coding	30.58	39.82	1.30216
UQCC1	ENSG00000101019.21	protein_coding	81.45	106.06	1.30215
PACRGL	ENSG00000163138.18	protein_coding	13.24	17.24	1.30211
LCMT2	ENSG00000168806.7	protein_coding	3.94	5.13	1.30203
FOXD1	ENSG00000251493.4	protein_coding	20.37	26.52	1.30191
TSPAN5	ENSG00000168785.7	protein_coding	22.47	29.25	1.30174
TPCN2	ENSG00000162341.16	protein_coding	3.48	4.53	1.30172
CDA	ENSG00000158825.5	protein_coding	2.95	3.84	1.30169
ZNF614	ENSG00000142556.18	protein_coding	5.67	7.38	1.30159
MRPS17	ENSG00000239789.5	protein_coding	9.55	12.43	1.30157
ENSA	ENSG00000143420.17	protein_coding	66.42	86.45	1.30157
FAM92A1	ENSG00000188343.12	protein_coding	9.22	12	1.30152
C14orf93	ENSG00000100802.14	protein_coding	4.91	6.39	1.30143
DUSP28	ENSG00000188542.9	protein_coding	2.82	3.67	1.30142
FAM86C1	ENSG00000158483.15	protein_coding	2.49	3.24	1.3012
NKRF	ENSG00000186416.13	protein_coding	10.89	14.17	1.30119
EGR1	ENSG00000120738.7	protein_coding	1.86	2.42	1.30108
SLC50A1	ENSG00000169241.17	protein_coding	17.74	23.08	1.30101
TESMIN	ENSG00000132749.10	protein_coding	3.09	4.02	1.30097
ASXL2	ENSG00000143970.16	protein_coding	10.6	13.79	1.30094
POP1	ENSG00000104356.10	protein_coding	5.65	7.35	1.30088
TXNDC16	ENSG00000087301.8	protein_coding	3.49	4.54	1.30086
LARS2	ENSG00000011376.9	protein_coding	7.88	10.25	1.30076
CDC26	ENSG00000176386.8	protein_coding	31.23	40.61	1.30035
CDC42SE2	ENSG00000158985.13	protein_coding	8.03	10.44	1.30012
FAM228B	ENSG00000219626.8	protein_coding	8.03	10.44	1.30012
ZNF234	ENSG00000263002.7	protein_coding	2.8	3.64	1.3
DCLRE1B	ENSG00000118655.4	protein_coding	5.2	6.76	1.3
CASC4	ENSG00000166734.18	protein_coding	33.56	43.62	1.29976
LSM12	ENSG00000161654.9	protein_coding	48.78	63.4	1.29971
CNEP1R1	ENSG00000205423.11	protein_coding	7.81	10.15	1.29962
WDR11	ENSG00000120008.15	protein_coding	20.17	26.21	1.29945
HNRNPL	ENSG00000104824.16	protein_coding	290.85	377.93	1.2994
ZNF595	ENSG00000272602.5	protein_coding	4.81	6.25	1.29938
PSMA6	ENSG00000100902.10	protein_coding	174.53	226.78	1.29938
SMNDC1	ENSG00000119953.12	protein_coding	18.85	24.49	1.2992
PSME2	ENSG00000100911.14	protein_coding	86.28	112.09	1.29914
PDPK1	ENSG00000140992.18	protein_coding	17.05	22.15	1.29912
BLZF1	ENSG00000117475.13	protein_coding	16.25	21.11	1.29908
YAF2	ENSG00000015153.14	protein_coding	12.84	16.68	1.29907
PPP2R5A	ENSG00000066027.11	protein_coding	34.08	44.27	1.299
MT1E	ENSG00000169715.14	protein_coding	734.29	953.63	1.29871
TOPORS	ENSG00000197579.7	protein_coding	9.41	12.22	1.29862
CMC1	ENSG00000187118.12	protein_coding	21.5	27.92	1.2986
TMEM87A	ENSG00000103978.15	protein_coding	14.44	18.75	1.29848
TIMM23	ENSG00000265354.3	protein_coding	63.74	82.76	1.2984
TBRG1	ENSG00000154144.12	protein_coding	13.61	17.67	1.29831
PYURF	ENSG00000145337.4	protein_coding	39.26	50.97	1.29827
XYLB	ENSG00000093217.9	protein_coding	1.14	1.48	1.29825
ADK	ENSG00000156110.13	protein_coding	52.48	68.13	1.29821
TRIM44	ENSG00000166326.6	protein_coding	24.62	31.96	1.29813
RP11-438J1.1	ENSG00000272410.5	protein_coding	1.04	1.35	1.29808
LRRC59	ENSG00000108829.9	protein_coding	179.02	232.38	1.29807
KLHL22	ENSG00000099910.16	protein_coding	5.74	7.45	1.29791
LXN	ENSG00000079257.7	protein_coding	14.17	18.39	1.29781
MIPOL1	ENSG00000151338.18	protein_coding	4.5	5.84	1.29778
NOL8	ENSG00000198000.11	protein_coding	15.82	20.53	1.29772
SMIM14	ENSG00000163683.11	protein_coding	25.7	33.35	1.29767
RBMX	ENSG00000147274.14	protein_coding	197.2	255.88	1.29757
SRM	ENSG00000116649.9	protein_coding	99.01	128.47	1.29755
STRADA	ENSG00000266173.5	protein_coding	22.25	28.87	1.29753
C8orf59	ENSG00000176731.11	protein_coding	63.08	81.84	1.2974
HES4	ENSG00000188290.10	protein_coding	24.09	31.25	1.29722
EPB41L4A	ENSG00000129595.12	protein_coding	3.13	4.06	1.29712
HSD17B11	ENSG00000198189.10	protein_coding	24.61	31.92	1.29703
LRPPRC	ENSG00000138095.18	protein_coding	80.9	104.93	1.29703
LSMEM1	ENSG00000181016.9	protein_coding	1.01	1.31	1.29703
LSM10	ENSG00000181817.5	protein_coding	36.43	47.25	1.29701
NUS1	ENSG00000153989.7	protein_coding	35.8	46.43	1.29693
ARMC8	ENSG00000114098.17	protein_coding	22.52	29.2	1.29663
ANLN	ENSG00000011426.10	protein_coding	145.48	188.63	1.2966
CAAP1	ENSG00000120159.11	protein_coding	12.68	16.44	1.29653
TRIM3	ENSG00000110171.18	protein_coding	6.24	8.09	1.29647
USP40	ENSG00000085982.13	protein_coding	72.63	94.16	1.29643
RAB21	ENSG00000080371.5	protein_coding	45.88	59.48	1.29643
AC004381.6	ENSG00000005189.19	protein_coding	3.07	3.98	1.29642
MYCBP	ENSG00000214114.8	protein_coding	27.43	35.56	1.29639
FAM129A	ENSG00000135842.16	protein_coding	37.06	48.04	1.29628
FAM103A1	ENSG00000169612.3	protein_coding	21.4	27.74	1.29626
GGH	ENSG00000137563.11	protein_coding	25.7	33.31	1.29611
GPRIN1	ENSG00000169258.6	protein_coding	13.48	17.47	1.29599
BBIP1	ENSG00000214413.7	protein_coding	26.15	33.88	1.2956
TTC26	ENSG00000105948.13	protein_coding	7.01	9.08	1.29529
PDE4DIP	ENSG00000178104.19	protein_coding	22.32	28.91	1.29525
XXbac-BPG32J3.22	ENSG00000263020.6	protein_coding	2.61	3.38	1.29502
TMEM201	ENSG00000188807.12	protein_coding	6.61	8.56	1.29501
TEX30	ENSG00000151287.16	protein_coding	38.01	49.22	1.29492
SPAST	ENSG00000021574.11	protein_coding	7.7	9.97	1.29481
NFXL1	ENSG00000170448.11	protein_coding	9.16	11.86	1.29476
MAPRE1	ENSG00000101367.8	protein_coding	141.56	183.27	1.29465
MARS2	ENSG00000247626.4	protein_coding	3.36	4.35	1.29464
TTC32	ENSG00000183891.5	protein_coding	5.16	6.68	1.29457
LRRC8D	ENSG00000171492.14	protein_coding	20.03	25.93	1.29456
IVNS1ABP	ENSG00000116679.15	protein_coding	41.08	53.18	1.29455
ZNF740	ENSG00000139651.10	protein_coding	12.53	16.22	1.29449
NUDT3	ENSG00000272325.1	protein_coding	7.71	9.98	1.29442
UTP11	ENSG00000183520.11	protein_coding	46.5	60.19	1.29441
RHEB	ENSG00000106615.9	protein_coding	186.2	240.98	1.2942
ZC3H10	ENSG00000135482.6	protein_coding	1.53	1.98	1.29412
SOS1	ENSG00000115904.12	protein_coding	12.04	15.58	1.29402
CNTRL	ENSG00000119397.16	protein_coding	3.3	4.27	1.29394
TTC9C	ENSG00000162222.13	protein_coding	29.4	38.04	1.29388
POMP	ENSG00000132963.7	protein_coding	96.14	124.38	1.29374
VEGFB	ENSG00000173511.9	protein_coding	41.84	54.13	1.29374
ZNF487	ENSG00000243660.9	protein_coding	2.86	3.7	1.29371
TMEM19	ENSG00000139291.13	protein_coding	18.32	23.7	1.29367
PPP2R1B	ENSG00000137713.15	protein_coding	9.91	12.82	1.29364
POLR2D	ENSG00000144231.10	protein_coding	35.19	45.52	1.29355
NUP88	ENSG00000108559.11	protein_coding	33.08	42.79	1.29353
PUM2	ENSG00000055917.15	protein_coding	27.8	35.96	1.29353
C5orf24	ENSG00000181904.8	protein_coding	15.57	20.14	1.29351
UBA6	ENSG00000033178.12	protein_coding	62.54	80.88	1.29325
METAP1	ENSG00000164024.11	protein_coding	67.08	86.75	1.29323
CRNKL1	ENSG00000101343.14	protein_coding	15.9	20.56	1.29308
MFAP3	ENSG00000037749.11	protein_coding	13.07	16.9	1.29304
RRN3	ENSG00000085721.12	protein_coding	19.67	25.43	1.29283
PRRC2C	ENSG00000117523.15	protein_coding	51.92	67.12	1.29276
NXPE3	ENSG00000144815.15	protein_coding	37.35	48.27	1.29237
TCF7L2	ENSG00000148737.16	protein_coding	7.97	10.3	1.29235
AKT1S1	ENSG00000204673.10	protein_coding	51.07	66	1.29234
ZNF215	ENSG00000149054.15	protein_coding	2.19	2.83	1.29224
RBM34	ENSG00000188739.14	protein_coding	63.32	81.81	1.29201
ADO	ENSG00000181915.4	protein_coding	16.41	21.2	1.2919
EIF2A	ENSG00000144895.11	protein_coding	60.99	78.79	1.29185
GMNN	ENSG00000112312.9	protein_coding	48.73	62.95	1.29181
[truncated: 9,540 more rows]

## Sheet: Sheet3
Supplementary Table 3. List of genes with >2 fold change in 786-O and M62 cells with AXL knockdown
	Gene fold change in M62	Gene fold change in 7860
CRISPLD2	0.36935	0.18143
AXL	0.346064	0.186115
IL7R	2.05664	0.190818
TNFAIP6	0.201145	0.226391
SETD9	2.43262	0.280861
S100A10	0.397542	0.281456
MCAM	0.477077	0.324036
DDIAS	2.00811	0.345223
RHBDL2	0.421384	0.366569
MFSD2A	2.27778	0.367857
MATN2	0.468804	0.375322
EXOSC3	2.16568	0.381921
LETM2	2.35065	0.416
CDC7	2.03929	0.435484
RP11-73M18.2	3.47321	0.444126
CH507-9B2.9	2.2069	0.447837
TFPI2	2.34904	0.474684
GSN	0.480686	0.479947
NAA15	2.0867	0.487793
SUSD1	0.460674	0.49077
ZNF81	0.461774	0.492355
NKAIN4	0.395683	7.36111
FAM132A	0.455026	5.57143
CDH16	0.480892	4.54913
CDH16	0.476136	3.98077
RP11-159D12.5	0.415608	3.74747
ANKRD18B	3.72596	3.59852
TCN2	0.489256	3.46972
ITGB4	0.39375	3.33333
TMEM265	0.465241	3.11199
UCN	0.340678	3.0048
TBC1D3L	0.484756	2.99003
MST1	0.487666	2.82338
RASA4	0.216549	2.7416
FCGRT	0.449848	2.69706
MYO15B	0.435028	2.63953
CLEC2D	2.03067	2.36923
CTD-2021K4.1	2.31889	2.24399
FOLR1	0.317772	2.14328
PIH1D2	2.42553	2.11446
CLHC1	2.61639	2.06517
PPM1N	0.488987	2.03889
ANXA2	0.559174	0.493257

## Sheet: Sheet4
Supplementary Table 4. List of genes with >2 fold downregulation in 786-O and M62 cells with AXL knockdown
	Gene fold change in M62	Gene fold change in 7860
CRISPLD2	0.36935	0.18143
AXL	0.346064	0.186115
TNFAIP6	0.201145	0.226391
S100A10	0.397542	0.281456
MCAM	0.477077	0.324036
RHBDL2	0.421384	0.366569
MATN2	0.468804	0.375322
GSN	0.480686	0.479947
SUSD1	0.460674	0.49077
ZNF81	0.461774	0.492355
